# Supplementary material for: Deaminative carbonylative coupling of alkylamines with styrenes under transition-metal-free conditions
Source: Royal Society of Chemistry journal article supplement (doi:10.1039/d0cc04062b), 2020-01-01

# Supporting Information

## **Deaminative Carbonylative Coupling of Alkylamines with Styrenes under Transition-Metal-Free Conditions**

Fengqian Zhao, Chong-Liang Li, and Xiao-Feng Wu\*

Leibniz-Institut für Katalyse an der Universität Rostock e. V., Albert-Einstein-Straße 29a, 18059 Rostock, Germany  
Phone: (+49)-0381-1281-343; E-Mail: xiao-feng.wu@catalysis.de

# Table of Contents

|                                                                                         |     |
|-----------------------------------------------------------------------------------------|-----|
| 1. General information.....                                                             | S1  |
| 2. Optimization studies.....                                                            | S1  |
| 3. General procedure for the synthesis of various substrates.....                       | S3  |
| 4. General procedure for the synthesis of $\alpha$ , $\beta$ -unsaturated ketones.....  | S10 |
| 5. Reference.....                                                                       | S20 |
| 6. NMR spectra of products: $^1\text{H}$ , $^{13}\text{C}$ and $^{19}\text{F}$ NMR..... | S21 |

## 1. General Information

Unless otherwise noted, materials were purchased from commercial suppliers and used without further purification. Flash column chromatography was performed using 200-300 mesh silica gel.  $^1\text{H}$  NMR spectra were recorded on 300 or 400 MHz spectrophotometers. Chemical shifts are reported in ppm relative to tetramethylsilane (TMS) with the solvent resonance employed as the internal standard ( $\text{CDCl}_3$ :  $\delta = 7.26$  ppm,  $\text{DMSO-}d_6$ :  $\delta = 2.50$  ppm).  $^{13}\text{C}$  NMR was recorded at 75 MHz or 101 MHz; chemical shifts are reported in ppm from tetramethylsilane (TMS) with the solvent resonance as the internal standard ( $\text{CDCl}_3$ :  $\delta = 77.00$  ppm,  $\text{DMSO-}d_6$ :  $\delta = 39.52$  ppm). Electron impact (EI) mass spectra were recorded on AMD 402 mass spectrometer (70 eV). High resolution mass spectra (HR-MS) were recorded on Agilent 6210. The data were given as mass units per charge ( $m/z$ ). Gas chromatography analysis was performed on an Agilent HP-5890 instrument with a FID detector and HP-5 capillary column (polydimethylsiloxane with 5% phenyl groups, 30 m, 0.32 mm i.d., 0.25  $\mu\text{m}$  film thickness) using argon as carrier gas.

## 2. Optimization studies

Table S1 Optimization of the reaction conditions

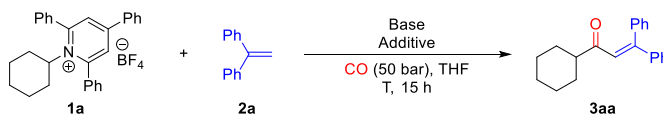

| Entry | 2a (equiv) | Base (equiv) | Additive (equiv)               | T (°C) | 3aa (%) <sup>a</sup> |
|-------|------------|--------------|--------------------------------|--------|----------------------|
| 1     | 2.0        | DBU (2.0)    | /                              | 100    | 54                   |
| 2     | 2.0        | DBN (2.0)    | /                              | 100    | 53                   |
| 3     | 2.0        | TBD (2.0)    | /                              | 100    | 54                   |
| 4     | 2.0        | DABCO (2.0)  | /                              | 100    | 1                    |
| 5     | 2.0        | DIPEA (2.0)  | /                              | 100    | 2                    |
| 6     | 2.0        | DBU (4.0)    | /                              | 100    | 62                   |
| 7     | 2.0        | DBU (2.0)    | $\text{Cs}_2\text{CO}_3$ (1.0) | 100    | 58                   |
| 8     | 2.0        | DBU (2.0)    | $\text{K}_2\text{CO}_3$ (1.0)  | 100    | 58                   |
| 9     | 2.0        | DBU (2.0)    | KOH (1.0)                      | 100    | 55                   |
| 10    | 2.0        | DBU (2.0)    | $\text{K}_2\text{HPO}_4$ (1.0) | 100    | 41                   |
| 11    | 2.0        | DBU (2.0)    | <i>t</i> -BuOK (1.0)           | 100    | 64                   |
| 12    | 2.0        | DBU (2.0)    | <i>t</i> -BuONa (1.0)          | 100    | 50                   |
| 13    | 2.0        | DBU (2.0)    | <i>t</i> -BuOLi (1.0)          | 100    | 66                   |
| 14    | 2.0        | DBU (2.0)    | NaOMe (1.0)                    | 100    | 57                   |

|                 |     |           |                                       |     |                      |
|-----------------|-----|-----------|---------------------------------------|-----|----------------------|
| 15              | 2.0 | DBU (2.0) | LiOMe (1.0)                           | 100 | 68                   |
| 16              | 2.0 | DBU (2.0) | LiOH (1.0)                            | 100 | 59                   |
| 17              | 2.0 | DBU (2.0) | Li <sub>2</sub> CO <sub>3</sub> (1.0) | 100 | 40                   |
| 18              | 2.0 | /         | LiOMe (1.0)                           | 100 | 2                    |
| 19              | 1.0 | DBU (2.0) | LiOMe (1.0)                           | 100 | 48                   |
| 20              | 1.5 | DBU (2.0) | LiOMe (1.0)                           | 100 | 60                   |
| 21              | 3.0 | DBU (2.0) | LiOMe (1.0)                           | 100 | 58                   |
| 22              | 2.0 | DBU (2.0) | LiOMe (1.0)                           | 80  | 70                   |
| 23              | 2.0 | DBU (2.0) | LiOMe (1.0)                           | 70  | 59                   |
| 24 <sup>b</sup> | 2.0 | DBU (2.0) | LiOMe (1.0)                           | 80  | 76 (74) <sup>c</sup> |

Reaction conditions: **1a** (0.1 mmol), **2a** (0.2 mmol), base, additive, THF, CO (50 bar), 15 h. <sup>a</sup> Determined by GC using hexadecane as the internal standard. <sup>b</sup> THF (2.0 mL). <sup>c</sup> isolated yield.

#### Unsuccessful Katritzky salts:

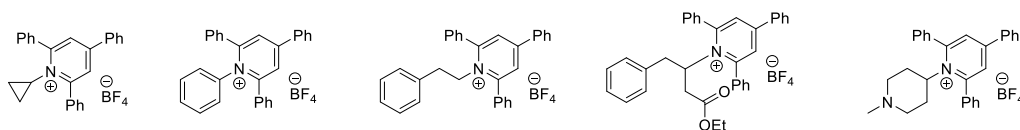

#### Unsuccessful styrenes:

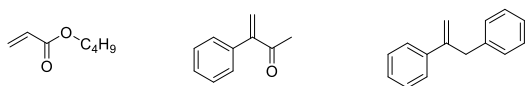

### 3. General procedure for the synthesis of various substrates

#### 3.1 General procedure for synthesis of Katritzky salts

Katritzky salts **1a-1g**, **1k** were all synthesized as described previously.<sup>1</sup>

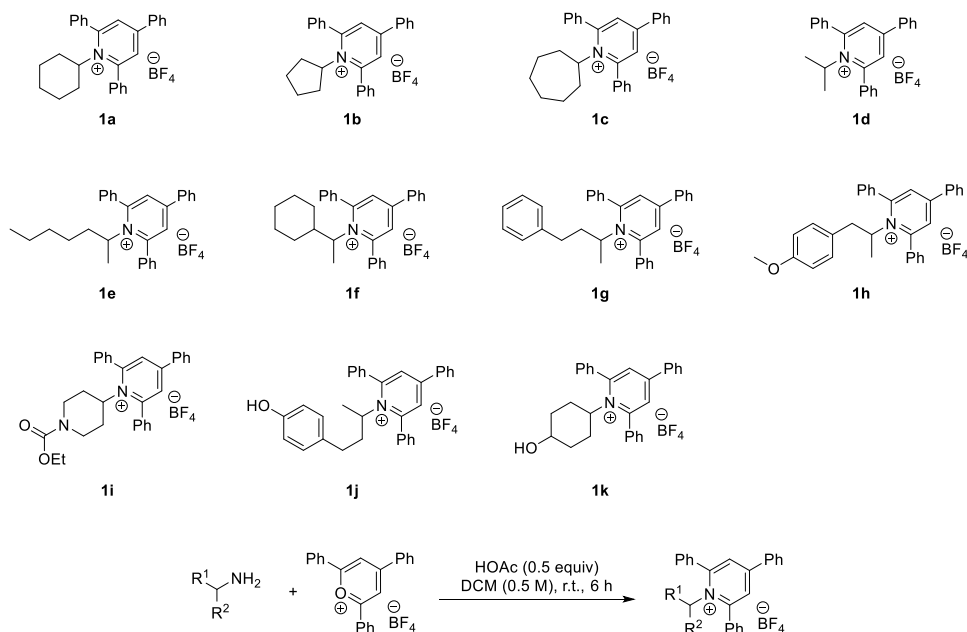

**1h**, **1i** and **1j** were prepared following a procedure by Glonus et al.<sup>1d</sup> A flask was charged with amine (1.2 equiv), DCM (0.5 M) and acetic acid (0.5 equiv), the mixture was stirred at room temperature for 15-30 mins. Subsequently, 2,4,6-Triphenylpyridinium tetrafluoroborate (1.0 equiv) was added and stirred at room temperature for 6 h. If precipitation occurred during the reaction, the solid was collected by filtration and washed with EtOH and Et<sub>2</sub>O. If no precipitation occurred, Et<sub>2</sub>O was added and the crude mixture was stirred for 1 h. The resulting solid was collected by filtration and washed with Et<sub>2</sub>O. If precipitation did still not take place, the solvent was removed under reduced pressure and the crude product was purified by column chromatography (DCM: acetone gradient).

#### 1-(1-(4-Methoxyphenyl)propan-2-yl)-2,4,6-triphenylpyridin-1-ium tetrafluoroborate (**1h**):

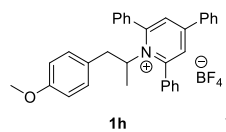

Prepared in accordance to the general procedure to afford **1h** (263 mg, 48% yield) as white solid.

<sup>1</sup>H NMR (300 MHz, DMSO)  $\delta$  8.38 (s, 2H), 8.28 – 8.18 (m, 2H), 7.86 – 7.56 (m, 13H), 6.71 (d,  $J = 8.7$  Hz, 2H), 6.57 (d,  $J = 8.7$  Hz, 2H), 5.05 – 4.89 (m, 1H), 3.66 (s, 3H), 3.15 (dd,  $J = 13.5, 6.0$  Hz, 1H), 2.53 (dd,  $J = 13.8, 8.4$  Hz, 1H), 1.27 (d,  $J = 6.9$  Hz, 3H). <sup>13</sup>C NMR (75 MHz, DMSO)  $\delta$  158.8, 157.9, 153.9, 134.3, 133.3, 133.0, 131.4, 130.1, 123.0, 129.2, 128.6, 114.5, 68.7, 55.5, 41.7, 21.4. HRMS (ESI),  $m/z$ :  $[M-BF_4]^+$  calculated for C<sub>33</sub>H<sub>30</sub>NO: 456.2332, found  $[M-BF_4]^+$ : 456.2324.

### 1-(1-(Ethoxycarbonyl)piperidin-4-yl)-2,4,6-triphenylpyridin-1-ium tetrafluoroborate (**1i**):

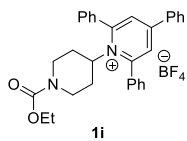

**1i**

Prepared in accordance to the general procedure to afford **1i** (220 mg, 40% yield) as white solid. **<sup>1</sup>H**

**NMR** (300 MHz, CDCl<sub>3</sub>) δ 7.78 – 7.69 (m, 6H), 7.69 – 7.63 (m, 2H), 7.61 – 7.45 (m, 7H), 7.40 (t, *J* = 7.5 Hz, 2H), 4.75 (t, *J* = 12.0 Hz, 1H), 3.94 (q, *J* = 7.2 Hz, 4H), 2.15 – 2.03 (m, 4H), 1.65 – 1.60 (m, 2H), 1.11 (t, *J* = 7.2 Hz, 3H). **<sup>13</sup>C NMR** (75 MHz, CDCl<sub>3</sub>) δ 157.0, 155.3, 155.0, 133.9, 133.7, 131.9, 131.0, 129.5, 129.3, 128.9, 128.2, 128.1, 69.6, 61.4, 44.1, 32.4, 14.5. **HRMS (ESI)**, *m/z*: [M-BF<sub>4</sub>]<sup>+</sup> calculated for C<sub>31</sub>H<sub>31</sub>N<sub>2</sub>O<sub>2</sub>: 463.2390, found[M-BF<sub>4</sub>]<sup>+</sup>: 463.2388.

### 1-(1-(4-Methoxyphenyl)propan-2-yl)-2,4,6-triphenylpyridin-1-ium tetrafluoroborate (**1j**):

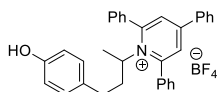

**1j**

Prepared in accordance to the general procedure to afford **1j** (120 mg, 22% yield) as yellow solid.

**<sup>1</sup>H NMR** (300 MHz, DMSO) δ 9.23 (s, 1H), 8.37 (s, 2H), 8.27 – 8.22 (m, 2H), 7.78 – 7.56 (m, 13H), 6.73 (d, *J* = 8.7 Hz, 2H), 6.58 (d, *J* = 8.4 Hz, 2H), 4.84 – 4.69 (m, 1H), 2.23 – 2.13 (m, 1H), 2.02 – 1.91 (m, 2H), 1.66 – 1.52 (m, 1H), 1.39 (d, *J* = 6.9 Hz, 3H). **<sup>13</sup>C NMR** (75 MHz, DMSO) δ 157.2, 155.7, 153.3, 133.9, 132.9, 132.4, 130.8, 129.6, 129.4, 128.9, 128.7, 115.3, 66.0, 37.5, 30.8, 21.9. **HRMS (ESI)**, *m/z*: [M-BF<sub>4</sub>]<sup>+</sup> calculated for C<sub>33</sub>H<sub>30</sub>NO<sub>2</sub>: 456.2332, found[M-BF<sub>4</sub>]<sup>+</sup>: 456.2330.

## 3.2 General procedure for synthesizing styrenes

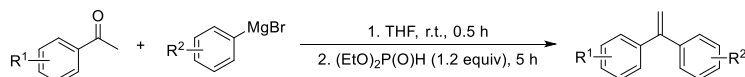

**General procedure A:**<sup>2</sup> The Grignard solution in THF (4.0 mmol) was added dropwise to a solution of acetophenone (2.0 mmol, 1.0 equiv) in dry THF (10 mL) under a nitrogen atmosphere at room temperature. The reaction mixture was stirred for 0.5 h and the diethyl phosphite (2.4 mmol) was added. The mixture was stirred for 5 h. Then, the reaction mixture was added water and extracted with diethyl ether. The combined organic layer was dried over Na<sub>2</sub>SO<sub>4</sub>, filtered and concentrated under reduced pressure. The crude residue was purified by flash chromatography using *n*-Pentane.

### 1-Methyl-2-(1-phenylvinyl)benzene (**2b**):<sup>3</sup>

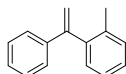

**2b**

Prepared in accordance to the general procedure A to afford **2b** (217 mg, 56% yield) as colorless oil. **<sup>1</sup>H NMR** (300 MHz, CDCl<sub>3</sub>) δ 7.33 – 7.30 (m, 5H), 7.28 – 7.20 (m, 4H), 5.81 (dd, *J* = 1.5, 0.6 Hz, 1H), 5.24 (dd, *J* = 1.5, 0.6 Hz, 1H), 2.09 (d, *J* = 0.6 Hz, 3H). **<sup>13</sup>C NMR** (75 MHz, CDCl<sub>3</sub>) δ 149.4, 141.6, 140.6, 136.1, 130.0, 130.0, 128.3, 127.5, 127.5, 126.5, 125.6, 114.8, 20.1. **GC-MS** (EI, 70 eV): *m/z* (%) = 115 (20), 179 (100), 194 (20).

#### 1-Methyl-3-(1-phenylvinyl)benzene (**2c**):<sup>4</sup>

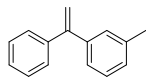

**2c**

Prepared in accordance to the general procedure A to afford **2c** (208 mg, 54% yield) as colorless oil. <sup>1</sup>H NMR (400 MHz, CDCl<sub>3</sub>) δ 7.40 – 7.34 (m, 5H), 7.29 – 7.24 (m, 1H), 7.21 – 7.16 (m, 3H), 5.49 (s, 2H), 2.39 (s, 3H). <sup>13</sup>C NMR (75 MHz, CDCl<sub>3</sub>) δ 150.1, 141.6, 141.5, 137.7, 128.9, 128.4, 128.2, 128.1, 128.0, 127.6, 125.4, 114.1, 21.4. GC-MS (EI, 70 eV): m/z (%) = 179 (100), 194 (80).

#### 1-Methyl-4-(1-phenylvinyl)benzene (**2d**):<sup>5</sup>

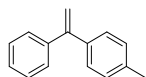

**2d**

Prepared in accordance to the general procedure A to afford **2d** (259 mg, 67% yield) as colorless oil. <sup>1</sup>H NMR (300 MHz, CDCl<sub>3</sub>) δ 7.27 – 7.22 (m, 5H), 7.18 – 7.13 (m, 2H), 7.07 – 7.04 (m, 2H), 5.35 (d, *J* = 1.5 Hz, 1H), 5.32 (d, *J* = 1.5 Hz, 1H), 2.29 (s, 3H). <sup>13</sup>C NMR (75 MHz, CDCl<sub>3</sub>) δ 149.9, 141.7, 138.6, 137.5, 128.8, 128.3, 128.1, 128.1, 127.6, 113.6, 21.2. GC-MS (EI, 70 eV): m/z (%) = 179 (100), 197(80).

#### 1-Methoxy-4-(1-phenylvinyl)benzene (**2e**):<sup>3</sup>

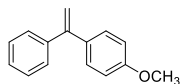

**2e**

Prepared in accordance to the general procedure A to afford **2e** (340.6 mg, 81% yield) as white solid. <sup>1</sup>H NMR (300 MHz, CDCl<sub>3</sub>) δ 7.28 – 7.17 (m, 7H), 6.81 – 6.76 (m, 2H), 5.32 (d, *J* = 1.5 Hz, 1H), 5.28 (d, *J* = 1.5 Hz, 1H), 3.75 (s, 3H). <sup>13</sup>C NMR (75 MHz, CDCl<sub>3</sub>) δ 159.3, 149.5, 141.8, 134.0, 129.4, 128.3, 128.1, 127.6, 113.5, 112.9, 55.3. GC-MS (EI, 70 eV): m/z (%) = 152 (50), 165 (75), 195 (80), 210 (100).

#### 1-(1-Phenylvinyl)-4-(trifluoromethyl)benzene (**2g**):<sup>3</sup>

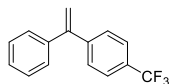

**2g**

Prepared in accordance to the general procedure A to afford **2g** (352.1 mg, 74% yield) as colorless oil. <sup>1</sup>H NMR (300 MHz, CDCl<sub>3</sub>) δ 7.61 – 7.58 (m, 2H), 7.47 – 7.44 (m, 2H), 7.37 – 7.29 (m, 5H), 5.57 (d, *J* = 0.9 Hz, 1H), 5.52 (d, *J* = 0.9 Hz, 1H). <sup>13</sup>C NMR (75 MHz, CDCl<sub>3</sub>) δ 148.9, 145.1, 140.6, 128.6, 128.4, 128.1, 128.1, 125.2 (q, *J* = 3.8 Hz), 124.2 (q, *J* = 272.2 Hz), 115.9. <sup>19</sup>F NMR (282 MHz, CDCl<sub>3</sub>) δ -62.5. GC-MS (EI, 70 eV): m/z (%) = 179 (100), 233 (40), 248 (100).

#### 1-Fluoro-4-(1-phenylvinyl)benzene (**2h**):<sup>6</sup>

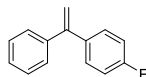

**2h**

Prepared in accordance to the general procedure A to afford **2h** (277.5 mg, 70% yield) as colorless oil. <sup>1</sup>H NMR (300 MHz, CDCl<sub>3</sub>) δ 7.35 – 7.28 (m, 7H), 7.06 – 6.98 (m, 2H), 5.44 (d, *J* = 1.2 Hz, 1H), 5.42 (d, *J* = 1.2 Hz,

1H).  $^{13}\text{C}$  NMR (75 MHz,  $\text{CDCl}_3$ )  $\delta$  162.5 (d,  $J = 244.5$  Hz), 149.0, 141.3, 137.5, 129.9 (d,  $J = 7.5$  Hz), 128.2, 128.2, 127.8, 115.0 (d,  $J = 21.0$  Hz), 114.2 (d,  $J = 1.5$  Hz).  $^{19}\text{F}$  NMR (282 MHz,  $\text{CDCl}_3$ )  $\delta$  -114.8. GC-MS (EI, 70 eV):  $m/z$  (%) = 177 (40), 183 (100), 198 (100).

#### 1-Chloro-4-(1-phenylvinyl)benzene (**2i**):<sup>5</sup>

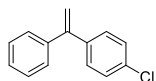

<sup>2i</sup> Prepared in accordance to the general procedure A to afford **2i** (283.4 mg, 66% yield) as colorless oil.

$^1\text{H}$  NMR (300 MHz,  $\text{CDCl}_3$ )  $\delta$  7.38–7.34 (m, 5H), 7.34–7.27 (m, 4H), 5.50 (d,  $J = 1.2$  Hz, 1H), 5.48 (d,  $J = 1.2$  Hz, 1H).  $^{13}\text{C}$  NMR (101 MHz,  $\text{CDCl}_3$ )  $\delta$  149.0, 141.0, 139.9, 133.6, 129.5, 128.3, 128.2, 128.2, 127.9, 114.7. GC-MS (EI, 70 eV):  $m/z$  (%) = 178 (100), 199 (20), 214 (60).

#### 1-Bromo-4-(1-phenylvinyl)benzene (**2j**):<sup>6</sup>

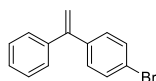

<sup>2j</sup> Prepared in accordance to the general procedure A to afford **2j** (283.6 mg, 55% yield) as colorless oil.

$^1\text{H}$  NMR (300 MHz,  $\text{CDCl}_3$ )  $\delta$  7.48 (dt,  $J = 8.7, 2.4$  Hz, 2H), 7.37–7.30 (m, 5H), 7.23 (dt,  $J = 8.7, 2.4$  Hz, 2H), 5.49 (d,  $J = 1.2$  Hz, 1H), 5.47 (d,  $J = 1.2$  Hz, 1H).  $^{13}\text{C}$  NMR (75 MHz,  $\text{CDCl}_3$ )  $\delta$  149.0, 140.9, 140.4, 131.3, 129.9, 128.3, 128.2, 127.9, 121.8, 114.7. GC-MS (EI, 70 eV):  $m/z$  (%) = 178 (100), 258 (50).

#### 4,4'-(Ethene-1,1-diyl)bis(methylbenzene) (**2l**):<sup>3</sup>

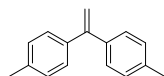

<sup>2l</sup> Prepared in accordance to the general procedure A to afford **2l** (299.5 mg, 72% yield) as white solid.

$^1\text{H}$  NMR (400 MHz,  $\text{CDCl}_3$ )  $\delta$  7.24 (dt,  $J = 8.0, 2.0$  Hz, 4H), 7.14 (m, 4H), 5.39 (s, 2H), 2.37 (s, 6H).  $^{13}\text{C}$  NMR (75 MHz,  $\text{CDCl}_3$ )  $\delta$  149.7, 138.8, 137.4, 128.8, 128.2, 113.0, 21.2. GC-MS (EI, 70 eV):  $m/z$  (%) = 115 (30), 178 (80), 193 (100), 208 (100).

#### 4,4'-(Ethene-1,1-diyl)bis(methoxybenzene) (**2m**):<sup>4</sup>

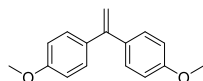

<sup>2m</sup> Prepared in accordance to the general procedure A to afford **2m** (398.0 mg, 62% yield) as white solid.

$^1\text{H}$  NMR (400 MHz,  $\text{CDCl}_3$ )  $\delta$  7.30 (dt,  $J = 10.8, 2.8$  Hz, 4H), 6.89 (dt,  $J = 10.4, 2.8$  Hz, 4H), 5.32 (s, 2H), 3.84 (s, 6H).  $^{13}\text{C}$  NMR (75 MHz,  $\text{CDCl}_3$ )  $\delta$  159.3, 148.9, 134.3, 129.4, 113.4, 111.6, 55.2. GC-MS (EI, 70 eV):  $m/z$  (%) = 153 (40), 165 (50), 182 (30), 209 (40), 225 (80), 240 (100).



### 2-(1-Phenylvinyl)naphthalene (**2p**):<sup>7</sup>

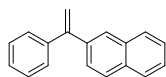

**2p** Prepared in accordance to the general procedure A to afford **2p** (320.0 mg, 35% yield) as colorless oil. **<sup>1</sup>H NMR** (300 MHz, CDCl<sub>3</sub>) δ 7.90 – 7.79 (m, 4H), 7.54 – 7.46 (m, 3H), 7.45 – 7.35 (m, 5H), 5.62 (dd, *J* = 0.9, 0.6 Hz, 1H), 5.58 (dd, *J* = 0.9, 0.6 Hz, 1H). **<sup>13</sup>C NMR** (75 MHz, CDCl<sub>3</sub>) δ 150.0, 141.5, 138.9, 133.3, 133.0, 128.4, 128.2, 128.2, 127.8, 127.7, 127.6, 127.3, 126.4, 126.1, 126.0, 114.8. **GC-MS** (EI, 70 eV): *m/z* (%) = 215 (70), 230 (100).

### 3-(1-Phenylvinyl)thiophene (**2r**):<sup>8</sup>

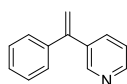

**2r** Prepared in accordance to the general procedure A to afford **2r** (80 mg, 25% yield) as yellow oil. **<sup>1</sup>H NMR** (400 MHz, CDCl<sub>3</sub>) δ 8.61 (d, *J* = 28.8 Hz, 2H), 7.62 (dt, *J* = 8.0, 2.0 Hz, 1H), 7.60 – 7.20 (m, 6H), 5.57 (d, *J* = 0.8 Hz, 1H), 5.50 (d, *J* = 0.8 Hz, 1H). **<sup>13</sup>C NMR** (101 MHz, CDCl<sub>3</sub>) δ 149.0, 148.6, 146.8, 140.2, 137.2, 135.7, 128.4, 128.2, 128.0, 123.1. **GC-MS** (EI, 70 eV): *m/z* (%) = 152 (30), 166 (30), 180 (100), 181 (70).

### 3-(1-Phenylvinyl)thiophene (**2s**):<sup>9</sup>

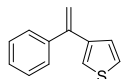

**2s** Prepared in accordance to the general procedure A to afford **2s** (189.0 mg, 50% yield) as yellow oil. **<sup>1</sup>H NMR** (300 MHz, CDCl<sub>3</sub>) δ 7.43 – 7.32 (m, 5H), 7.31 (dd, *J* = 4.8, 3.0 Hz, 1H), 7.19 (dd, *J* = 6.8, 1.5 Hz, 1H), 7.13 (dd, *J* = 3.0, 1.2 Hz, 1H), 5.54 (d, *J* = 1.2 Hz, 1H), 5.34 (d, *J* = 1.2 Hz, 1H). **<sup>13</sup>C NMR** (101 MHz, CDCl<sub>3</sub>) δ 144.6, 142.5, 141.5, 128.2, 128.1, 127.8, 127.2, 125.4, 123.3, 113.4. **GC-MS** (EI, 70 eV): *m/z* (%) = 152 (30), 171 (60), 186 (100).

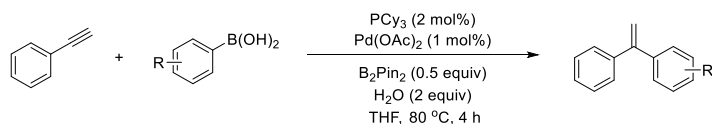

**General procedure B:**<sup>10</sup> A 10 mL round bottomed flask equipped with a magnetic stir bar was charged with alkyne (2.0 mmol), B<sub>2</sub>Pin<sub>2</sub> (1.0 mmol, 0.5 equiv), arylboronic acid (2.0 mmol, 1.0 equiv), PCy<sub>3</sub> (2 mol%), Pd(OAc)<sub>2</sub> (1 mol%), H<sub>2</sub>O (4.0 mmol, 2.0 equiv) and THF (8 mL). The mixture was stirred for 4 h at 80 °C. After the completion of the reaction, the reaction mixture was concentrated under reduced pressure. The crude residue was purified by flash chromatography using *n*-Pentane.

### 1-(*tert*-Butyl)-4-(1-phenylvinyl)benzene (**2f**):<sup>5</sup>

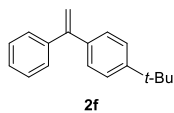

Prepared in accordance to the general procedure B to afford **2f** (168.5 mg, 71% yield) as colorless oil.

<sup>1</sup>H NMR (300 MHz, CDCl<sub>3</sub>) δ 7.38 – 7.26 (m, 9H), 5.46 (d, *J* = 1.5 Hz, 1H), 5.41 (d, *J* = 1.2 Hz, 1H), 1.34 (s, 9H).

<sup>13</sup>C NMR (75 MHz, CDCl<sub>3</sub>) δ 150.7, 149.8, 141.7, 138.4, 128.3, 128.1, 127.8, 127.6, 125.0, 113.7, 34.6, 31.3. GC-MS (EI, 70 eV): *m/z* (%) = 103 (50), 221 (100), 236 (50).

### 1-(1-Phenylvinyl)naphthalene (**2q**):<sup>3</sup>

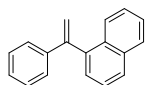

Prepared in accordance to the general procedure A to afford **2q** (504.4 mg, 55% yield) as white solid.

<sup>1</sup>H NMR (300 MHz, CDCl<sub>3</sub>) δ 7.91 (d, *J* = 8.1 Hz, 2H), 7.84 (d, *J* = 8.2 Hz, 1H), 7.56 (t, *J* = 7.2 Hz, 1H), 7.52 – 7.46 (m, 2H), 7.42 – 7.35 (m, 3H), 7.35 – 7.29 (m, 3H), 6.05 (d, *J* = 1.8 Hz, 1H), 5.46 (d, *J* = 1.5 Hz, 1H). <sup>13</sup>C NMR

(75 MHz, CDCl<sub>3</sub>) δ 148.4, 141.0, 139.8, 133.7, 131.8, 128.4, 128.2, 127.9, 127.7, 127.2, 126.6, 126.4, 125.8, 125.6, 125.4, 116.2. GC-MS (EI, 70 eV): *m/z* (%) = 152 (50), 229 (100), 230 (80).

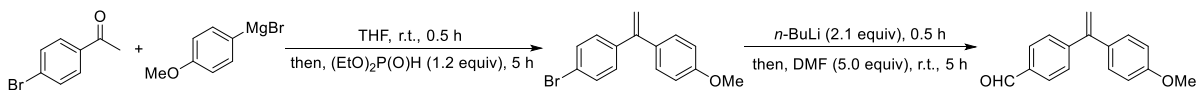

**General procedure C:** The Grignard solution in THF (10.0 mmol) was added dropwise to a solution of 1-(4-bromophenyl)ethan-1-one (5.0 mmol) in dry THF (20 mL) under a nitrogen atmosphere at room temperature. The reaction mixture was stirred for 0.5 h and the diethyl phosphite (6.0 mmol) was added. The mixture was stirred for 5 h. Then, the reaction mixture was added water and extracted with diethyl ether. The combined organic layer was dried over Na<sub>2</sub>SO<sub>4</sub>, filtered and concentrated under reduced pressure. 1-bromo-4-(1-(4-methoxyphenyl)vinyl)benzene was obtained by flash chromatography using *n*-Pentane/Ethyl acetate.

1-bromo-4-(1-(4-methoxyphenyl)vinyl)benzene (3.0 mmol) was dissolved in THF (12 mL) under a nitrogen atmosphere and cooled down to -78 °C. The *n*-BuLi (6.3 mmol, 2.1 equiv) was added dropwise over 10 min. The reaction mixture was stirred for 2 h at -78 °C before DMF (15.0 mmol) was added at once. The solution was allowed to room temperature slowly and stirred for 5 h. After the completion of the reaction, the mixture was added water and extracted with diethyl ether. The combined organic layer was dried over Na<sub>2</sub>SO<sub>4</sub>, filtered and concentrated under reduced pressure. The crude residue was purified by flash chromatography using *n*-Pentane/Ethyl acetate to afford

**2n.**

### 4-(1-(4-Methoxyphenyl)vinyl)benzaldehyde (**2n**)

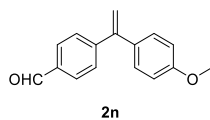

Prepared in accordance to the general procedure C to afford **2n** (364.1 mg, 51% yield) as white solid. <sup>1</sup>H NMR (400 MHz, CDCl<sub>3</sub>) δ 9.92 (s, 1H), 7.74 (dt, *J* = 8.0, 1.6 Hz, 2H), 7.40 (dt, *J* = 8.0, 1.6 Hz, 2H), 7.14

(dt,  $J = 8.8, 2.0$  Hz, 2H), 6.78 (dt,  $J = 8.8, 2.0$  Hz, 2H), 5.42 (d,  $J = 1.2$  Hz, 1H), 5.36 (d,  $J = 1.2$  Hz, 1H), 3.72 (s, 3H).  $^{13}\text{C}$  NMR (101 MHz,  $\text{CDCl}_3$ )  $\delta$  191.8, 159.5, 148.6, 147.9, 135.5, 132.9, 129.6, 129.3, 128.8, 115.0, 113.7, 55.2. HRMS (ESI) calcd for  $\text{C}_{16}\text{H}_{14}\text{O}_2$   $[\text{M}+\text{H}]^+$ : 239.1072, Found: 239.1073.

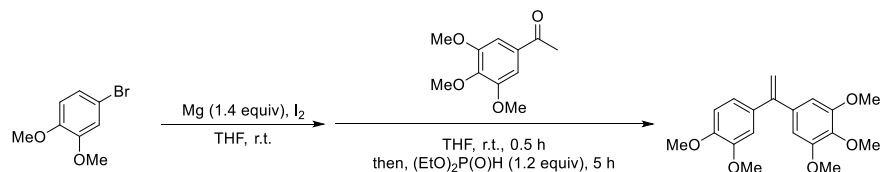

**General procedure D:** To an oven dried 25 mL schlenk tube equipped with a magnetic stir bar,  $\text{I}_2$  and activated magnesium turnings (7 mmol, 1.4 equiv) was added. The equipment was sealed with rubber septum, evacuated, and back filled with nitrogen. To the funnel was added the solution of 4-bromo-1,2-dimethoxybenzene (5.0 mmol, 1.0 equiv) in THF (5 ml) by syringe. The above solution was added dropwise at room temperature within 30 mins. After reaction at room temperature for 2 h, the Grignard solution in THF (5.0 mmol) was added dropwise to a solution of 1-(3,4,5-trimethoxyphenyl)ethan-1-one (2.5 mmol) in dry THF (10 mL) under a nitrogen atmosphere at room temperature. The reaction mixture was stirred for 0.5 h and the diethyl phosphite (3.0 mmol) was added. The mixture was stirred for 5 h. Then, the reaction mixture was added water and extracted with diethyl ether. The combined organic layer was dried over  $\text{Na}_2\text{SO}_4$ , filtered and concentrated under reduced pressure. The crude residue was purified by flash chromatography using *n*-Pentane/Ethyl acetate to afford **2o**.

#### 5-(1-(3,4-Dimethoxyphenyl)vinyl)-1,2,3-trimethoxybenzene (**2o**):

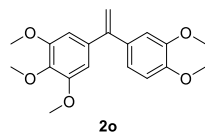

Prepared in accordance to the general procedure D to afford **2o** (780.0 mg, 47% yield) as colorless oil.  $^1\text{H}$  NMR (400 MHz,  $\text{CDCl}_3$ )  $\delta$  6.93 – 6.91 (m, 1H) 6.89 (d,  $J = 2.0$  Hz, 1H), 6.84 (d,  $J = 8.4$  Hz, 1H), 6.57 (s, 2H), 5.38 (d,  $J = 1.2$  Hz, 1H), 5.35 (d,  $J = 2.0$  Hz, 1H), 3.91 (s, 3H), 3.88 (s, 3H), 3.85 (s, 3H), 3.82 (s, 6H).  $^{13}\text{C}$  NMR (101 MHz,  $\text{CDCl}_3$ )  $\delta$  152.8, 149.7, 148.9, 148.5, 137.8, 137.3, 134.0, 121.0, 112.7, 111.4, 110.7, 105.6, 60.9, 56.1, 55.9, 55.9. HRMS (ESI) calcd for  $\text{C}_{19}\text{H}_{22}\text{O}_5$   $[\text{M}+\text{H}]^+$ : 331.1545, Found: 331.1549.

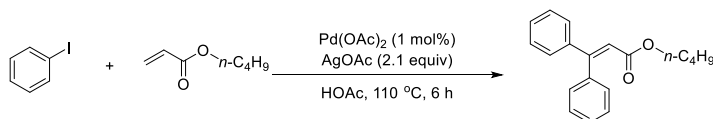

**General procedure E:**<sup>11</sup> A 10 mL round bottomed flask equipped with a magnetic stir bar was charged with butyl acrylate (2.0 mmol), iodobenzene (3.1 mmol),  $\text{Pd}(\text{OAc})_2$  (1 mol%),  $\text{AgOAc}$  (4.2 mmol) and acetic acid (6 mL). The mixture was stirred for 6 h at 110°C. After the completion of the reaction, the reaction mixture was diluted with water and extracted with ethyl acetate. The combined organic layer was dried over  $\text{Na}_2\text{SO}_4$ , filtered and concentrated under reduced pressure. The crude residue was purified by flash chromatography using *n*-Pentane/Ethyl acetate to afford **2t**.

### 3-(1-Phenylvinyl)thiophene(2t):<sup>11</sup>

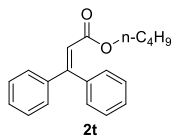

Prepared in accordance to the general procedure E to afford **2t** (100 mg, 24% yield) as colorless oil.

**<sup>1</sup>H NMR** (300 MHz, CDCl<sub>3</sub>) δ 7.44 – 7.40 (m, 3H), 7.40 – 7.32 (m, 5H), 7.29 – 7.22 (m, 2H), 6.41 (s, 1H), 4.04 (t, *J* = 6.6 Hz, 2H), 1.55 – 1.44 (m, 2H), 1.33 – 1.21 (m, 2H), 0.90 (t, *J* = 7.2 Hz, 3H). **<sup>13</sup>C NMR** (75 MHz, CDCl<sub>3</sub>) δ 166.2, 156.2, 140.8, 139.0, 129.3, 129.0, 128.3, 128.2, 128.0, 127.8, 117.5, 64.0, 30.4, 19.0, 13.6. **GC-MS** (EI, 70 eV): *m/z* (%) = 178 (100), 207 (80), 223 (50), 280 (30).

## 4. General procedure for the synthesis of $\alpha$ , $\beta$ -unsaturated ketones

A 4 mL screw-cap vial was charged with Katritzky salts (0.1 mmol), LiOMe (0.1 mmol) and an oven-dried stirring bar. The vial was closed by Teflon septum and phenolic cap and connected with atmosphere with a needle. After flushed the vials with argon and vacuum three times, styrenes (0.2 mmol), DBU (0.2 mmol) and dry THF (2 mL) were injected by syringe. The vial was fixed in an alloy plate and put into Paar 4560 series autoclave (500 mL) under argon atmosphere. At room temperature, the autoclave was flushed with carbon monoxide for three times and 50 bar of carbon monoxide was charged. The autoclave was reacted at 80 °C for 15 h. Afterwards, the pressure was carefully released. After removal of solvent under reduced pressure, pure product was obtained by column chromatography.

### 1-Cyclohexyl-3,3-diphenylprop-2-en-1-one (3aa):

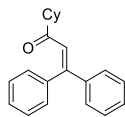

**3aa** Light cyan oil (21.5 mg, 74% yield), *R<sub>f</sub>* = 0.4 (*n*-Pentane/EtOAc = 50/1). **<sup>1</sup>H NMR** (400 MHz, CDCl<sub>3</sub>) δ 7.39 – 7.29 (m, 8H), 7.21 – 7.16 (m, 2H), 6.63 (s, 1H), 2.25 (tt, *J* = 11.2, 3.2 Hz, 1H), 1.83 – 1.70 (m, 4H), 1.63 – 1.59 (m, 1H), 1.39 – 1.23 (m, 3H), 1.16 – 1.11 (m, 2H). **<sup>13</sup>C NMR** (75 MHz, CDCl<sub>3</sub>) δ 204.8, 153.4, 141.2, 139.2, 129.4, 129.2, 128.4, 128.3, 128.3, 128.1, 125.4, 50.8, 28.7, 25.8, 25.7. **HRMS** (ESI) calcd for C<sub>21</sub>H<sub>22</sub>O [M+H]<sup>+</sup>: 290.1671, Found: 290.1672.

### 1-Cyclohexyl-3-phenyl-3-(*o*-tolyl)prop-2-en-1-one (3ab):

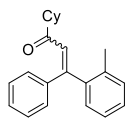

**3ab** Light cyan oil (20.1 mg, 66% yield, *E/Z* isomer: 85:15 based on NMR), *R<sub>f</sub>* = 0.4 (*n*-Pentane/EtOAc = 50/1). **<sup>1</sup>H NMR** (300 MHz, CDCl<sub>3</sub>) δ 7.35 – 7.28 (m, 5H), 7.28 – 7.14 (m, 3H), 7.06 – 7.02 (m, 1H), 6.81 (s, 0.85H),

6.25 (s, 0.15H), 2.31 – 2.22 (m, 1H), 2.08 (d,  $J = 0.9$  Hz, 0.45H), 2.06 (s, 2.55H), 1.82 – 1.60 (m, 5H), 1.39 – 1.19 (m, 3H), 1.18 – 1.11 (m, 2H).  $^{13}\text{C}$  NMR (75 MHz,  $\text{CDCl}_3$ )  $\delta$  203.9, 152.9, 139.8, 138.7, 135.6, 130.6, 130.0, 129.7, 129.3, 129.2, 128.7, 128.5, 128.3, 128.1, 127.9, 127.4, 125.7, 125.6, 125.2, 51.0, 50.7, 28.7, 28.3, 25.8, 25.7, 20.4, 19.6. HRMS (ESI) calcd for  $\text{C}_{22}\text{H}_{24}\text{O}$   $[\text{M}+\text{H}]^+$ : 305.1905, Found: 305.1901.

### 1-Cyclohexyl-3-phenyl-3-(*m*-tolyl)prop-2-en-1-one (3ac):

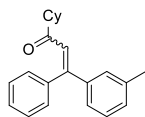

**3ac** Light cyan oil (19.7 mg, 65% yield, *E/Z* isomer: 50:50 based on NMR),  $R_f = 0.4$  (*n*-Pentane/EtOAc = 50/1).  $^1\text{H}$  NMR (300 MHz,  $\text{CDCl}_3$ )  $\delta$  7.39 – 7.29 (m, 4H), 7.28 – 7.15 (m, 3H), 7.14 – 7.06 (m, 1H), 7.01 – 6.97 (m, 1H), 6.61 (s, 0.5H), 6.59 (s, 0.5H), 2.35 (s, 1.5H), 2.33 (s, 1.5H), 2.28 – 2.19 (m, 1H), 1.83 – 1.68 (m, 4H), 1.63 – 1.57 (m, 1H), 1.39 – 1.24 (m, 3H), 1.16 – 1.09 (m, 2H).  $^{13}\text{C}$  NMR (75 MHz,  $\text{CDCl}_3$ )  $\delta$  205.2, 204.9, 153.7, 153.5, 141.35, 141.31, 139.3, 139.1, 138.0, 137.7, 130.0, 123.0, 129.3, 129.13, 129.14, 128.9, 128.4, 128.3, 128.21, 128.22, 128.01, 128.03, 126.5, 125.7, 125.6, 125.3, 50.8, 50.6, 28.8, 28.7, 25.8, 25.7, 21.4. HRMS (ESI) calcd for  $\text{C}_{22}\text{H}_{24}\text{O}$   $[\text{M}+\text{H}]^+$ : 305.1905, Found: 305.1905.

### 1-Cyclohexyl-3-phenyl-3-(*p*-tolyl)prop-2-en-1-one (3ad):

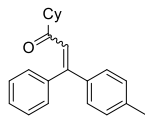

**3ad** Light cyan oil (24.9 mg, 82% yield, *E/Z* isomer: 57:43 based on NMR),  $R_f = 0.4$  (*n*-Pentane/EtOAc = 50/1).  $^1\text{H}$  NMR (300 MHz,  $\text{CDCl}_3$ )  $\delta$  7.40 – 7.29 (m, 4H), 7.22 – 7.14 (m, 4H), 7.12 – 7.05 (m, 1H), 6.61 (s, 0.57H), 6.58 (s, 0.43H), 2.39 (s, 1.3H), 2.36 (s, 1.7H), 2.34 – 2.18 (m, 1H), 1.85 – 1.69 (m, 4H), 1.63 – 1.59 (m, 1H), 1.38 – 1.26 (m, 3H), 1.16 – 1.10 (m, 2H).  $^{13}\text{C}$  NMR (75 MHz,  $\text{CDCl}_3$ )  $\delta$  204.9, 204.8, 153.8, 153.6, 141.6, 139.5, 139.4, 138.4, 138.3, 136.2, 129.4, 129.3, 129.1, 129.0, 128.8, 128.5, 128.31, 128.34, 128.2, 128.1, 125.1, 124.6, 50.80, 50.82, 28.7, 25.8, 25.7, 21.3, 21.2. HRMS (ESI) calcd for  $\text{C}_{22}\text{H}_{24}\text{O}$   $[\text{M}+\text{H}]^+$ : 305.1905, Found: 305.1906.

### 1-Cyclohexyl-3-(4-methoxyphenyl)-3-phenylprop-2-en-1-one (3ae):

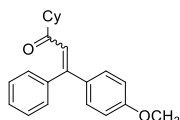

**3ae** Light cyan oil (23.3 mg, 75% yield, *E/Z* isomer: 50:50 based on NMR),  $R_f = 0.2$  (*n*-Pentane/EtOAc = 50/1).  $^1\text{H}$  NMR (400 MHz,  $\text{CDCl}_3$ )  $\delta$  7.28 – 7.16 (m, 4H), 7.14 – 7.11 (m, 1H), 7.07 – 6.98 (m, 2H), 6.80 – 6.70 (m, 2H), 6.46 (s, 0.5H), 6.41 (s, 0.5H), 3.72 (s, 1.5H), 3.69 (s, 1.5H), 2.21 – 2.07 (m, 1H), 1.72 – 1.57 (m, 4H), 1.52 – 1.46 (m, 1H), 1.23 – 1.13 (m, 3H), 1.05 – 0.98 (m, 2H).  $^{13}\text{C}$  NMR (75 MHz,  $\text{CDCl}_3$ )  $\delta$  204.9, 204.6, 160.6, 159.9, 153.6, 153.4, 141.9, 139.4, 133.6, 131.2, 131.1, 129.8, 129.3, 129.1, 128.6, 128.21, 128.23, 128.1, 124.9, 123.5,

113.7, 113.4, 55.3, 55.2, 50.9, 50.7, 28.8, 25.80, 25.81. **HRMS** (ESI) calcd for C<sub>22</sub>H<sub>24</sub>O<sub>2</sub> [M+H]<sup>+</sup>: 321.1855, Found: 321.1855.

### 3-(4-(*tert*-Butyl)phenyl)-1-cyclohexyl-3-phenylprop-2-en-1-one (3af):

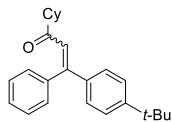

3af

Light cyan oil (24.8 mg, 72% yield, *E/Z* isomer: 58:42 based on NMR),  $R_f = 0.4$  (*n*-Pentane/EtOAc = 50/1). **<sup>1</sup>H NMR** (300 MHz, CDCl<sub>3</sub>)  $\delta$  7.43 – 7.33 (m, 6H), 7.29 – 7.27 (m, 1H), 7.22 – 7.19 (m, 1H), 7.17 – 7.11 (m, 1H), 6.66 (s, 0.58H), 6.58 (s, 0.42H), 2.30 – 2.15 (m, 1H), 1.88 – 1.53 (m, 6H), 1.37 (s, 3.5H), 1.34 (s, 5.5H), 1.31 – 1.27 (m, 1H), 1.20 – 1.02 (m, 3H). **<sup>13</sup>C NMR** (75 MHz, CDCl<sub>3</sub>)  $\delta$  205.5, 204.7, 153.6, 153.5, 152.7, 151.6, 141.5, 139.3, 138.2, 136.0, 129.4, 129.3, 129.1, 128.5, 128.3, 128.2, 128.11, 128.13, 125.7, 125.3, 125.0, 124.6, 50.8, 50.6, 34.7, 34.6, 31.3, 31.2, 28.9, 28.7, 25.80, 25.81, 25.82, 25.7. **HRMS** (ESI) calcd for C<sub>25</sub>H<sub>30</sub>O [M+H]<sup>+</sup>: 347.2375, Found: 347.2368.

### 1-Cyclohexyl-3-phenyl-3-(4-(trifluoromethyl)phenyl)prop-2-en-1-one (3ag):

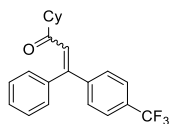

3ag

Yellow solid (26.4 mg, 74% yield, *E/Z* isomer: 50:50 based on NMR),  $R_f = 0.3$  (*n*-Pentane/EtOAc = 50/1). **<sup>1</sup>H NMR** (300 MHz, CDCl<sub>3</sub>)  $\delta$  7.65 – 7.56 (m, 2H), 7.43 – 7.25 (m, 6H), 7.20 – 7.13 (m, 1H), 6.76 (s, 0.5H), 6.63 (s, 0.5H), 2.38 (tt,  $J = 11.1, 3.0$  Hz, 0.5H), 2.26 (tt,  $J = 11.4, 3.3$  Hz, 0.5H), 1.89 – 1.74 (m, 4H), 1.68 – 1.59 (m, 1H), 1.37 – 1.23 (m, 3H), 1.21 – 1.11 (m, 2H). **<sup>13</sup>C NMR** (75 MHz, CDCl<sub>3</sub>)  $\delta$  204.8, 203.4, 152.6, 151.5, 144.8, 143.0, 140.4, 138.3, 131.1, 130.7, 130.2, 129.8, 129.6, 129.5, 129.3, 128.7, 128.6, 128.5, 128.3, 128.2, 127.1, 125.9, 125.3 (q,  $J = 3.8$  Hz), 125.2, 125.1 (q,  $J = 3.8$  Hz), 122.3, 51.4, 50.8, 28.6, 28.5, 25.8, 25.70, 25.71. **<sup>19</sup>F NMR** (282 MHz, CDCl<sub>3</sub>)  $\delta$  -62.5, -62.7. **HRMS** (ESI) calcd for C<sub>22</sub>H<sub>21</sub>F<sub>3</sub>O [M+H]<sup>+</sup>: 359.1623, Found: 359.1624.

### 1-Cyclohexyl-3-(4-fluorophenyl)-3-phenylprop-2-en-1-one (3ah):

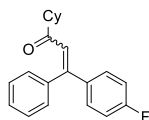

3ah

Light cyan oil (21.6 mg, 70% yield, *E/Z* isomer: 50:50 based on NMR),  $R_f = 0.3$  (*n*-Pentane/EtOAc = 50/1). **<sup>1</sup>H NMR** (300 MHz, CDCl<sub>3</sub>)  $\delta$  7.40 – 7.25 (m, 5H), 7.19 – 7.13 (m, 2H), 7.10 – 6.97 (m, 2H), 6.64 (s, 0.5H), 6.57 (s, 0.5H), 2.39 – 2.18 (m, 1H), 1.87 – 1.69 (m, 4H), 1.66 – 1.59 (m, 1H), 1.37 – 1.23 (m, 3H), 1.19 – 1.10 (m, 2H). **<sup>13</sup>C NMR** (75 MHz, CDCl<sub>3</sub>)  $\delta$  204.7, 204.2, 165.0, 164.4, 161.7, 161.1, 152.8, 152.4, 141.2, 139.0, 137.3, 135.0, 134.9, 131.3, 131.2, 130.3, 130.2, 129.4, 129.3, 128.5, 128.40, 128.41, 128.2, 125.21, 125.22, 115.5, 115.20, 115.21,

115.0, 51.1, 50.8, 28.7, 28.6, 25.80, 25.81, 25.7. **<sup>19</sup>F NMR** (282 MHz, CDCl<sub>3</sub>) δ -111.9, -113.2. **HRMS** (ESI) calcd for C<sub>21</sub>H<sub>21</sub>FO [M+H]<sup>+</sup>: 309.1655, Found: 309.1653.

### 3-(4-Chlorophenyl)-1-cyclohexyl-3-phenylprop-2-en-1-one (3ai):

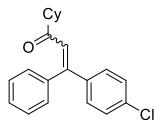

3ai

Light cyan oil (22.5 mg, 69% yield, *E/Z* isomer: 50:50 based on NMR), *R<sub>f</sub>* = 0.4 (*n*-Pentane/EtOAc = 50/1). **<sup>1</sup>H NMR** (400 MHz, CDCl<sub>3</sub>) δ 7.33 – 7.23 (m, 4H), 7.25 – 7.11 (m, 3H), 7.11 – 7.00 (m, 2H), 6.58 (s, 0.5H), 6.51 (s, 0.5H), 2.27 (tt, *J* = 11.6, 3.6 Hz, 0.5H), 2.16 (tt, *J* = 11.6, 3.6 Hz, 0.5H), 1.82 – 1.61 (m, 4H), 1.60 – 1.50 (m, 1H), 1.26 – 1.16 (m, 2H), 1.16 – 0.99 (m, 3H). **<sup>13</sup>C NMR** (101 MHz, CDCl<sub>3</sub>) δ 204.7, 203.9, 152.7, 152.1, 140.9, 139.7, 138.7, 137.5, 135.3, 134.2, 130.7, 129.6, 129.5, 129.3, 128.50, 128.51, 128.4, 128.31, 128.32, 128.2, 125.6, 125.1, 51.2, 50.8, 28.63, 28.61, 25.7. **HRMS** (ESI) calcd for C<sub>21</sub>H<sub>21</sub>OCl [M+H]<sup>+</sup>: 325.1359, Found: 325.1359.

### 3-(4-Bromophenyl)-1-cyclohexyl-3-phenylprop-2-en-1-one (3aj):

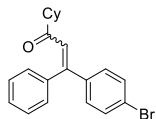

3aj

Light cyan oil (25.7 mg, 70% yield, *E/Z* isomer: 50:50 based on NMR), *R<sub>f</sub>* = 0.4 (*n*-Pentane/EtOAc = 50/1). **<sup>1</sup>H NMR** (300 MHz, CDCl<sub>3</sub>) δ 7.37 – 7.29 (m, 2H), 7.25 – 7.16 (m, 3H), 7.15 – 7.11 (m, 1H), 7.04 – 6.99 (m, 2H), 6.93 – 6.88 (m, 1H), 6.52 (s, 0.5H), 6.45 (s, 0.5H), 2.21 (tt, *J* = 12.0, 3.3 Hz, 0.5H), 2.09 (tt, *J* = 11.4, 3.3 Hz, 0.5H), 1.74 – 1.55 (m, 4H), 1.52 – 1.44 (m, 1H), 1.20 – 1.09 (m, 3H), 1.06 – 0.96 (m, 2H). **<sup>13</sup>C NMR** (75 MHz, CDCl<sub>3</sub>) δ 204.7, 203.8, 152.7, 152.1, 140.8, 140.2, 138.6, 138.0, 131.5, 131.3, 131.0, 129.9, 129.5, 129.3, 128.5, 128.4, 128.3, 128.2, 125.7, 125.0, 123.6, 122.5, 51.2, 50.8, 28.62, 28.61, 25.83, 25.81, 25.7, 25.6. **HRMS** (ESI) calcd for C<sub>21</sub>H<sub>21</sub>OBr [M+H]<sup>+</sup>: 369.0854, Found: 369.0849.

### 3-(2-Bromophenyl)-1-cyclohexyl-3-phenylprop-2-en-1-one (3ak):

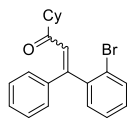

3ak

Light cyan oil (30.0 mg, 81% yield, *E/Z* isomer: 89:11 based on NMR), *R<sub>f</sub>* = 0.3 (*n*-Pentane/EtOAc = 50/1). **<sup>1</sup>H NMR** (300 MHz, CDCl<sub>3</sub>) δ 7.56 – 7.53 (m, 1H), 7.28 – 7.24 (m, 5H), 7.21 – 7.13 (m, 2H), 7.08 – 7.05 (m, 1H), 6.79 (s, 0.89H), 6.23 (s, 0.11H), 2.31 (tt, *J* = 11.1, 3.3 Hz, 0.91H), 2.23 – 2.17 (m, 0.14H), 1.83 – 1.67 (m, 4H), 1.59 – 1.50 (m, 1H), 1.24 – 1.17 (m, 2H), 1.15 – 1.03 (m, 3H). **<sup>13</sup>C NMR** (75 MHz, CDCl<sub>3</sub>) δ 202.7, 151.8, 140.3, 138.9, 132.8, 130.3, 129.5, 129.1, 128.6, 127.5, 127.2, 125.1, 122.3, 51.2, 28.63, 28.62, 28.2, 25.82, 25.81, 25.7. **HRMS** (ESI) calcd for C<sub>21</sub>H<sub>21</sub>OBr [M+H]<sup>+</sup>: 369.0854, Found: 369.0858.

### 1-Cyclohexyl-3,3-di-*p*-tolylprop-2-en-1-one (3al):

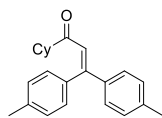

3al

White solid (22.9 mg, 72% yield),  $R_f = 0.3$  (*n*-Pentane/EtOAc = 50/1). **<sup>1</sup>H NMR** (300 MHz, CDCl<sub>3</sub>) δ 7.22 – 7.11 (m, 6H), 7.09 – 7.04 (m, 2H), 6.57 (s, 1H), 2.39 (s, 3H), 2.36 (s, 3H), 2.27 (tt,  $J = 11.4, 3.0$  Hz, 1H), 1.85 – 1.69 (m, 4H), 1.65 – 1.57 (m, 1H), 1.40 – 1.21 (m, 3H), 1.17 – 1.11 (m, 2H). **<sup>13</sup>C NMR** (75 MHz, CDCl<sub>3</sub>) δ 204.8, 153.9, 139.4, 138.7, 138.1, 136.3, 129.4, 129.0, 128.7, 128.4, 124.3, 50.8, 28.8, 25.82, 25.81, 21.3, 21.2. **HRMS** (ESI) calcd for C<sub>23</sub>H<sub>26</sub>O [M+H]<sup>+</sup>: 318.1984, Found: 318.1982.

### 1-Cyclohexyl-3,3-bis(4-methoxyphenyl)prop-2-en-1-one (3am):

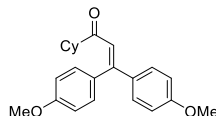

3am

Light cyan solid (21.7 mg, 62% yield),  $R_f = 0.3$  (*n*-Pentane/EtOAc = 20/1). **<sup>1</sup>H NMR** (300 MHz, CDCl<sub>3</sub>) δ 7.17 – 7.12 (m, 2H), 7.04 – 6.99 (m, 2H), 6.83 – 6.71 (m, 4H), 6.40 (s, 1H), 3.74 (s, 3H), 3.72 (s, 3H), 2.18 (tt,  $J = 11.4, 3.3$  Hz, 1H), 1.75 – 1.59 (m, 4H), 1.54 – 1.46 (m, 1H), 1.27 – 1.16 (m, 3H), 1.10 – 0.99 (m, 2H). **<sup>13</sup>C NMR** (75 MHz, CDCl<sub>3</sub>) δ 204.7, 160.6, 159.8, 153.6, 134.2, 131.5, 131.1, 130.1, 123.1, 113.6, 113.4, 55.3, 55.2, 50.8, 28.8, 25.82, 25.81. **HRMS** (ESI) calcd for C<sub>23</sub>H<sub>26</sub>O<sub>3</sub> [M+H]<sup>+</sup>: 351.1960, Found: 351.1955.

### 4-(3-Cyclohexyl-1-(4-methoxyphenyl)-3-oxoprop-1-en-1-yl)benzaldehyde (3an):

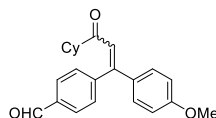

3an

Yellow oil (23.5 mg, 67% yield, *E/Z* isomer: 57:43 based on NMR),  $R_f = 0.4$  (*n*-Pentane/EtOAc = 20/1). **<sup>1</sup>H NMR** (300 MHz, CDCl<sub>3</sub>) δ 10.04 (s, 0.57H), 10.03 (s, 0.43H), 7.91 – 7.82 (m, 2H), 7.48 – 7.43 (m, 1H), 7.34 – 7.30 (m, 1H), 7.23 – 7.19 (m, 1H), 7.13 – 7.08 (m, 1H), 6.92 – 6.83 (m, 2H), 6.72 (s, 0.57H), 6.58 (s, 0.43H), 3.84 (s, 1.13H), 3.82 (s, 1.85H), 2.34 – 2.25 (m, 1H), 1.93 – 1.70 (m, 4H), 1.69 – 1.59 (m, 1H), 1.29 – 1.20 (m, 3H), 1.17 – 1.14 (m, 2H). **<sup>13</sup>C NMR** (75 MHz, CDCl<sub>3</sub>) δ 204.9, 203.1, 191.9, 191.6, 161.0, 160.1, 152.7, 151.6, 147.8, 146.4, 136.4, 135.6, 132.4, 131.1, 130.3, 129.7, 129.6, 129.5, 129.2, 128.7, 126.9, 122.9, 114.0, 113.7, 55.4, 55.3, 51.4, 50.9, 28.7, 28.5, 25.82, 25.81, 25.7. **HRMS** (ESI) calcd for C<sub>23</sub>H<sub>24</sub>O<sub>3</sub> [M+H]<sup>+</sup>: 349.1804, Found: 349.1806.



### 1-Cyclohexyl-3-(3,4-dimethoxyphenyl)-3-(3,4,5-trimethoxyphenyl)prop-2-en-1-one (3ao):

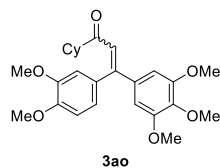

Light cyan oil (40.0 mg, 91% yield, *E/Z* isomer: 55:45 based on NMR),  $R_f = 0.3$  (*n*-Pentane/EtOAc = 5/1). **<sup>1</sup>H NMR** (300 MHz, CDCl<sub>3</sub>)  $\delta$  6.88 – 6.81 (m, 2H), 6.79 – 6.74 (m, 0.6H), 6.50 (s, 0.4H), 6.48 (s, 0.88H), 6.48 (s, 0.55H), 6.46 (s, 0.45H), 6.40 (s, 1.11H), 3.91 (s, 1.38H), 3.89 (s, 1.38H), 3.88 (s, 1.68H), 3.86 (s, 1.66H), 3.83 (s, 1.69H), 3.80 (s, 1.31H), 3.78 (s, 3H), 3.78 (s, 3H), 2.30 – 2.14 (m, 1H), 1.82 – 1.66 (m, 4H), 1.69 – 1.58 (m, 1H), 1.32 – 1.23 (m, 2H), 1.17 – 1.00 (m, 3H). **<sup>13</sup>C NMR** (75 MHz, CDCl<sub>3</sub>)  $\delta$  205.5, 205.3, 153.2, 152.92, 152.90, 152.8, 150.3, 149.4, 148.7, 148.4, 139.2, 138.2, 137.0, 134.7, 133.4, 131.3, 124.9, 124.3, 122.8, 122.0, 112.8, 111.0, 110.6, 110.5, 106.9, 106.0, 61.0, 60.9, 56.12, 56.11, 55.92, 55.91, 55.90, 55.8, 50.5, 50.4, 29.0, 28.9, 25.8, 25.7. **HRMS** (ESI) calcd for C<sub>26</sub>H<sub>32</sub>O<sub>6</sub> [M+H]<sup>+</sup>: 441.2277, Found: 441.2273.

### 1-Cyclohexyl-3-(naphthalen-2-yl)-3-phenylprop-2-en-1-one (3ap):

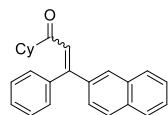

Light cyan oil (27.9 mg, 82% yield, *E/Z* isomer: 50:50 based on NMR),  $R_f = 0.3$  (*n*-Pentane/EtOAc = 50/1). **<sup>1</sup>H NMR** (300 MHz, CDCl<sub>3</sub>)  $\delta$  7.81 – 7.66 (m, 3H), 7.62 – 7.57 (m, 1H), 7.44 – 7.39 (m, 2H), 7.39 – 7.30 (m, 2H), 7.29 – 7.24 (m, 2H), 7.24 – 7.13 (m, 2H), 6.68 (s, 0.5H), 6.64 (s, 0.5H), 2.27 – 2.16 (m, 1H), 1.78 – 1.58 (m, 4H), 1.56 – 1.47 (m, 1H), 1.36 – 1.14 (m, 3H), 1.08 – 0.99 (m, 2H). **<sup>13</sup>C NMR** (75 MHz, CDCl<sub>3</sub>)  $\delta$  204.9, 204.7, 153.6, 153.4, 141.4, 139.2, 138.5, 136.7, 133.6, 133.1, 133.0, 129.5, 129.3, 128.7, 128.6, 128.42, 128.41, 128.21, 128.20, 128.0, 127.7, 127.62, 127.61, 127.4, 126.9, 126.41, 126.40, 126.2, 125.9, 125.6, 125.3, 51.0, 50.8, 28.72, 28.71, 25.82, 25.81, 25.7, 25.6. **HRMS** (ESI) calcd for C<sub>25</sub>H<sub>24</sub>O [M+H]<sup>+</sup>: 341.1905, Found: 341.1901.

### 1-Cyclohexyl-3-(naphthalen-1-yl)-3-phenylprop-2-en-1-one (3aq):

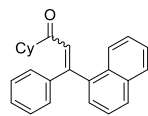

Light cyan oil (23.1 mg, 68% yield, *E/Z* isomer: 77:23 based on NMR),  $R_f = 0.3$  (*n*-Pentane/EtOAc = 50/1). **<sup>1</sup>H NMR** (400 MHz, CDCl<sub>3</sub>)  $\delta$  7.91 – 7.87 (m, 2.26H), 7.68 – 7.65 (m, 0.74H), 7.54 – 7.48 (m, 1H), 7.47 – 7.27 (m, 8H), 7.00 (d, *J* = 0.8 Hz, 0.77H), 6.47 (d, *J* = 0.8 Hz, 0.23H), 2.36 (tt, *J* = 11.6, 3.6 Hz, 0.23H), 2.13 (tt, *J* = 11.6, 2.8 Hz, 0.77H), 1.96 – 1.74 (m, 1H), 1.68 – 1.49 (m, 4H), 1.23 – 1.19 (m, 2H), 1.11 – 0.78 (m, 3H). **<sup>13</sup>C NMR** (101 MHz, CDCl<sub>3</sub>)  $\delta$  205.7, 204.1, 152.0, 151.6, 140.4, 140.1, 139.6, 136.9, 133.8, 133.5, 131.6, 131.2, 129.4, 129.3, 129.0, 128.8, 128.62, 128.61, 128.4, 128.3, 128.1, 127.51, 127.50, 127.3, 127.0, 126.6, 126.4, 126.3, 125.92, 125.91,

125.7, 125.6, 125.2, 125.1, 51.0, 50.5, 28.9, 28.7, 28.2, 25.8, 25.7, 25.6, 25.5. **HRMS** (ESI) calcd for C<sub>25</sub>H<sub>24</sub>O [M+H]<sup>+</sup>: 341.1905, Found: 341.1901.

### 1-Cyclohexyl-3-phenyl-3-(pyridin-3-yl)prop-2-en-1-one (3ar):

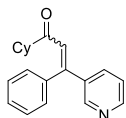

**3ar** Light cyan oil (17.9 mg, 61% yield, *E/Z* isomer: 50:50 based on NMR), *R<sub>f</sub>* = 0.2 (*n*-Pentane/EtOAc = 10/1). **<sup>1</sup>H NMR** (400 MHz, CDCl<sub>3</sub>) δ 8.54 (s, 1.3H), 8.34 (s, 0.6H), 7.51 – 7.44 (m, 1H), 7.35 – 7.27 (m, 3H), 7.27 – 7.17 (m, 2H), 7.12 – 7.07 (m, 1H), 6.71 (s, 0.5H), 6.55 (s, 0.5H), 2.33 (tt, *J* = 11.2, 3.2 Hz, 0.5H), 2.19 (tt, *J* = 11.2, 3.2 Hz, 0.5H), 1.85 – 1.77 (m, 1H), 1.76 – 1.63 (m, 3H), 1.61 – 1.52 (m, 1H), 1.26 – 1.18 (m, 2H), 1.16 – 1.00 (m, 3H). **<sup>13</sup>C NMR** (101 MHz, CDCl<sub>3</sub>) δ 204.5, 203.2, 150.4, 150.0, 149.3, 148.9, 148.8, 140.4, 138.0, 137.2, 135.7, 129.7, 129.3, 128.8, 128.6, 128.4, 128.2, 126.6, 125.7, 51.4, 50.8, 28.6, 28.4, 25.8, 25.7, 25.6. **HRMS** (ESI) calcd for C<sub>20</sub>H<sub>21</sub>NO [M+H]<sup>+</sup>: 292.1701, Found: 292.1702.

### 1-Cyclohexyl-3-phenyl-3-(thiophen-3-yl)prop-2-en-1-one (3as):

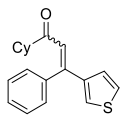

**3as** Light cyan oil (23.9 mg, 81% yield, *E/Z* isomer: 85:15 based on NMR), *R<sub>f</sub>* = 0.2 (*n*-Pentane/EtOAc = 50/1). **<sup>1</sup>H NMR** (300 MHz, CDCl<sub>3</sub>) δ 7.36 – 7.33 (m, 2H), 7.32 – 7.26 (m, 2H), 7.24 – 7.22 (m, 1H), 7.20 – 7.15 (m, 2H), 6.98 (dd, *J* = 3.0, 1.5 Hz, 0.85H), 6.92 (dd, *J* = 4.8, 1.5 Hz, 0.15H), 6.62 (s, 0.85H), 6.48 (s, 0.15H), 2.32 – 2.26 (m, 0.15H), 2.21 – 2.12 (m, 0.9H), 1.76 – 1.64 (m, 4H), 1.56 – 1.51 (m, 1H), 1.29 – 1.12 (m, 2H), 1.13 – 0.99 (m, 3H). **<sup>13</sup>C NMR** (75 MHz, CDCl<sub>3</sub>) δ 205.0, 204.5, 147.8, 143.1, 141.5, 139.1, 129.2, 128.7, 128.32, 128.31, 128.11, 128.10, 127.7, 126.8, 126.2, 125.8, 125.0, 123.5, 50.9, 50.7, 28.8, 28.7, 25.82, 25.81, 25.80, 25.7. **HRMS** (ESI) calcd for C<sub>19</sub>H<sub>20</sub>OS [M+H]<sup>+</sup>: 297.1313, Found: 297.1312.

### 1-Cycloheptyl-3,3-diphenylprop-2-en-1-one (3at):

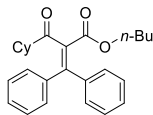

**3at** Colorless oil (27.0 mg, 69% yield), *R<sub>f</sub>* = 0.2 (*n*-Pentane/EtOAc = 50/1). **<sup>1</sup>H NMR** (300 MHz, CDCl<sub>3</sub>) δ 7.41 – 7.29 (m, 6H), 7.24 – 7.11 (m, 4H), 3.97 (t, *J* = 6.6 Hz, 2H), 1.94 (tt, *J* = 11.4, 3.0 Hz, 1H), 1.74 – 1.62 (m, 4H), 1.57 – 1.46 (m, 1H), 1.39 – 1.26 (m, 4H), 1.18 – 1.04 (m, 3H), 0.98 – 0.87 (m, 2H), 0.80 (t, *J* = 7.2 Hz, 3H). **<sup>13</sup>C NMR** (75 MHz, CDCl<sub>3</sub>) δ 207.0, 167.3, 151.7, 140.3, 139.6, 134.3, 130.0, 129.5, 129.2, 129.0, 128.4, 128.2, 65.0, 50.8, 30.1, 28.8, 25.7, 25.6, 18.8, 13.6. **HRMS** (ESI) calcd for C<sub>26</sub>H<sub>30</sub>O<sub>3</sub> [M+H]<sup>+</sup>: 391.2273, Found: 391.2270.

### 1-Cyclohexyl-3-(4-methoxyphenyl)but-2-en-1-one (3au):

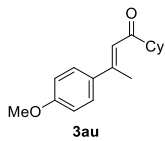

Light cyan oil (11.0 mg, 43% yield),  $R_f = 0.3$  (*n*-Pentane/EtOAc = 50/1).  $^1\text{H NMR}$  (400 MHz,  $\text{CDCl}_3$ )  $\delta$  7.47 (dt,  $J = 9.2, 2.4$  Hz, 2H), 6.90 (dt,  $J = 8.8, 2.4$  Hz, 1H), 6.53 (q,  $J = 1.2$  Hz, 1H), 3.84 (s, 3H), 2.52 (d,  $J = 1.2$  Hz, 3H), 2.43 (tt,  $J = 11.2, 3.2$  Hz, 1H), 1.94 – 1.85 (m, 2H), 1.85 – 1.77 (m, 2H), 1.70 – 1.66 (m, 1H), 1.41 – 1.23 (m, 5H).  $^{13}\text{C NMR}$  (101 MHz,  $\text{CDCl}_3$ )  $\delta$  204.5, 160.4, 153.6, 134.9, 127.9, 122.0, 113.9, 55.4, 52.2, 28.8, 26.0, 25.9, 18.2. **HRMS** (ESI) calcd for  $\text{C}_{17}\text{H}_{22}\text{O}_2$   $[\text{M}+\text{H}]^+$ : 259.1698, Found: 259.1700.

### 1-Cycloheptyl-3,3-diphenylprop-2-en-1-one (3ba):

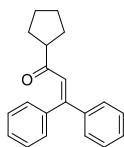

Light cyan oil (20.4 mg, 74% yield),  $R_f = 0.4$  (*n*-Pentane/EtOAc = 50/1).  $^1\text{H NMR}$  (300 MHz,  $\text{CDCl}_3$ )  $\delta$  7.44 – 7.29 (m, 8H), 7.24 – 7.15 (m, 2H), 6.65 (s, 1H), 2.91 – 2.76 (m, 1H), 1.82 – 1.48 (m, 8H).  $^{13}\text{C NMR}$  (75 MHz,  $\text{CDCl}_3$ )  $\delta$  204.2, 153.3, 141.3, 139.1, 129.4, 129.2, 128.4, 128.32, 128.31, 128.1, 125.8, 51.7, 29.4, 26.1. **HRMS** (ESI) calcd for  $\text{C}_{20}\text{H}_{20}\text{O}$   $[\text{M}+\text{H}]^+$ : 277.1592, Found: 277.1593.

### 1-Cycloheptyl-3,3-diphenylprop-2-en-1-one (3ca):

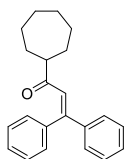

Light cyan oil (10.7 mg, 35% yield),  $R_f = 0.3$  (*n*-Pentane/EtOAc = 50/1).  $^1\text{H NMR}$  (400 MHz,  $\text{CDCl}_3$ )  $\delta$  7.40 – 7.28 (m, 8H), 7.21 – 7.15 (m, 2H), 6.60 (s, 1H), 2.43 (tt,  $J = 10.0, 4.0$  Hz, 1H), 1.85 – 1.78 (m, 2H), 1.70 – 1.62 (m, 2H), 1.58 – 1.49 (m, 2H), 1.49 – 1.42 (m, 4H), 1.34 – 1.26 (m, 2H).  $^{13}\text{C NMR}$  (101 MHz,  $\text{CDCl}_3$ )  $\delta$  205.4, 153.3, 141.3, 139.2, 129.4, 129.2, 128.4, 128.3, 128.2, 125.8, 52.0, 30.2, 28.2, 26.8. **HRMS** (ESI) calcd for  $\text{C}_{22}\text{H}_{24}\text{O}$   $[\text{M}+\text{H}]^+$ : 305.1905, Found: 305.1905.

### 4-Methyl-1,1-diphenylpent-1-en-3-one (3da):

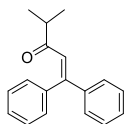

Light cyan oil (14.6 mg, 58% yield),  $R_f = 0.5$  (*n*-Pentane/EtOAc = 50/1).  $^1\text{H NMR}$  (300 MHz,  $\text{CDCl}_3$ )  $\delta$  7.39 – 7.29 (m, 8H), 7.21 – 7.16 (m, 2H), 6.64 (s, 1H), 2.61 – 2.52 (m, 1H), 1.06 (d,  $J = 6.9$  Hz, 6H).  $^{13}\text{C NMR}$  (75

MHz, CDCl<sub>3</sub>)  $\delta$  205.4, 153.6, 141.3, 139.1, 129.4, 129.2, 128.41, 128.40, 128.1, 125.0, 40.9, 18.4. **HRMS** (ESI) calcd for C<sub>18</sub>H<sub>18</sub>O [M+H]<sup>+</sup>: 251.1436, Found: 251.1433.

#### 4-Methyl-1,1-diphenylnon-1-en-3-one (3ea):

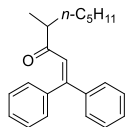

**3ea** Light cyan oil (23.1 mg, 69% yield),  $R_f = 0.4$  (*n*-Pentane/EtOAc = 50/1). **<sup>1</sup>H NMR** (400 MHz, CDCl<sub>3</sub>)  $\delta$  7.39 – 7.28 (m, 8H), 7.19 – 7.16 (m, 2H), 6.62 (s, 1H), 2.49 – 2.41 (m, 1H), 1.69 – 1.59 (m, 1H), 1.30 – 1.16 (m, 7H), 1.02 (d,  $J = 7.2$  Hz, 3H), 0.87 (t,  $J = 6.8$  Hz, 3H). **<sup>13</sup>C NMR** (101 MHz, CDCl<sub>3</sub>)  $\delta$  205.5, 153.5, 141.3, 139.1, 129.4, 129.2, 128.41, 128.40, 128.1, 125.5, 46.2, 33.3, 31.8, 27.0, 22.5, 16.3, 14.0. **HRMS** (ESI) calcd for C<sub>22</sub>H<sub>26</sub>O [M+H]<sup>+</sup>: 307.2062, Found: 307.2062.

#### 4-Cyclohexyl-1,1-diphenylpent-1-en-3-one (3fa):

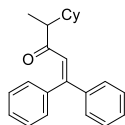

**3fa** Yellow oil (19.6 mg, 62% yield),  $R_f = 0.3$  (*n*-Pentane/EtOAc = 50/1). **<sup>1</sup>H NMR** (300 MHz, CDCl<sub>3</sub>)  $\delta$  7.39 – 7.30 (m, 8H), 7.20 – 7.16 (m, 2H), 6.62 (s, 1H), 2.37 – 2.28 (m, 1H), 1.78 – 1.52 (m, 7H), 1.28 – 1.05 (m, 4H), 0.96 (d,  $J = 6.9$  Hz, 3H). **<sup>13</sup>C NMR** (75 MHz, CDCl<sub>3</sub>)  $\delta$  205.2, 153.3, 141.4, 139.2, 129.4, 129.2, 128.41, 128.40, 128.3, 128.1, 125.9, 51.9, 40.5, 31.8, 29.3, 26.5, 26.4, 12.9. **HRMS** (ESI) calcd for C<sub>23</sub>H<sub>26</sub>O [M+H]<sup>+</sup>: 319.2062, Found: 319.2062.

#### 4-Methyl-1,1,6-triphenylhex-1-en-3-one (3ga):

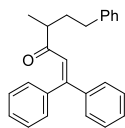

**3ga** Yellow oil (30.4 mg, 89% yield),  $R_f = 0.3$  (*n*-Pentane/EtOAc = 50/1). **<sup>1</sup>H NMR** (300 MHz, CDCl<sub>3</sub>)  $\delta$  7.31 – 7.23 (m, 6H), 7.23 – 7.16 (m, 4H), 7.12 – 7.04 (m, 5H), 6.52 (s, 1H), 2.49 – 2.37 (m, 3H), 1.97 – 1.84 (m, 1H), 1.58 – 1.48 (m, 1H), 1.00 (d,  $J = 6.9$  Hz, 3H). **<sup>13</sup>C NMR** (75 MHz, CDCl<sub>3</sub>)  $\delta$  204.8, 154.0, 141.9, 141.2, 139.0, 129.4, 129.3, 128.42, 128.41, 128.40, 128.3, 128.1, 125.8, 125.3, 45.6, 34.8, 33.5, 16.4. **HRMS** (ESI) calcd for C<sub>25</sub>H<sub>24</sub>O [M+H]<sup>+</sup>: 341.1905, Found: 341.1910.

### 5-(4-Methoxyphenyl)-4-methyl-1,1-diphenylpent-1-en-3-one (3ha):

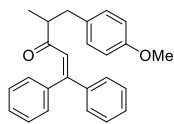

3ha

Light cyan liquid (14.3 mg, 40% yield),  $R_f = 0.2$  (*n*-Pentane/EtOAc = 50/1).  **$^1\text{H NMR}$**  (400 MHz,  $\text{CDCl}_3$ )  $\delta$  7.41 – 7.28 (m, 6H), 7.20 – 7.12 (m, 4H), 6.97 – 6.94 (m, 2H), 6.82 – 6.79 (m, 2H), 6.45 (s, 1H), 3.79 (s, 3H), 2.84 (dd,  $J = 13.6, 6.8$  Hz, 1H), 2.74 – 2.68 (m, 1H), 2.49 (dd,  $J = 13.2, 7.6$  Hz, 1H), 1.00 (d,  $J = 6.8$  Hz, 3H).  **$^{13}\text{C NMR}$**  (101 MHz,  $\text{CDCl}_3$ )  $\delta$  205.5, 158.0, 153.4, 141.2, 139.1, 131.9, 123.0, 129.5, 129.2, 128.51, 128.50, 128.3, 128.2, 126.1, 113.7, 55.2, 48.1, 38.7, 16.5. **HRMS** (ESI) calcd for  $\text{C}_{25}\text{H}_{24}\text{O}_2$   $[\text{M}+\text{H}]^+$ : 357.1855, Found: 357.1853.

### Acetic 4-(3,3-diphenylacryloyl)piperidine-1-carboxylic anhydride (3ia):

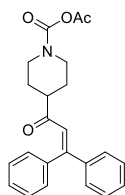

3ia

Light cyan liquid (27.0 mg, 74% yield),  $R_f = 0.4$  (*n*-Pentane/EtOAc = 10/1).  **$^1\text{H NMR}$**  (300 MHz,  $\text{CDCl}_3$ )  $\delta$  7.40 – 7.28 (m, 8H), 7.20 – 7.16 (m, 2H), 6.61 (s, 1H), 4.17 – 4.12 (m, 2H), 4.09 (t,  $J = 7.2$  Hz, 2H), 2.71 – 2.58 (m, 2H), 2.36 (tt,  $J = 11.1, 3.6$  Hz, 1H), 1.75 – 1.69 (m, 2H), 1.58 – 1.45 (m, 2H), 1.23 (t,  $J = 6.9$  Hz, 3H).  **$^{13}\text{C NMR}$**  (75 MHz,  $\text{CDCl}_3$ )  $\delta$  202.7, 155.4, 154.5, 140.8, 139.0, 129.5, 129.3, 128.6, 128.41, 128.40, 128.2, 124.7, 61.2, 48.2, 43.3, 27.6, 14.6. **HRMS** (ESI) calcd for  $\text{C}_{23}\text{H}_{25}\text{NO}_3$   $[\text{M}+\text{H}]^+$ : 364.1913, Found: 364.1912.

### 6-(4-Hydroxyphenyl)-4-methyl-1,1-diphenylhex-1-en-3-one (3ja):

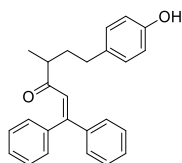

3ja

Light cyan liquid (16.6 mg, 47% yield),  $R_f = 0.4$  (*n*-Pentane/EtOAc = 5/1).  **$^1\text{H NMR}$**  (400 MHz,  $\text{CDCl}_3$ )  $\delta$  7.39 – 7.28 (m, 8H), 7.20 – 7.14 (m, 2H), 6.98 (d,  $J = 8.4$  Hz, 2H), 6.71 (dt,  $J = 8.4, 2.4$  Hz, 2H), 6.61 (d,  $J = 0.8$  Hz, 1H), 2.54 – 2.40 (m, 3H), 2.00 – 1.90 (m, 1H), 1.61 – 1.52 (m, 1H), 1.09 (d,  $J = 6.8$  Hz, 3H).  **$^{13}\text{C NMR}$**  (101 MHz,  $\text{CDCl}_3$ )  $\delta$  205.6, 205.5, 154.3, 153.9, 153.9, 141.2, 139.0, 133.9, 133.8, 129.41, 129.40, 128.52, 128.51, 128.4, 128.2, 125.3, 115.3, 45.6, 35.2, 32.6, 16.5. **HRMS** (ESI) calcd for  $\text{C}_{25}\text{H}_{24}\text{O}_2$   $[\text{M}+\text{H}]^+$ : 357.1855, Found: 357.1858.

### 1-(4-Hydroxycyclohexyl)-3,3-diphenylprop-2-en-1-one (3ka):

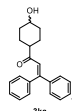

Light cyan liquid (18.7 mg, 61% yield).

Major isomer:  $R_f = 0.2$  (*n*-Pentane/EtOAc = 2/1),  $^1\text{H NMR}$  (400 MHz,  $\text{CDCl}_3$ )  $\delta$  7.40 – 7.28 (m, 8H), 7.20 – 7.16 (m, 2H), 6.61 (s, 1H), 3.53 (tt,  $J = 8.1, 3.3$  Hz, 1H), 2.19 (tt,  $J = 8.4, 3.6$  Hz, 1H), 2.02 – 1.93 (m, 2H), 1.88 – 1.79 (m, 2H), 1.44 – 1.34 (m, 2H), 1.14 – 1.04 (m, 2H).  $^{13}\text{C NMR}$  (101 MHz,  $\text{CDCl}_3$ ) 204.3, 154.0, 141.0, 139.0, 129.4, 129.3, 128.5, 128.41, 128.40, 128.2, 125.3, 70.0, 49.4, 34.7, 26.9. **HRMS** (ESI) calcd for  $\text{C}_{21}\text{H}_{22}\text{O}_2$   $[\text{M}+\text{H}]^+$ : 307.1698, Found: 307.1697.

Minor isomer:  $R_f = 0.3$  (*n*-Pentane/EtOAc = 2/1),  $^1\text{H NMR}$  (300 MHz,  $\text{CDCl}_3$ )  $\delta$  7.40 – 7.28 (m, 8H), 7.21 – 7.16 (m, 2H), 6.64 (s, 1H), 3.90 (tt,  $J = 4.5, 3.0$  Hz, 1H), 2.29 (tt,  $J = 9.9, 3.6$  Hz, 1H), 1.89 – 1.67 (m, 4H), 1.63 – 1.54 (m, 2H), 1.51 – 1.40 (m, 2H).  $^{13}\text{C NMR}$  (101 MHz,  $\text{CDCl}_3$ )  $\delta$  204.0, 153.7, 141.2, 139.1, 129.4, 129.3, 128.42, 128.41, 128.1, 125.0, 66.4, 49.1, 32.1, 22.9. **HRMS** (ESI) calcd for  $\text{C}_{21}\text{H}_{22}\text{O}_2$   $[\text{M}+\text{H}]^+$ : 307.1698, Found: 307.1700.

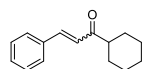

**GC-MS** (EI, 70 eV):  $m/z$  (%) = 77 (20), 103 (40), 131 (100), 214 (15).

## 5. Reference:

1. a) C. H. Basch, J. Liao, J. Xu, J. J. Piane and M. P. Watson, *J. Am. Chem. Soc.*, 2017, **139**, 5313; b) F. J. R. Klauck, M. J. James and F. Glorius, *Angew. Chem. Int. Ed.*, 2017, **56**, 12336; c) S. Plunkett, C. H. Basch, S. O. Santana and M. P. Watson, *J. Am. Chem. Soc.*, 2019, **141**, 2257; d) F. Sandfort, F. Strieth-Kalthoff, F. J. R. Klauck, M. J. James and F. Glorius, *Chem. Eur. J.*, 2018, **24**, 17210; d) S. A. Said and A. Fiksdahl, *Tetrahedron Asymm.*, 2001, **12**, 1947.
2. T. Wang, Y. Hu and S. Zhang, *Org. Biomol. Chem.*, 2010, **8**, 2312.
3. D. Ganapathy and G. Sekar, *Org. Lett.*, 2014, **16**, 3856.
4. H. Tan, I. Houpius, R. Liu, Y. Wang and Z. Chen, *Org. Lett.*, 2015, **17**, 3548.
5. J. C. L. Walker and M. Oestreich, *Org. Lett.*, 2018, **20**, 6411.
6. T. Vom Stein, M. Perez, R. Dobrovetsky, D. Winkelhaus, C. B. Caputo and D. W. Stephan, *Angew. Chem. Int. Ed.*, 2015, **54**, 10178.
7. Z. Cheng, W. Jin and C. Liu, *Org. Chem. Front.*, 2019, **6**, 841.
8. M. D. Ritz, A. M. Parsons, P. N. Palermo and W. D. Jones, *Polyhedron*, 2020, **180**, 114416.
9. C. Lei, Y. J. Yip and J. S. Zhou, *J. Am. Chem. Soc.*, 2017, **139**, 6086.
10. S. Rao, M. N. Joy and K. R. Prabhu, *J. Org. Chem.*, 2018, **83**, 13707.
11. D. Xu, C. Lu and W. Chen, *Tetrahedron*, 2012, **68**, 1466.

## 6. NMR Spectra of products: $^1\text{H}$ , $^{13}\text{C}$ and $^{19}\text{F}$ NMR

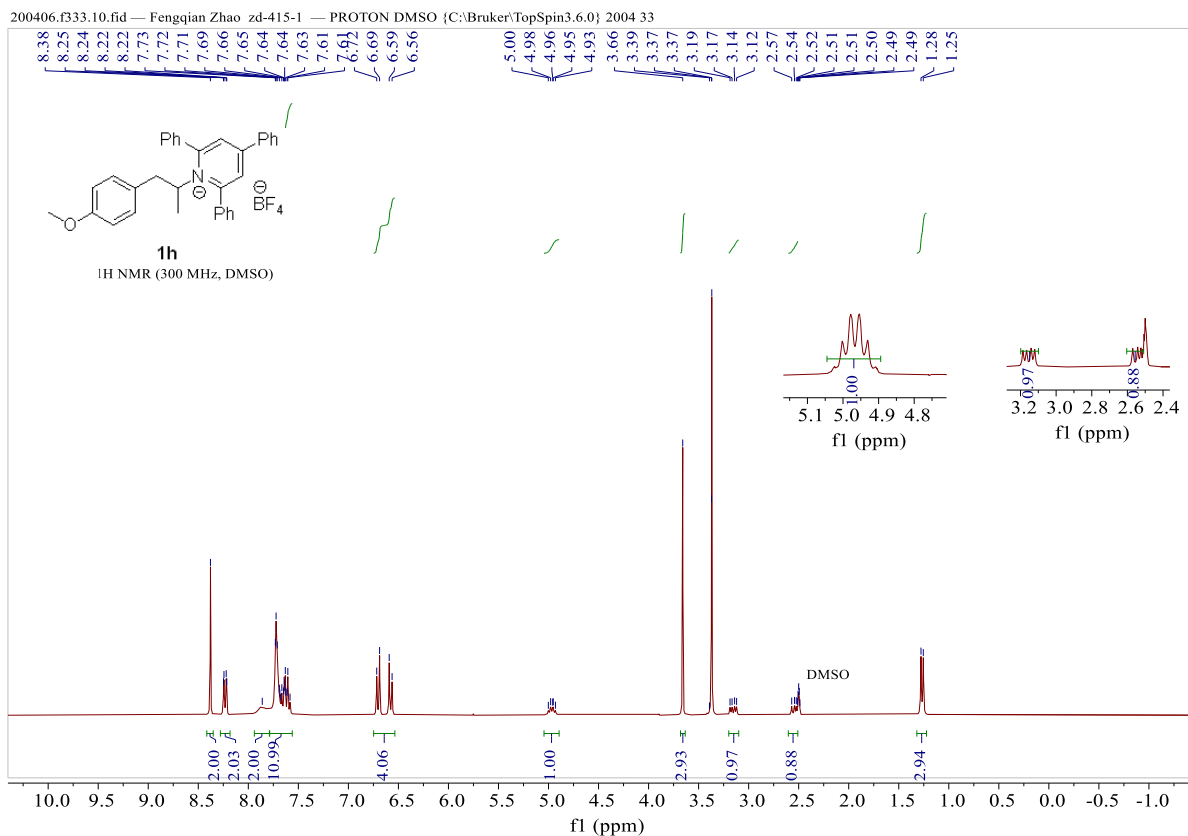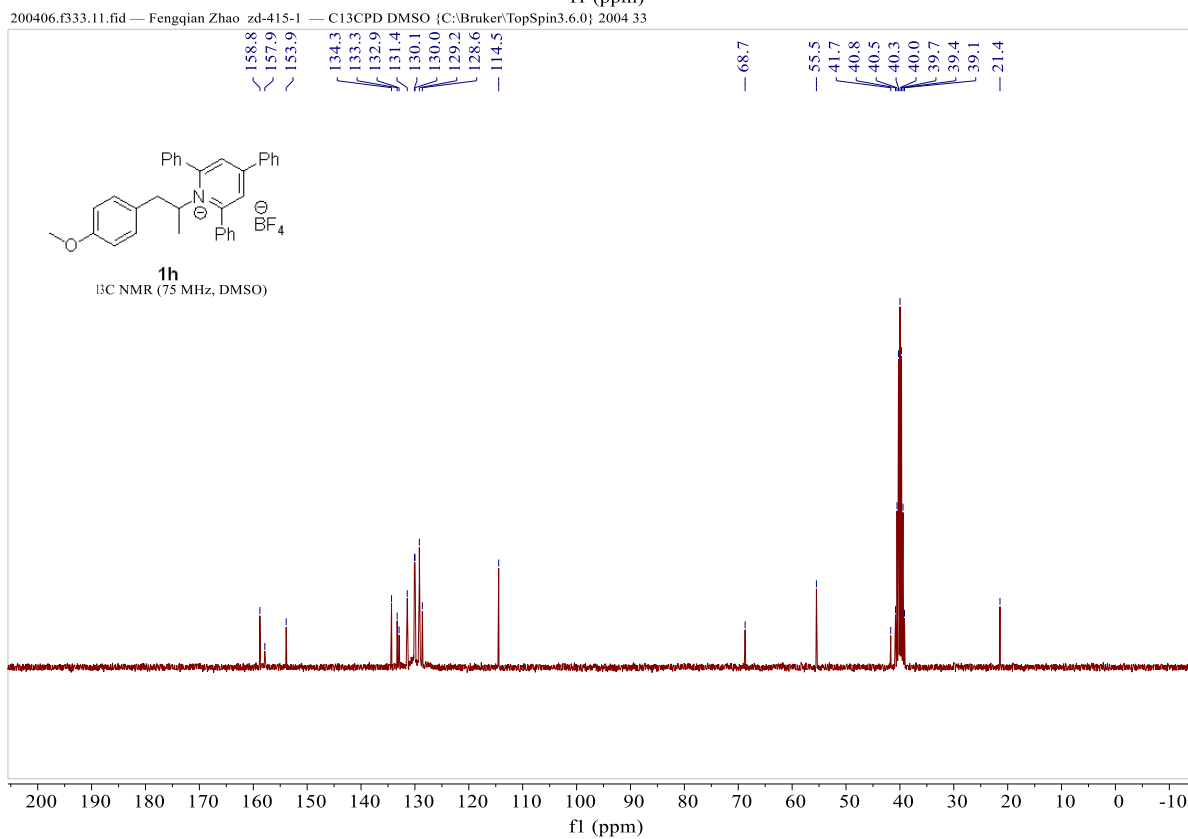





200420.f350.10.fid — Fengqian Zhao zd-415-3 — PROTON DMSO {C:\Bruker\TopSpin3.6.0} 2004 50

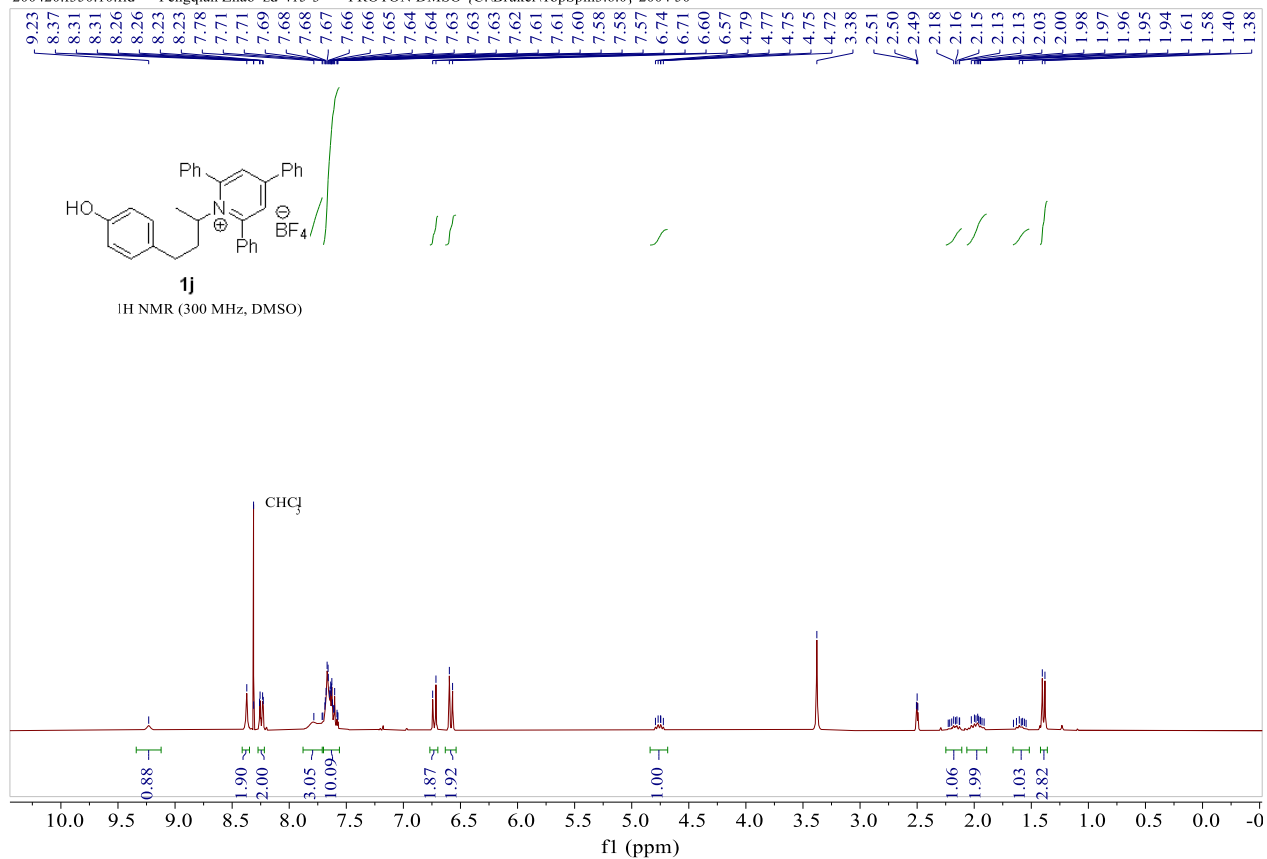

200420.f350.11.fid — Fengqian Zhao zd-415-3 — C13CPD DMSO {C:\Bruker\TopSpin3.6.0} 2004 50

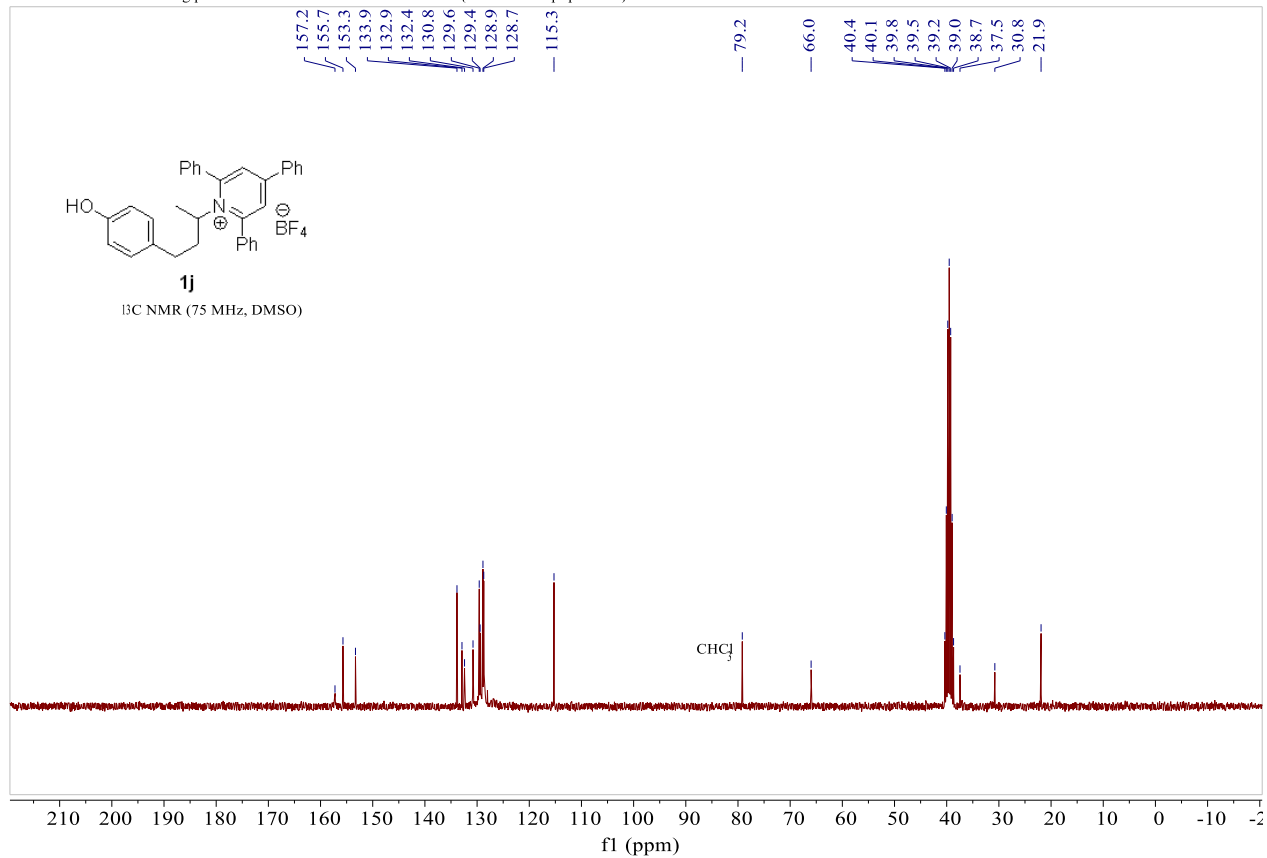

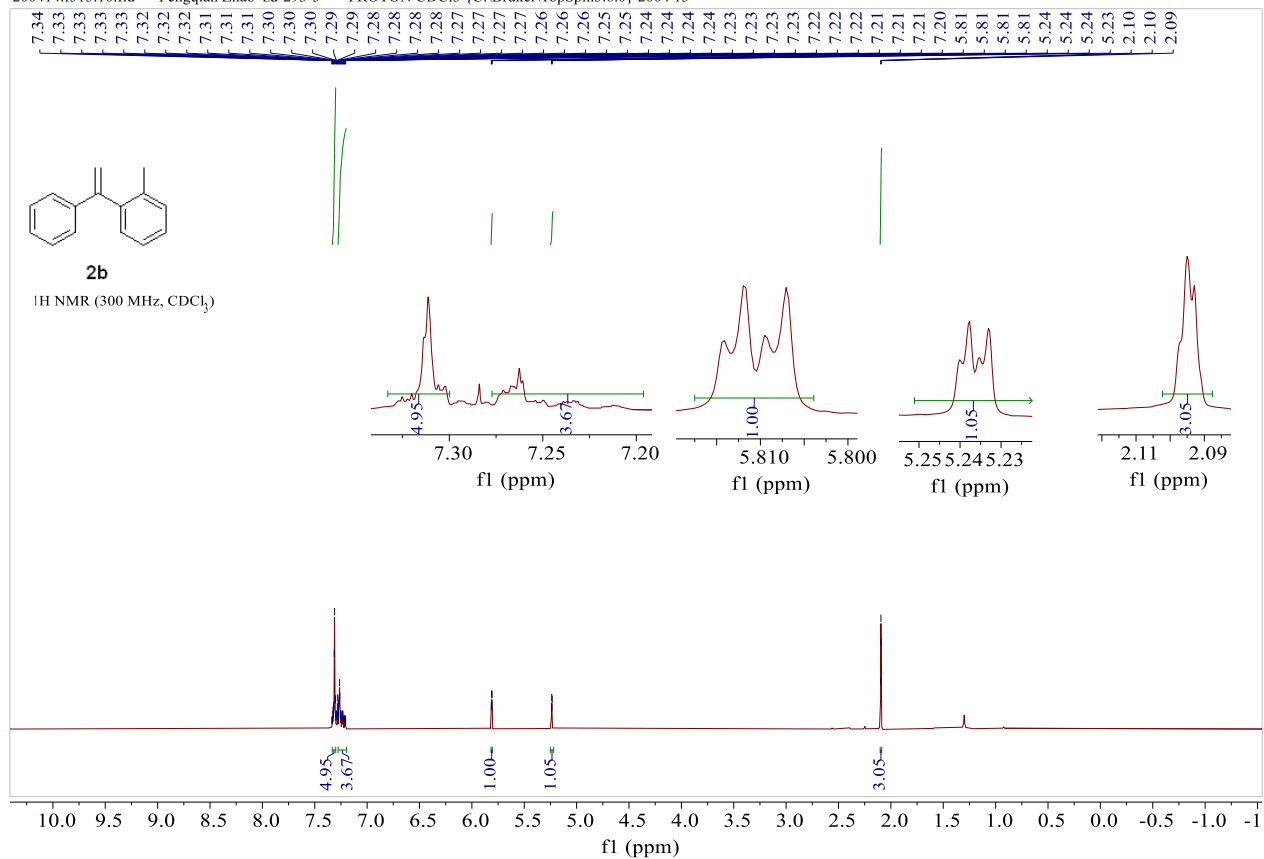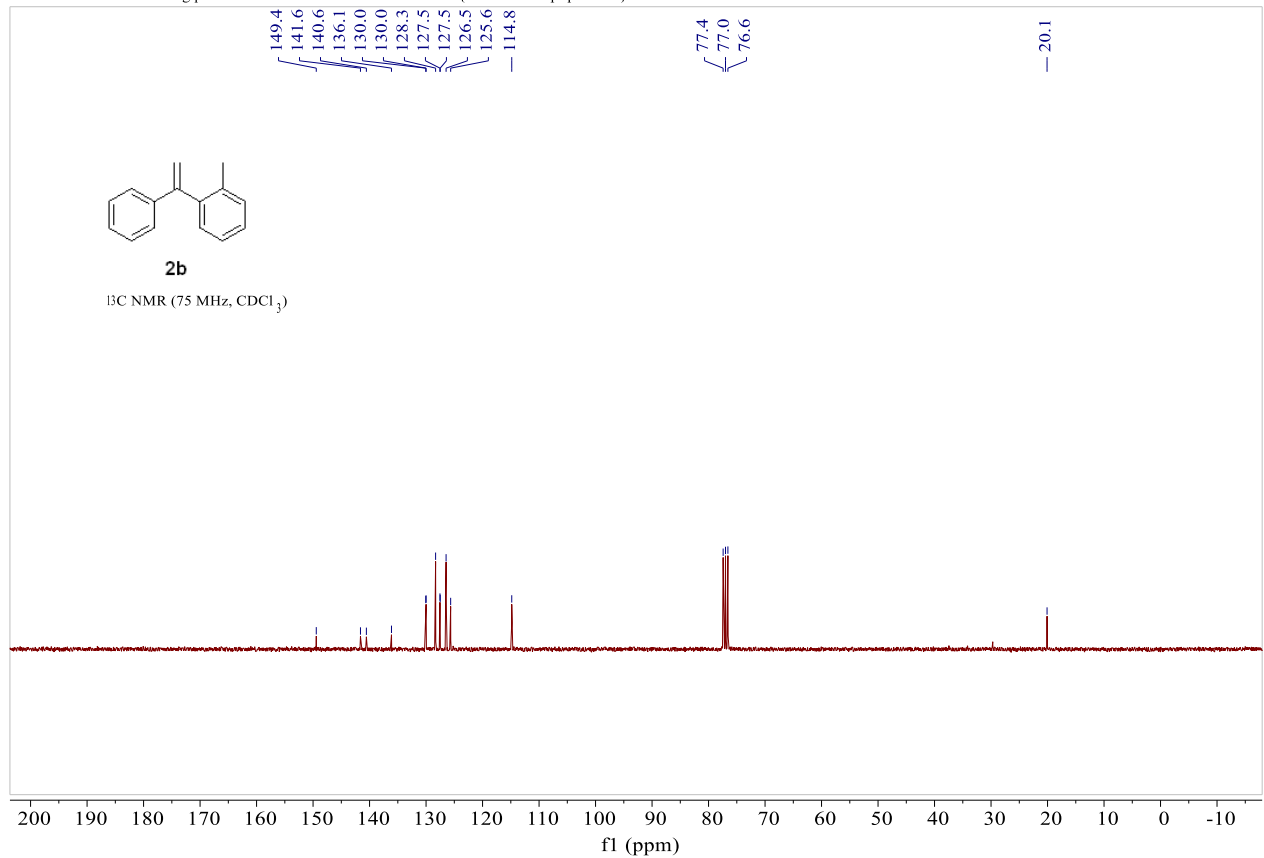

200131.408.10.fid — Fengqian Zhao zd-293-7 — Au1H CDCl3 {C:\Bruker\TopSpin3.5pl6} 2001 8

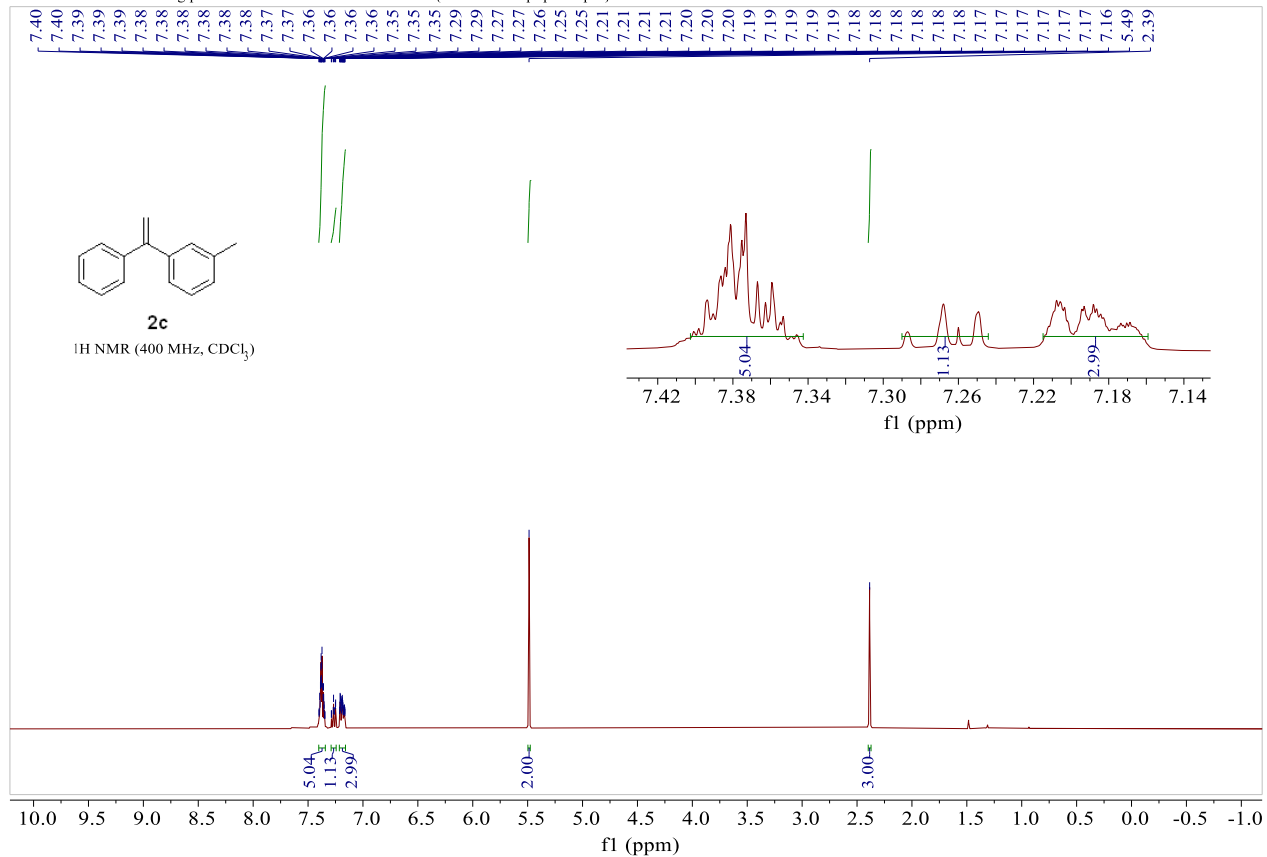

190203.f340.10.fid — Fengqian Zhao zd-293-7 — C13CPD CDCl3 {C:\Bruker\TopSpin3.6.0} 2002 40

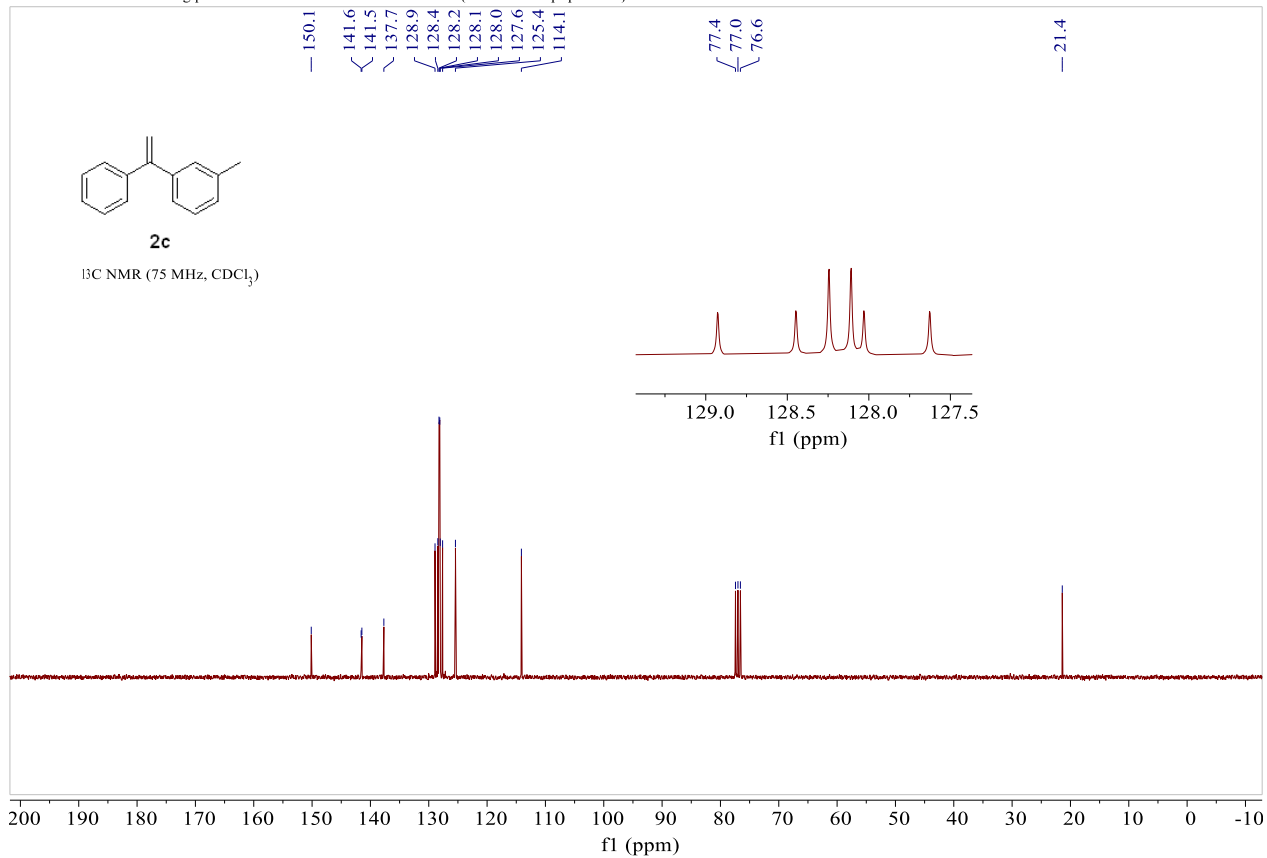

200127.318.10.fid — Fengqian Zhao zd-293-1 — Au1H CDCl3 {C:\Bruker\TopSpin3.6.0} 2001 18

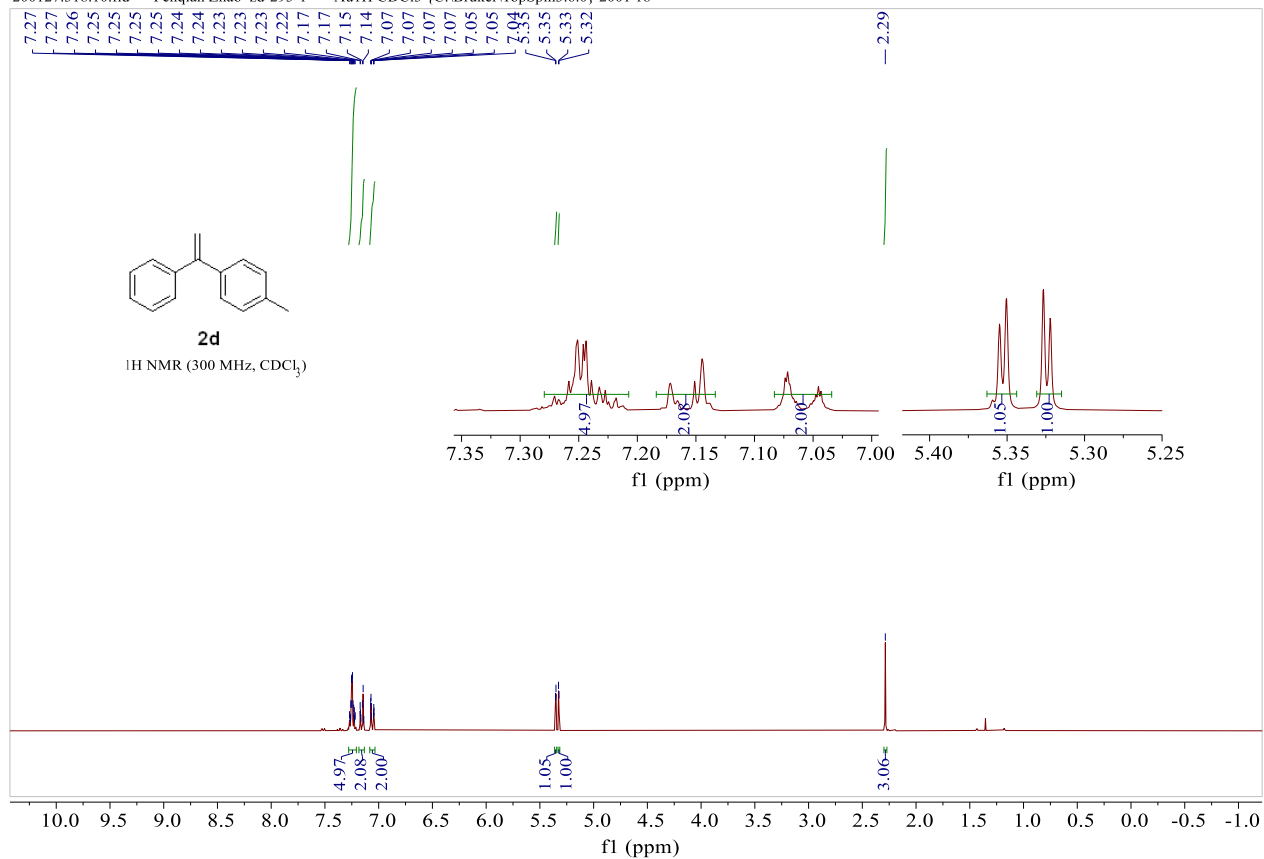

200128.f313.10.fid — Fengqian Zhao zd-293-1 — C13CPD CDCl3 {C:\Bruker\TopSpin3.6.0} 2001 13

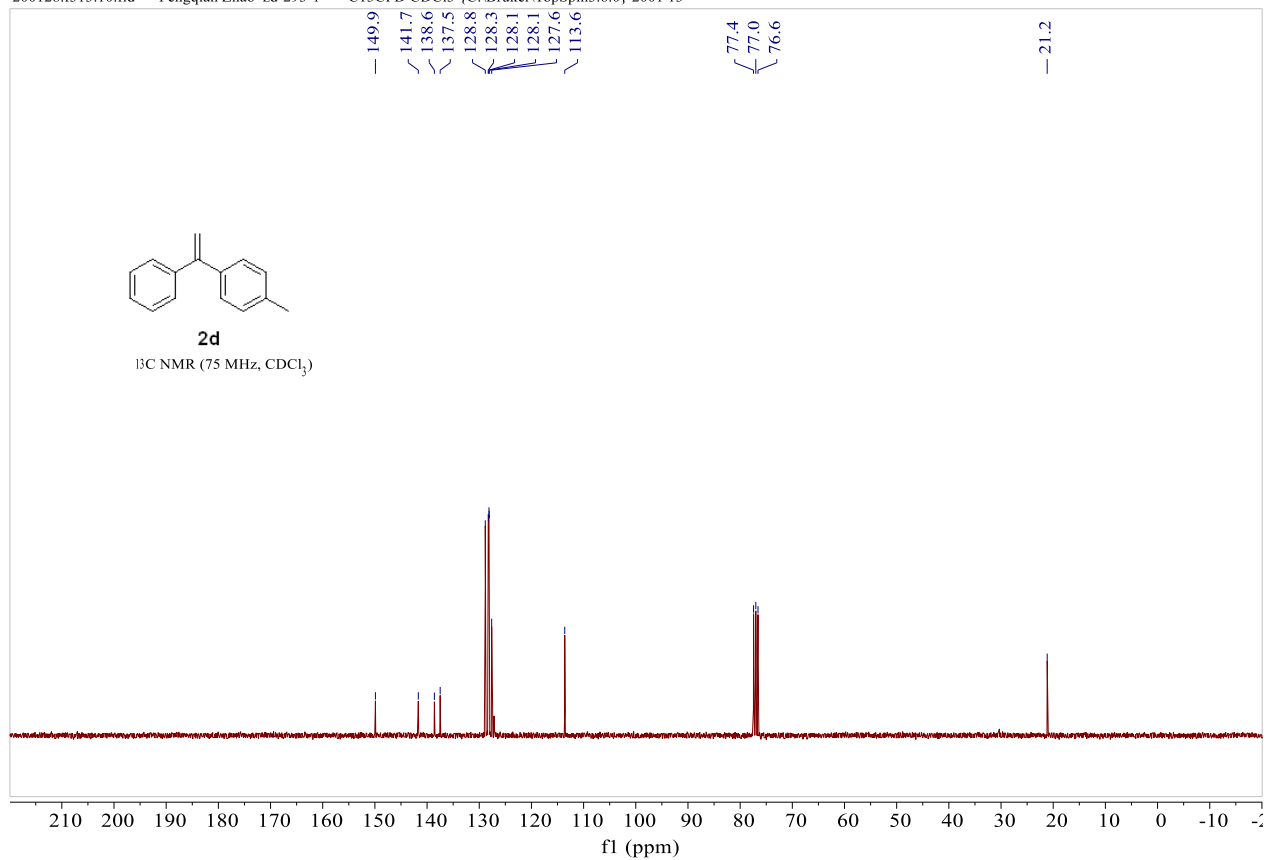

200127.319.10.fid — Fengqian Zhao zd-293-2 — Au1H CDCl3 {C:\Bruker\TopSpin3.6.0} 2001 19

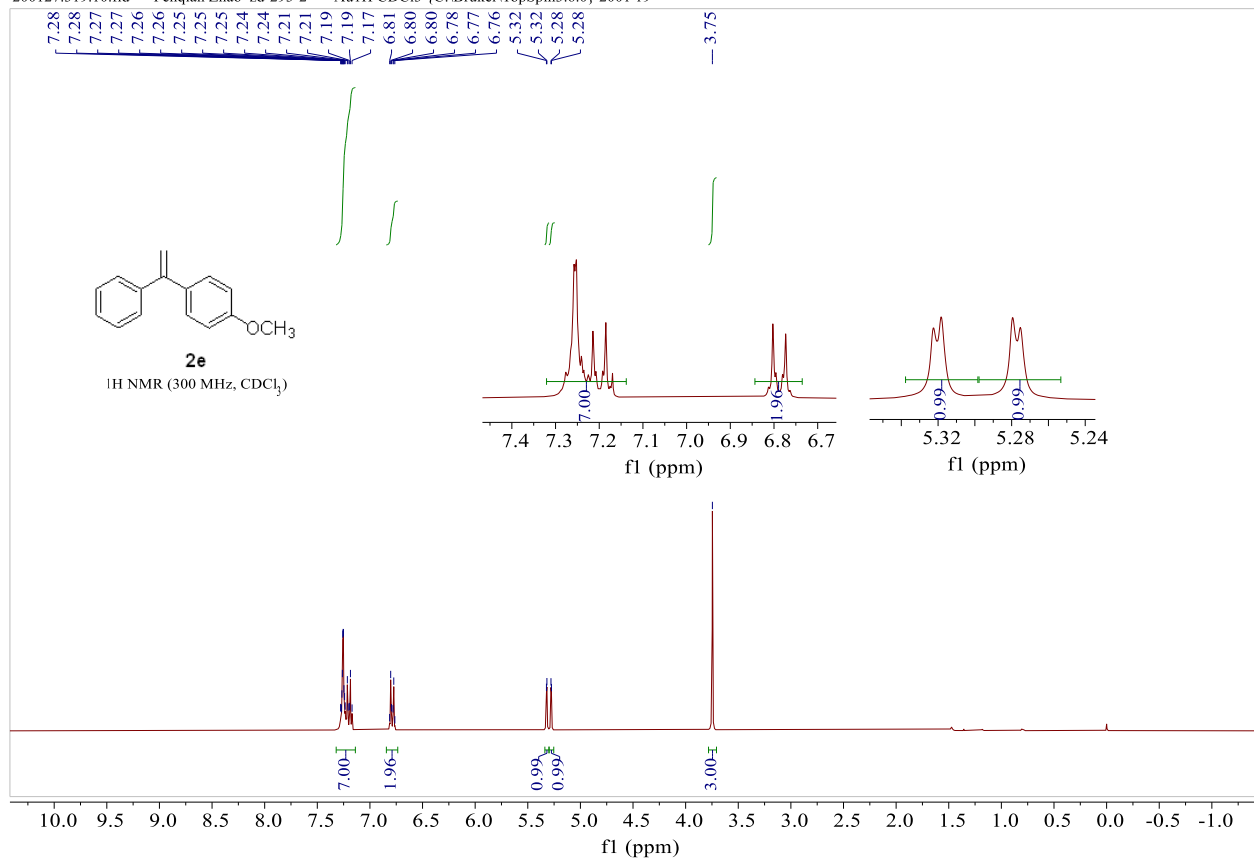

200128.f314.10.fid — Fengqian Zhao zd-293-2 — C13CPD CDCl3 {C:\Bruker\TopSpin3.6.0} 2001 14

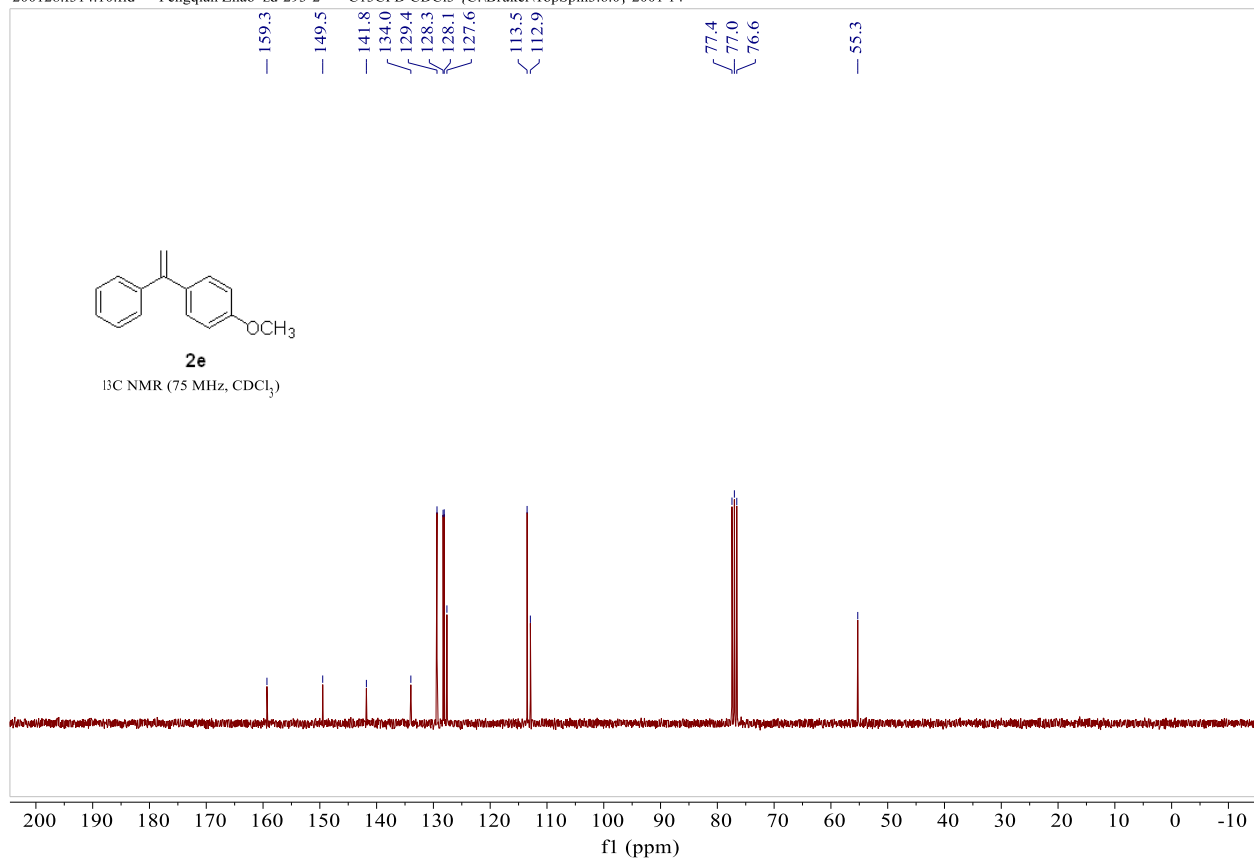

200219.314.10.fid — Fengqian Zhao zd-335-1 — Au1H CDCl3 {C:\Bruker\TopSpin3.6.0} 2002 14

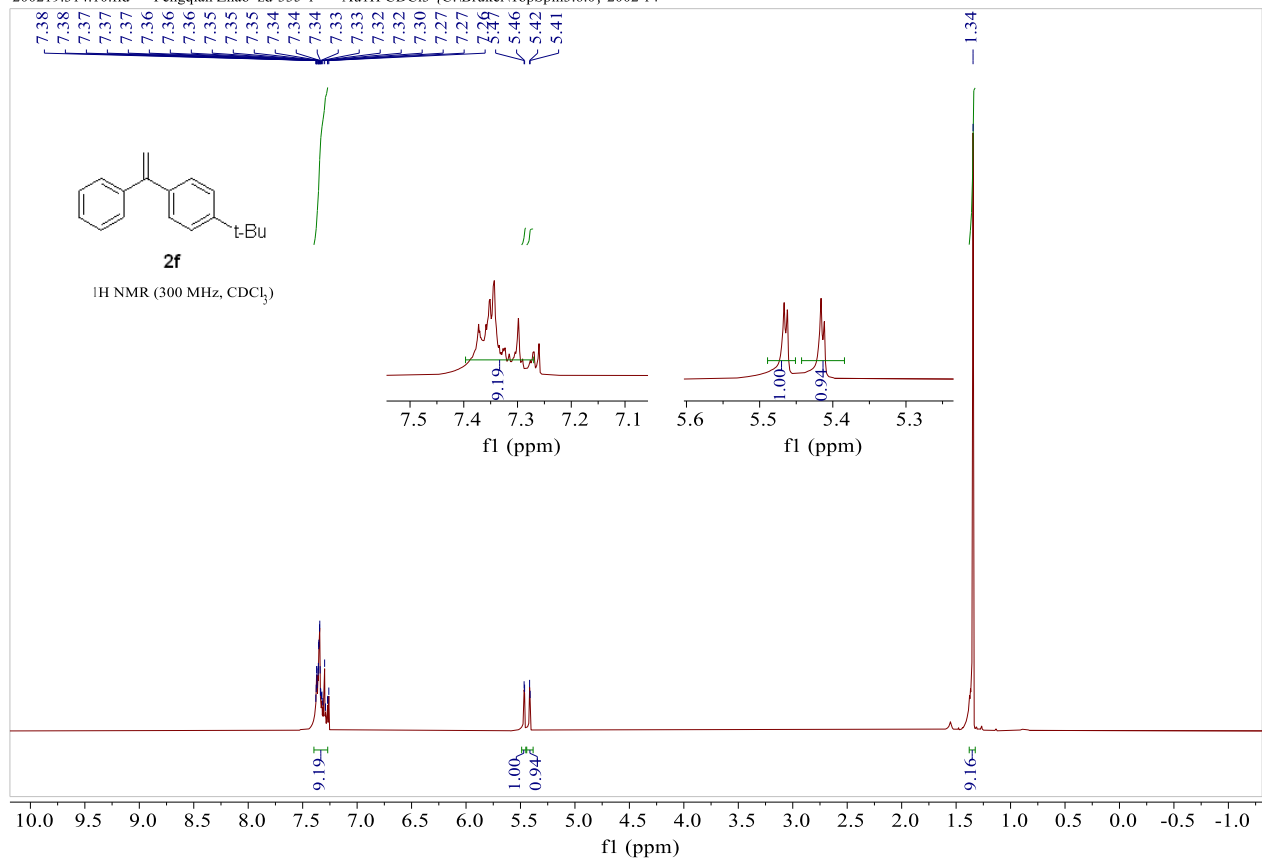

200219.314.11.fid — Fengqian Zhao zd-335-1 — Au13C CDCl3 {C:\Bruker\TopSpin3.6.0} 2002 14

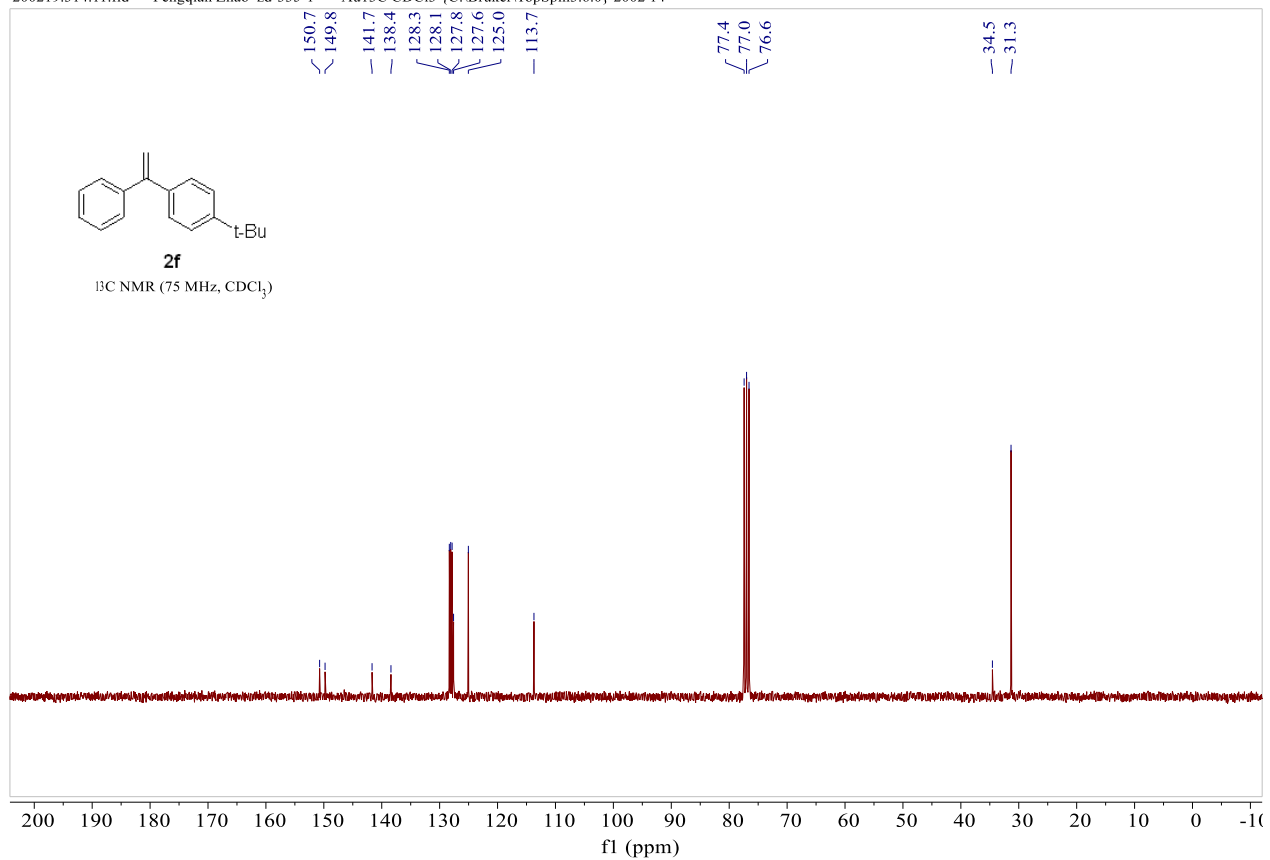

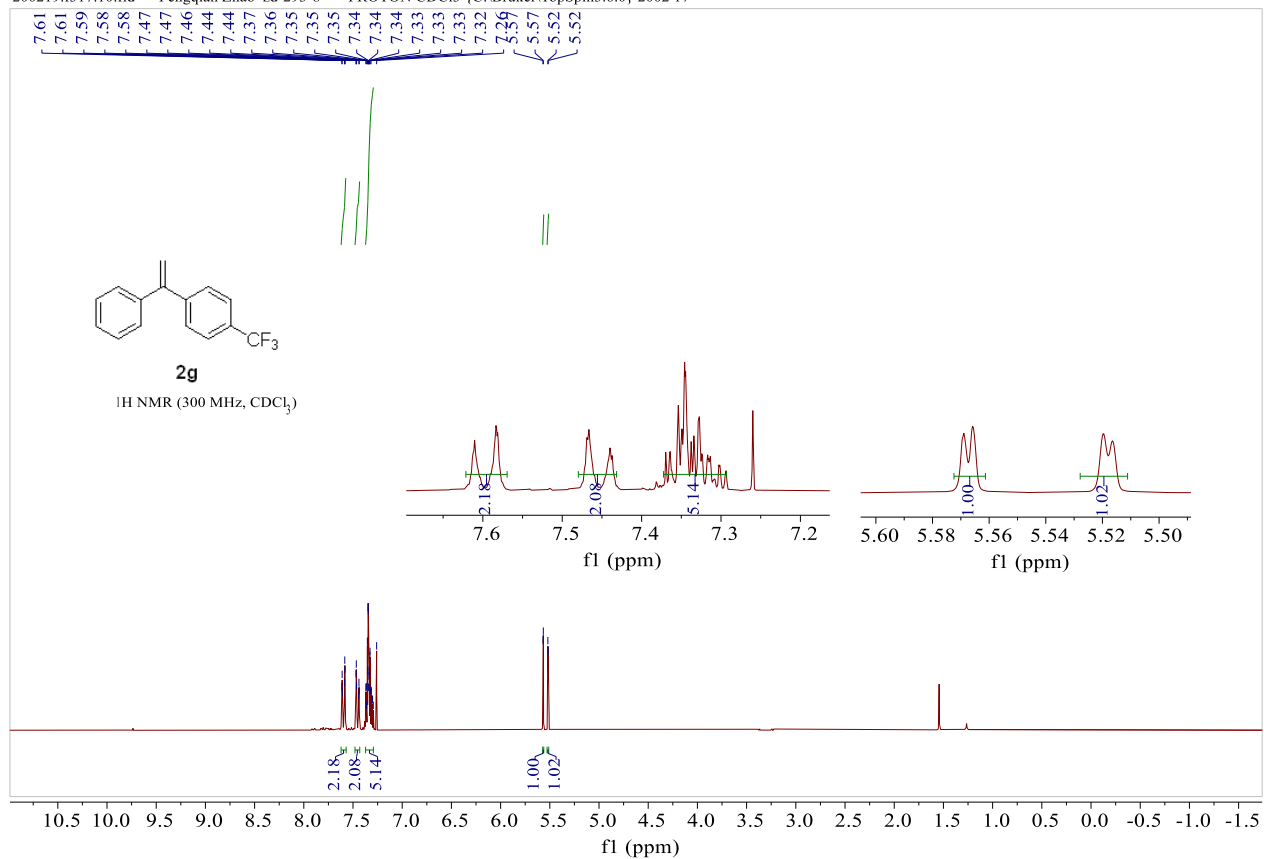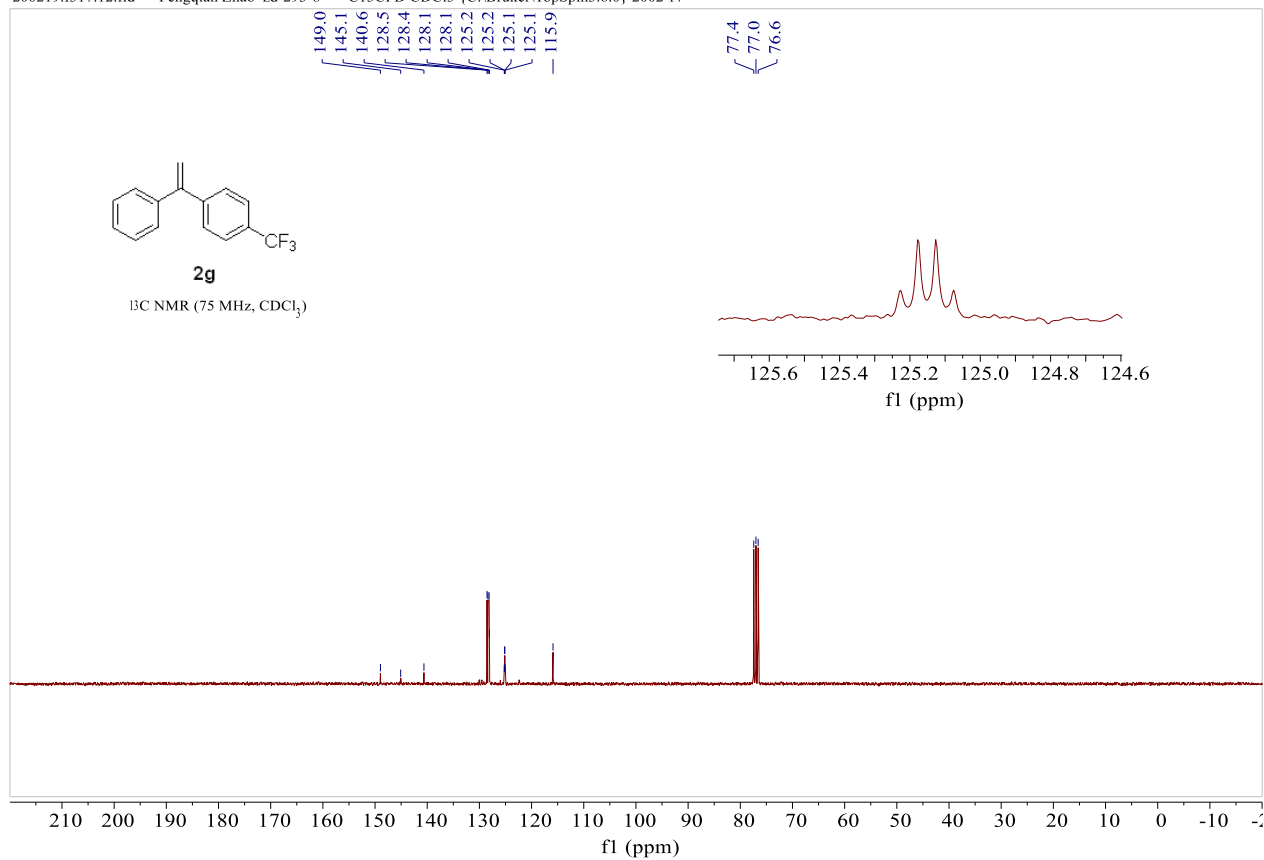

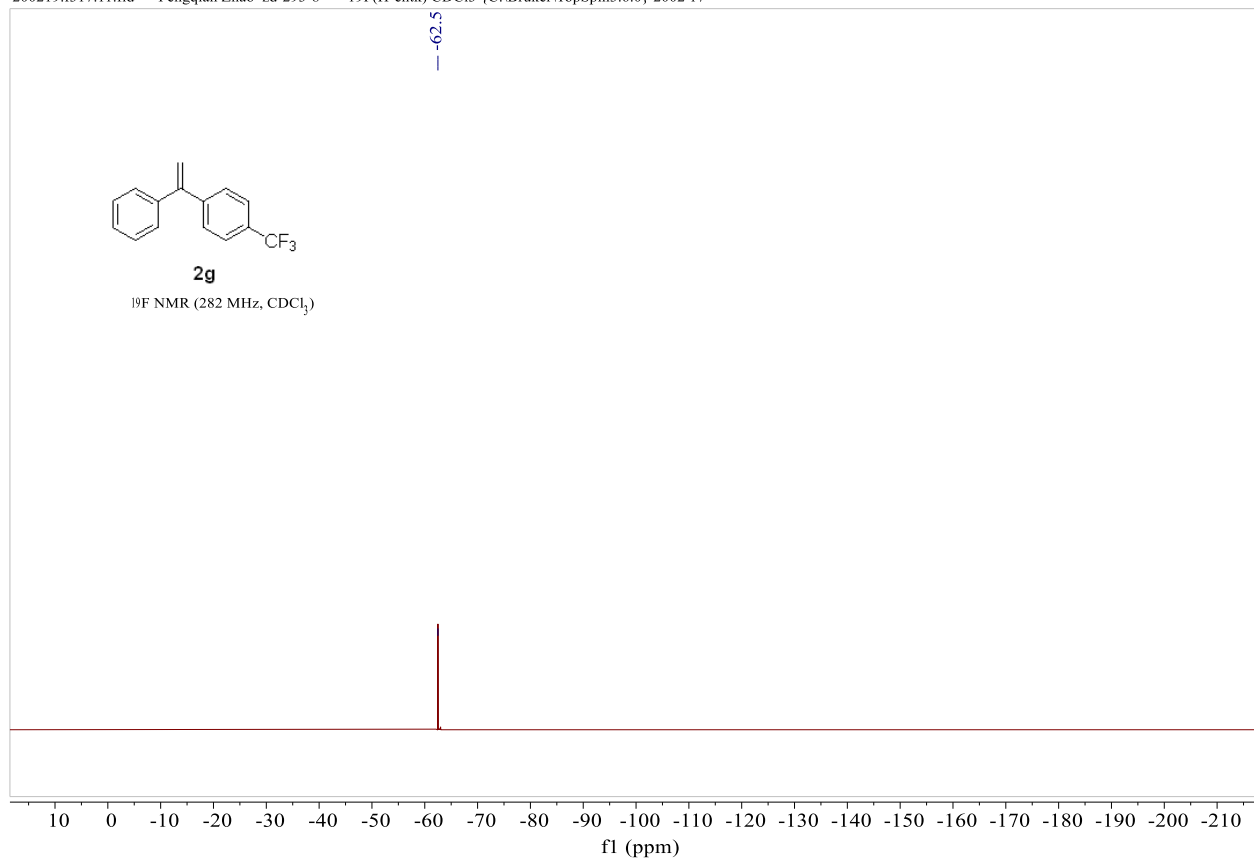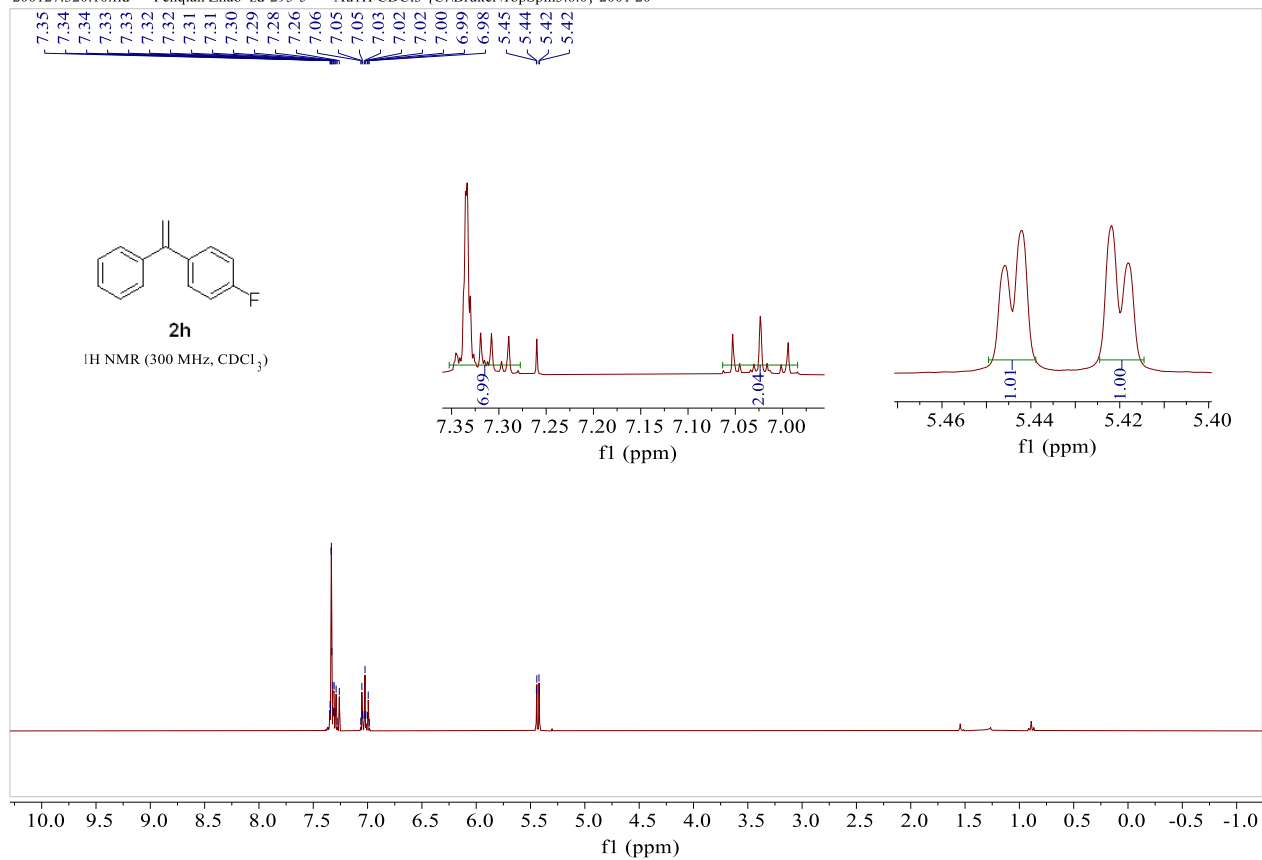



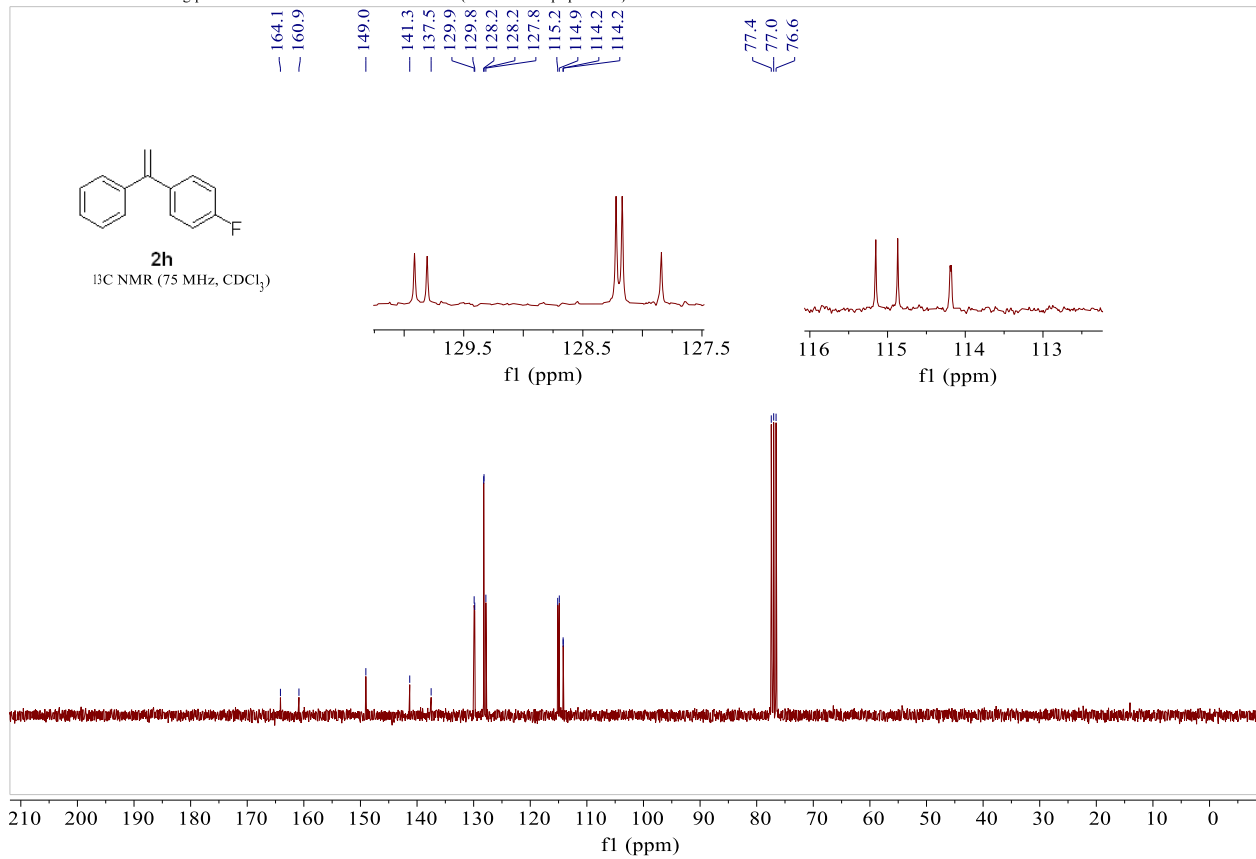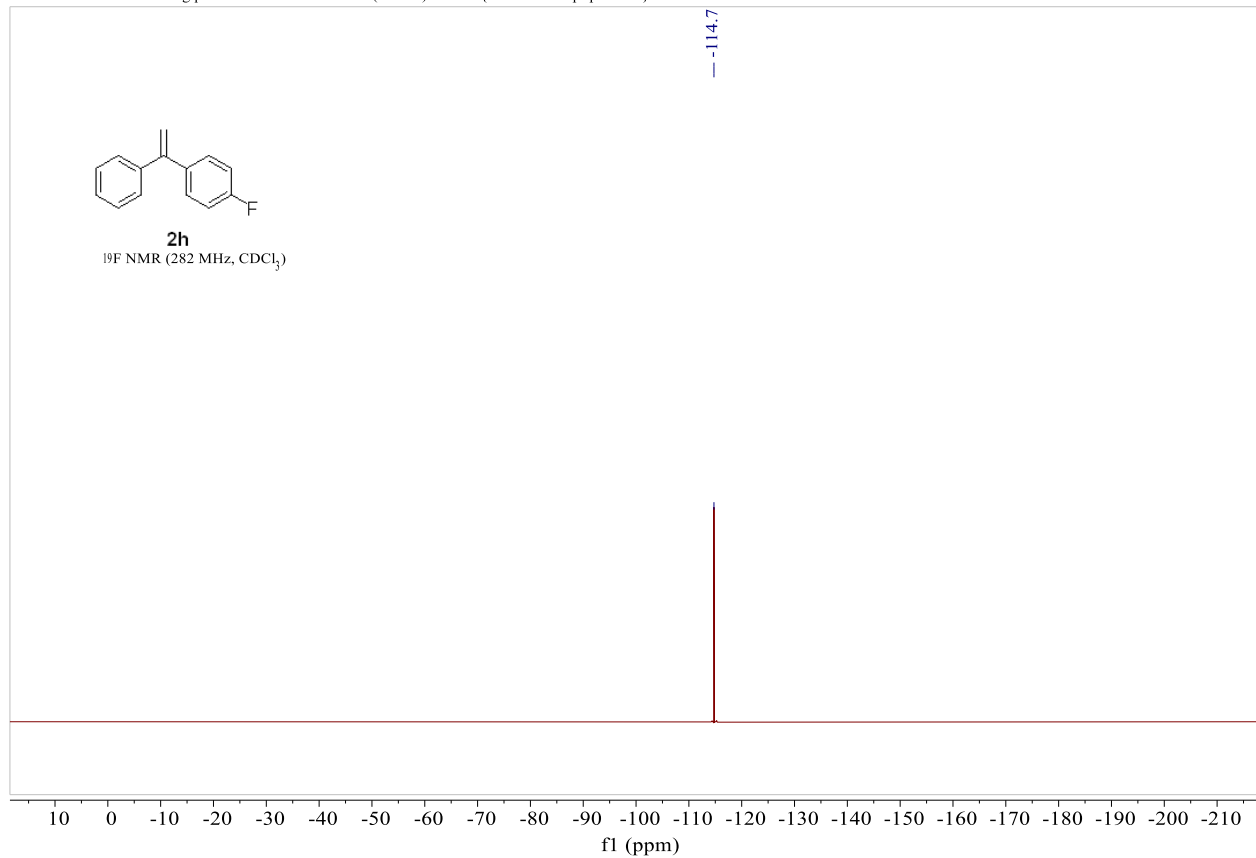

200219.315.10.fid — Fengqian Zhao zd-335-3 — Au1H CDCl3 {C:\Bruker\TopSpin3.6.0} 2002 15

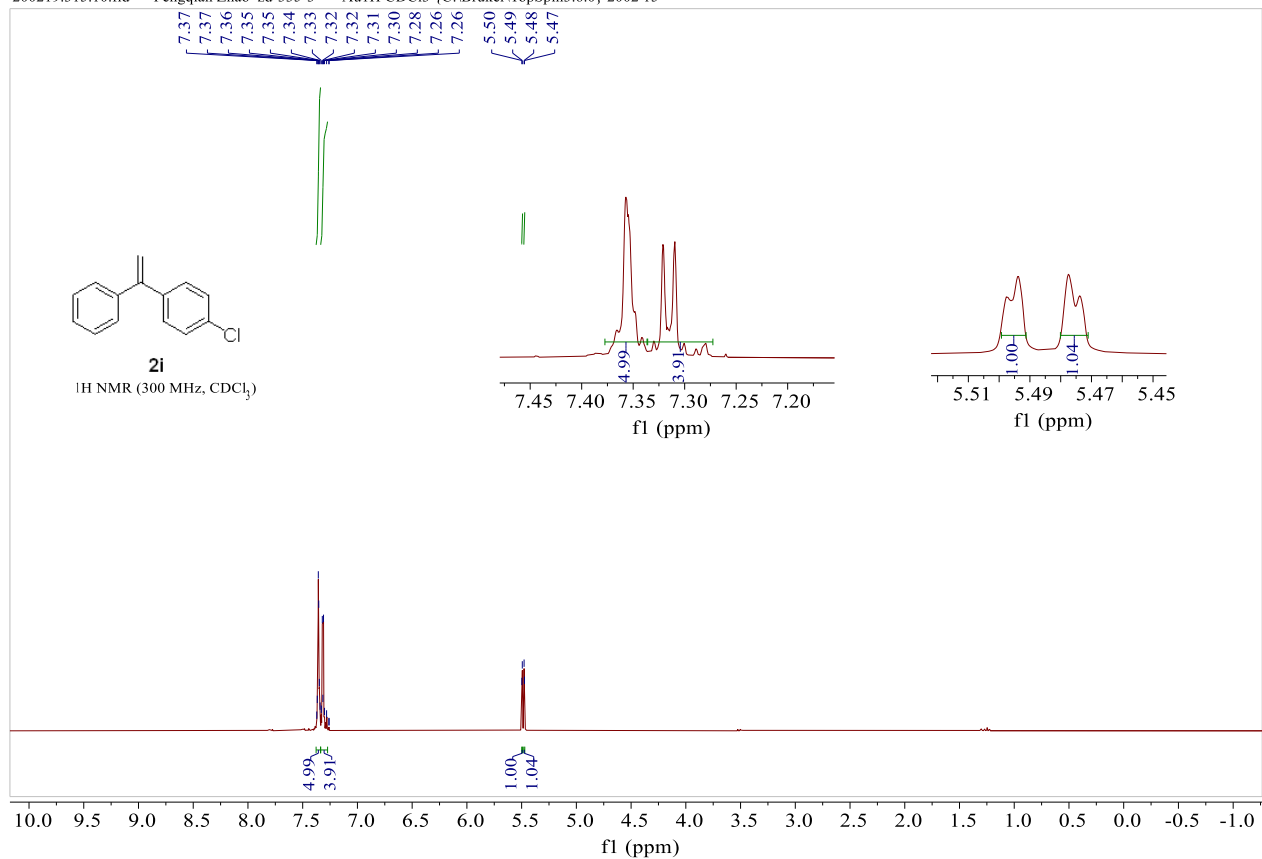

200213.404.11.fid — Fengqian Zhao zd-335-3 — Au13C CDCl3 {C:\Bruker\TopSpin3.5pl6} 2002 4

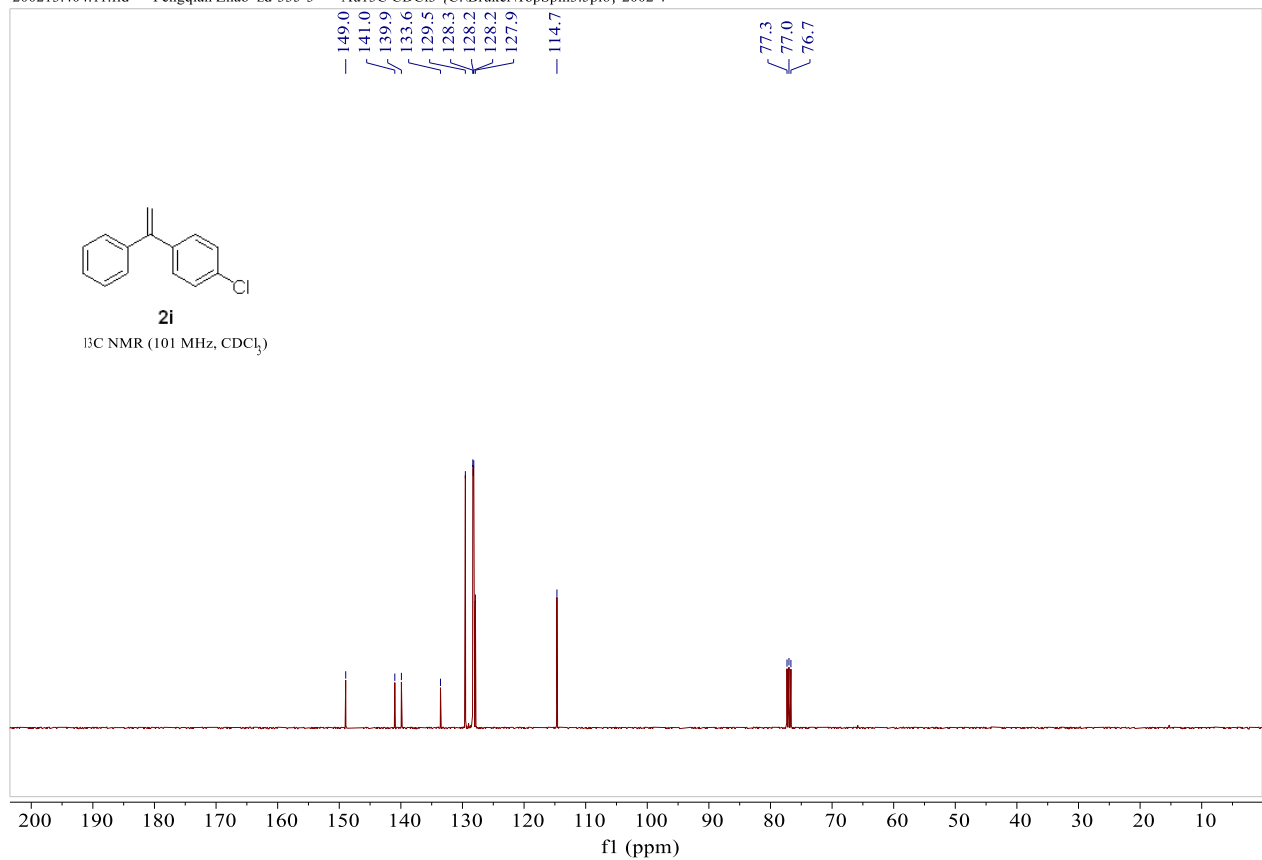

200127.321.10.fid — Fengqian Zhao zd-293-6 — Au1H CDCl3 {C:\Bruker\TopSpin3.6.0} 2001 21

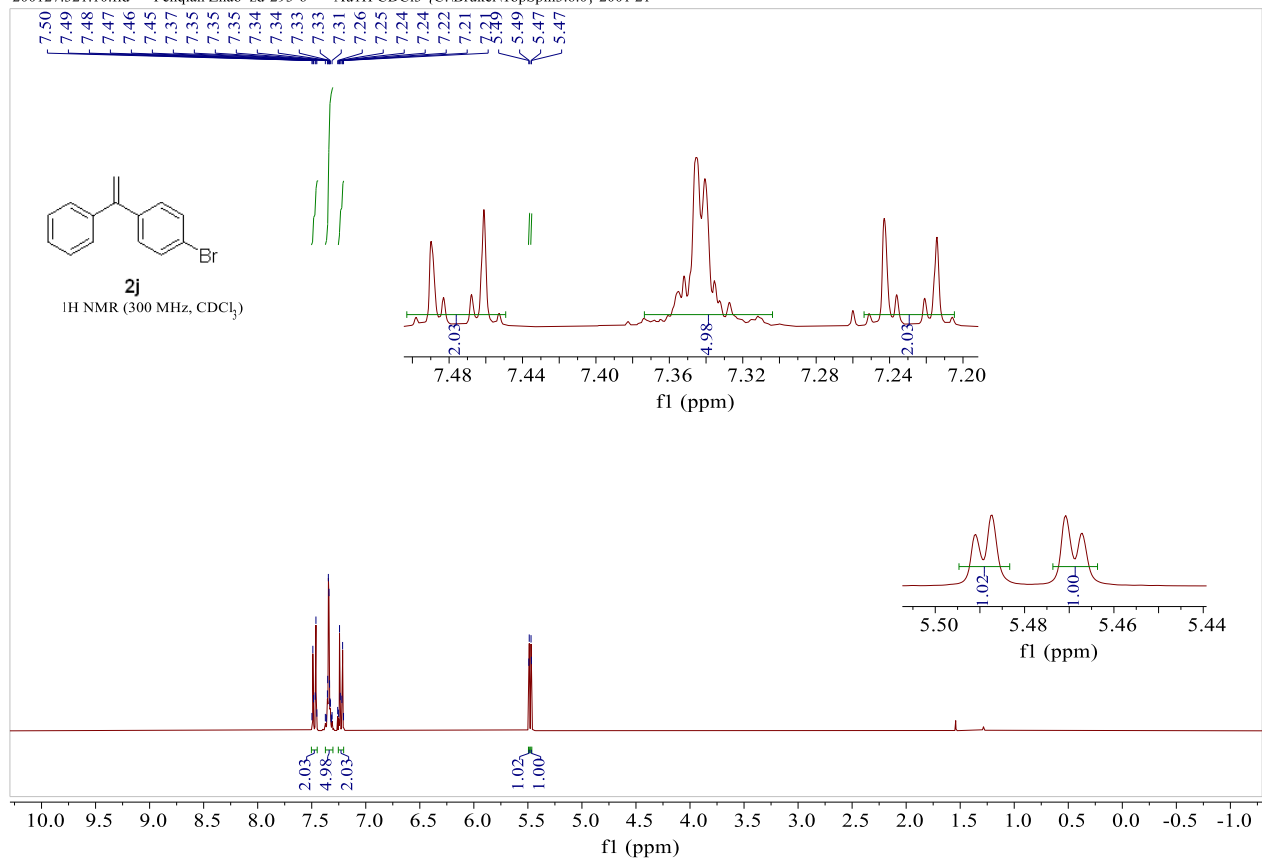

200128.f316.10.fid — Fengqian Zhao zd-293-6 — C13CPD CDCl3 {C:\Bruker\TopSpin3.6.0} 2001 16

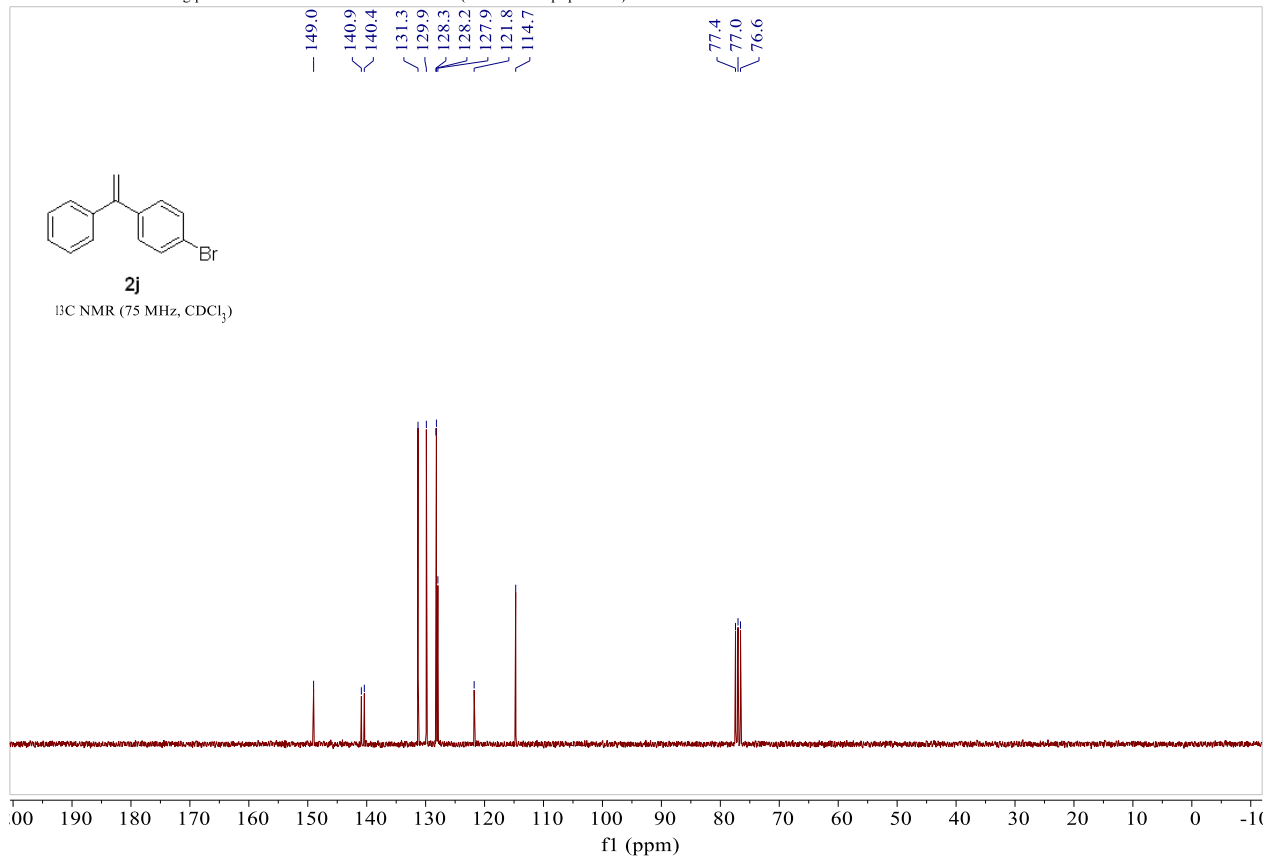

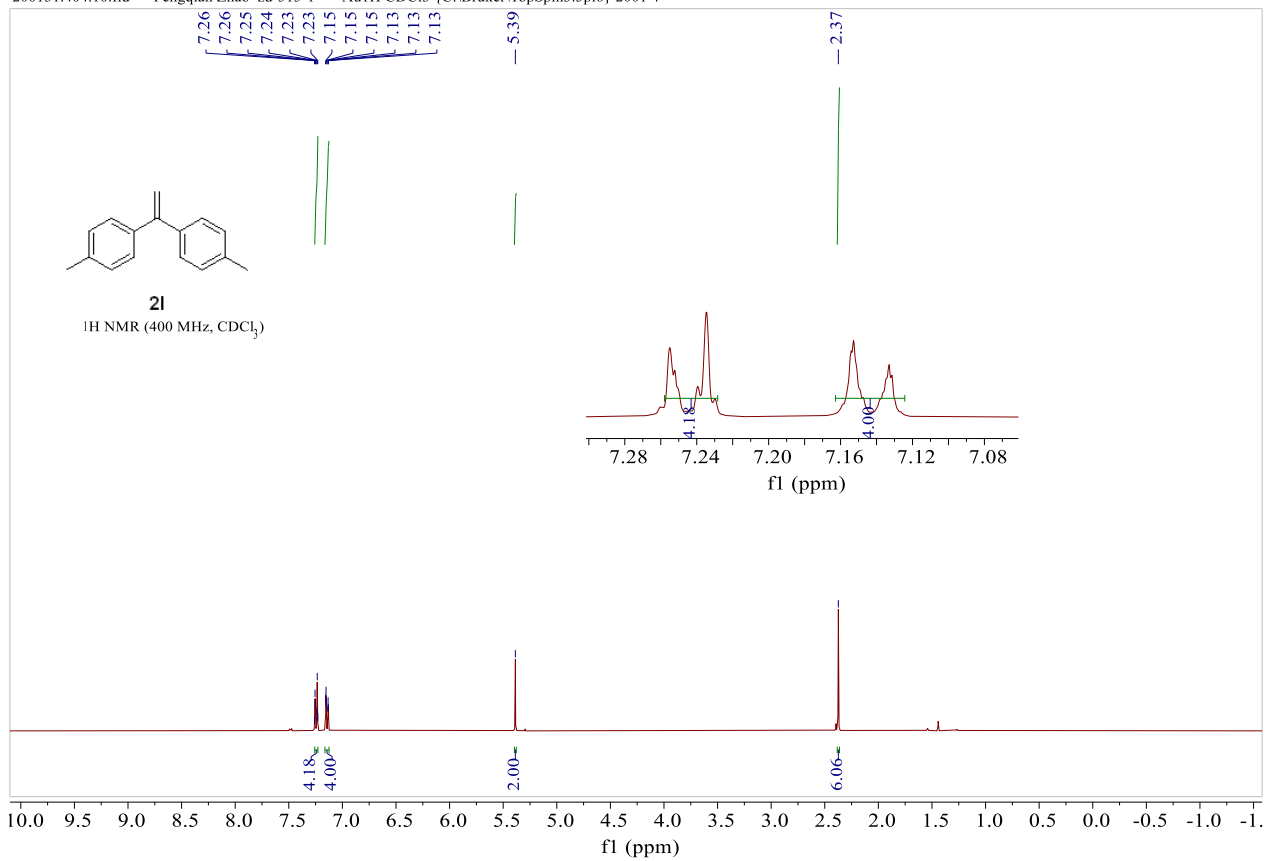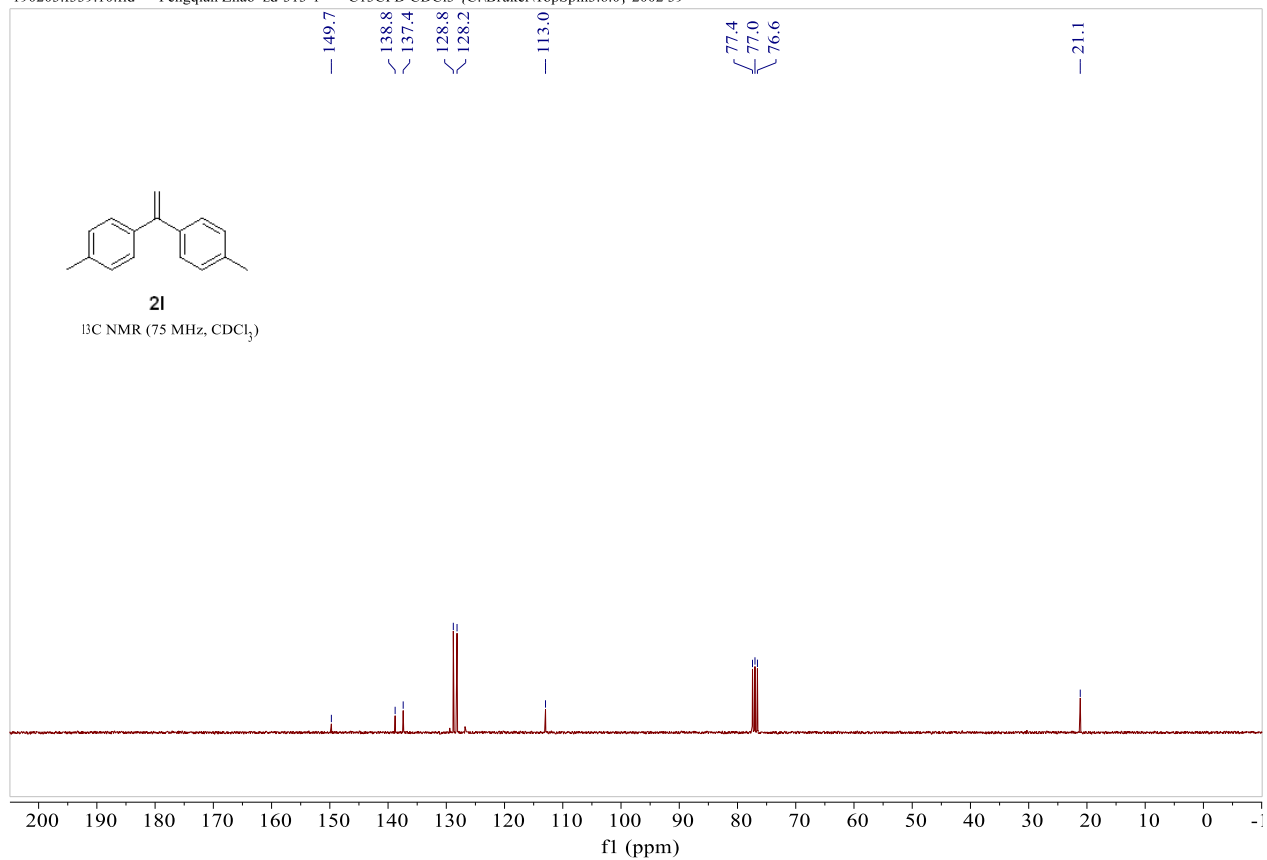

200131.405.10.fid — Fengqian Zhao zd-313-2 — Au1H CDCl3 {C:\Bruker\TopSpin3.5pl6} 2001 5

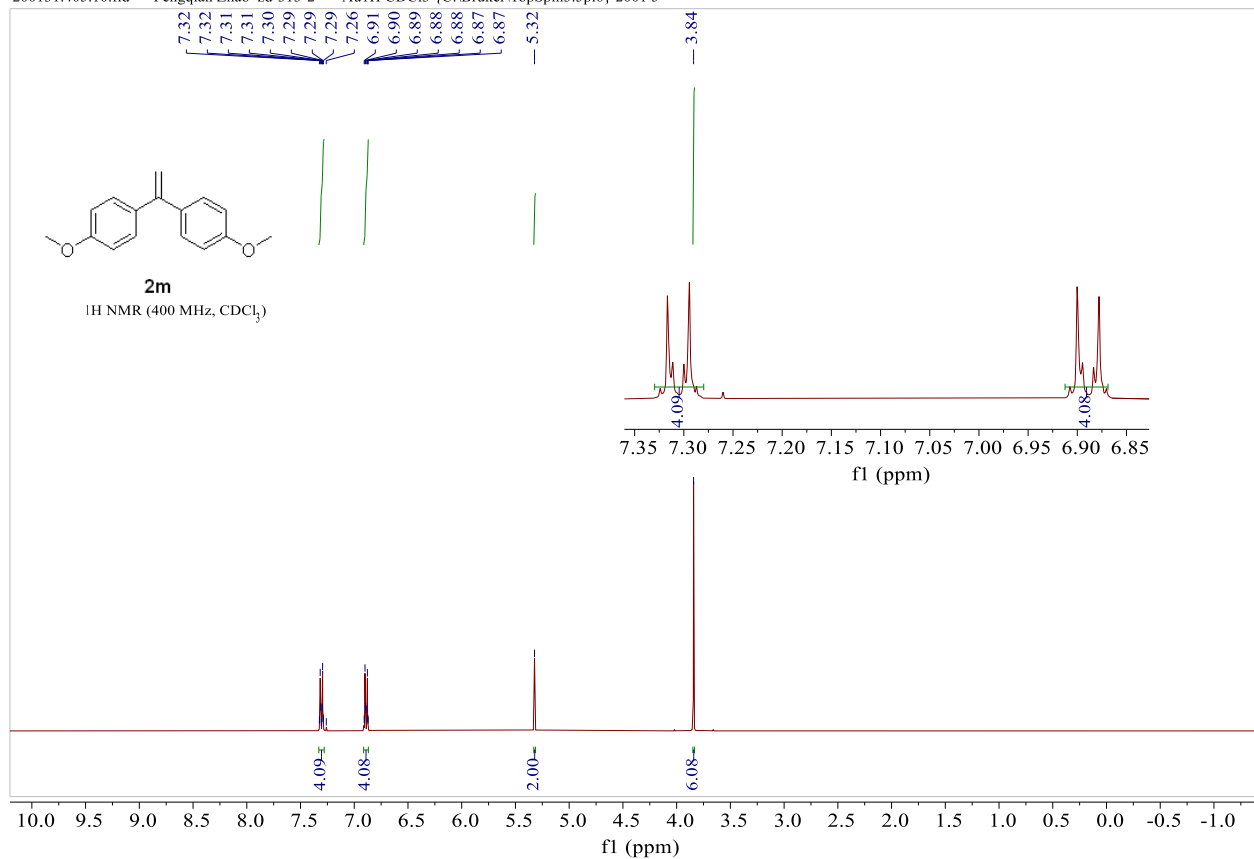

190203.f338.10.fid — Fengqian Zhao zd-313-2 — C13CPD CDCl3 {C:\Bruker\TopSpin3.6.0} 2002 38

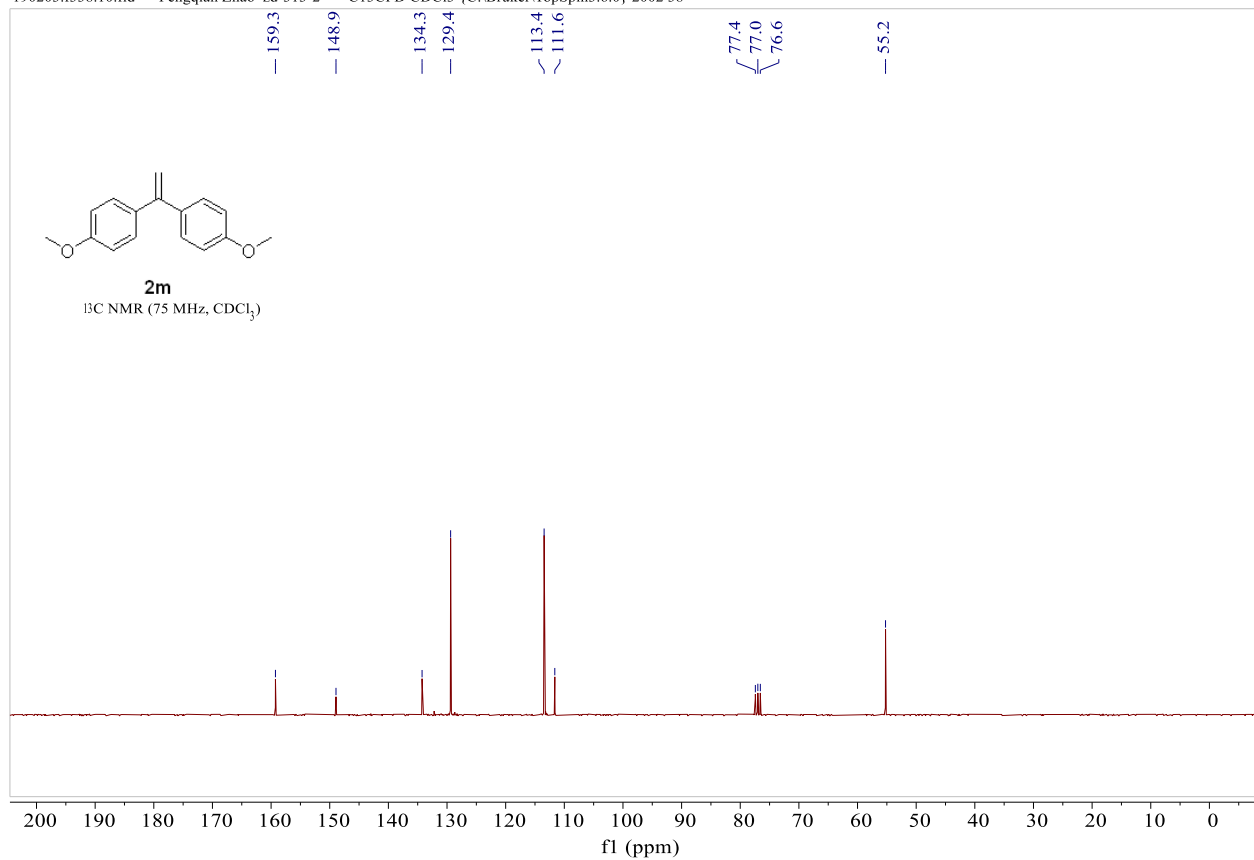

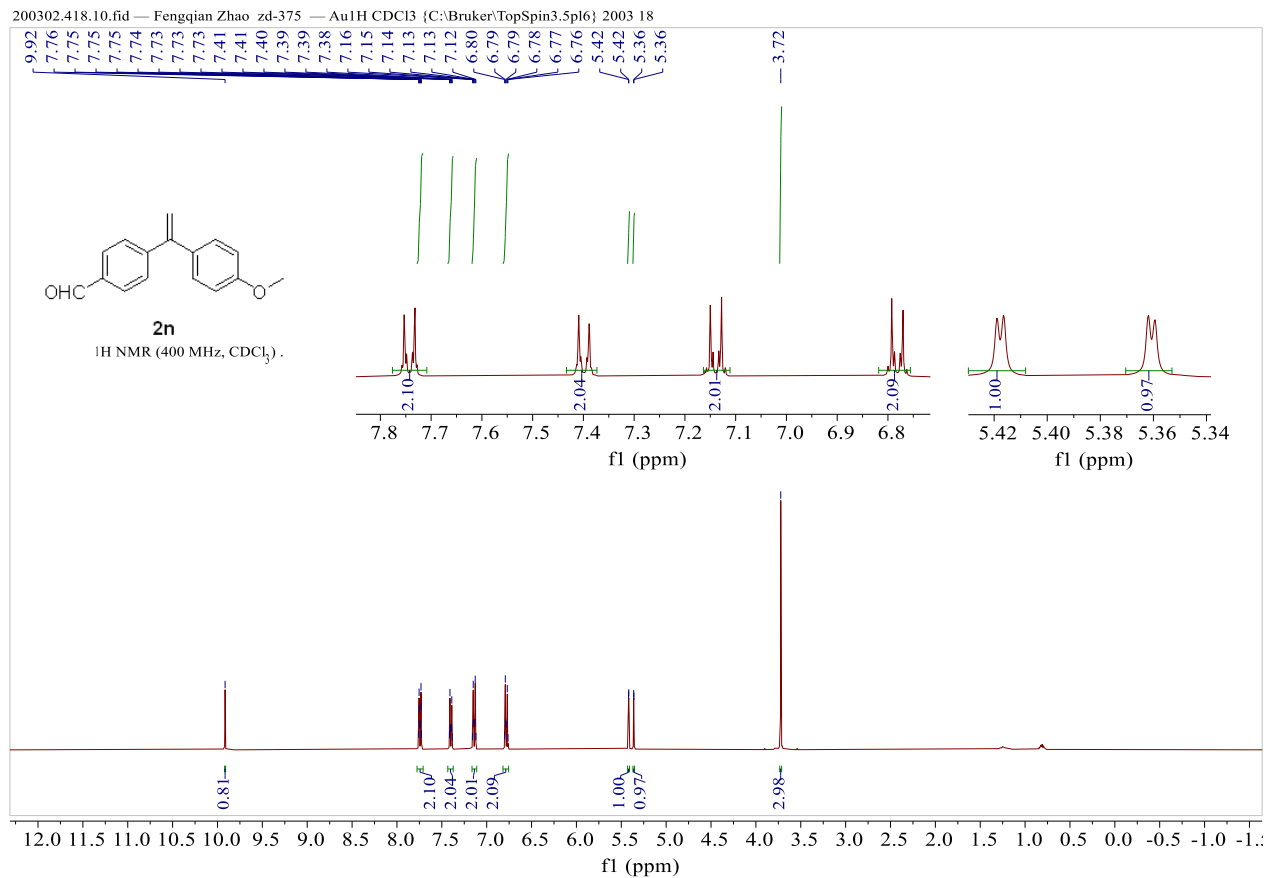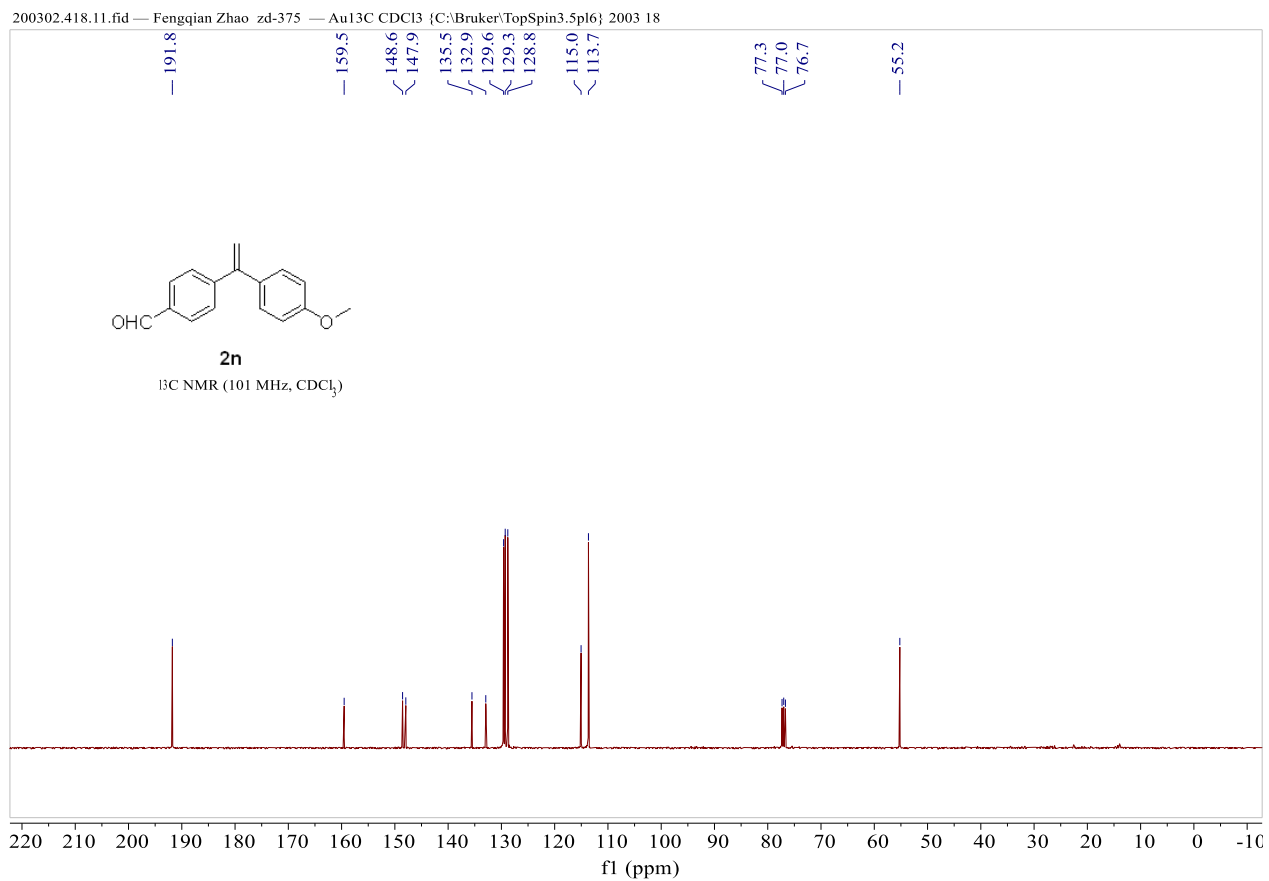

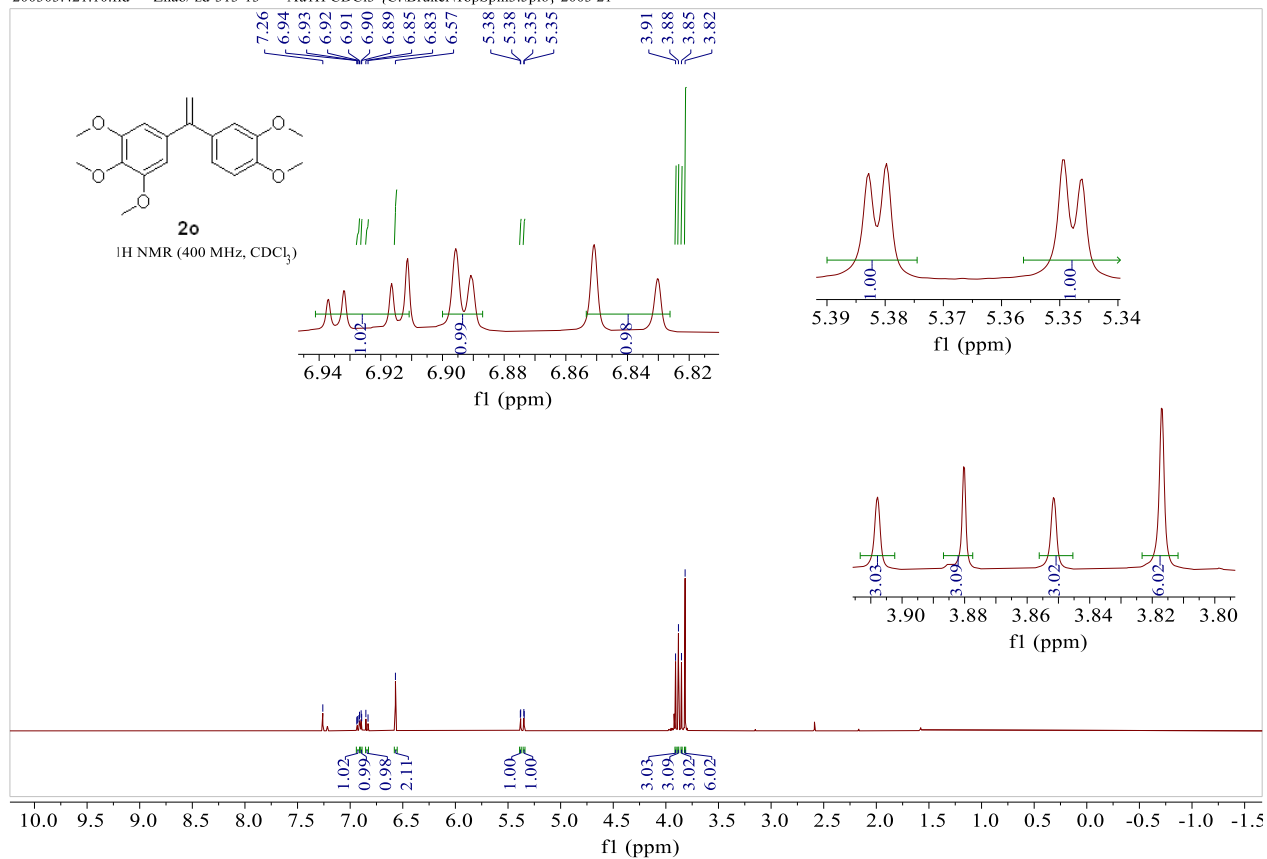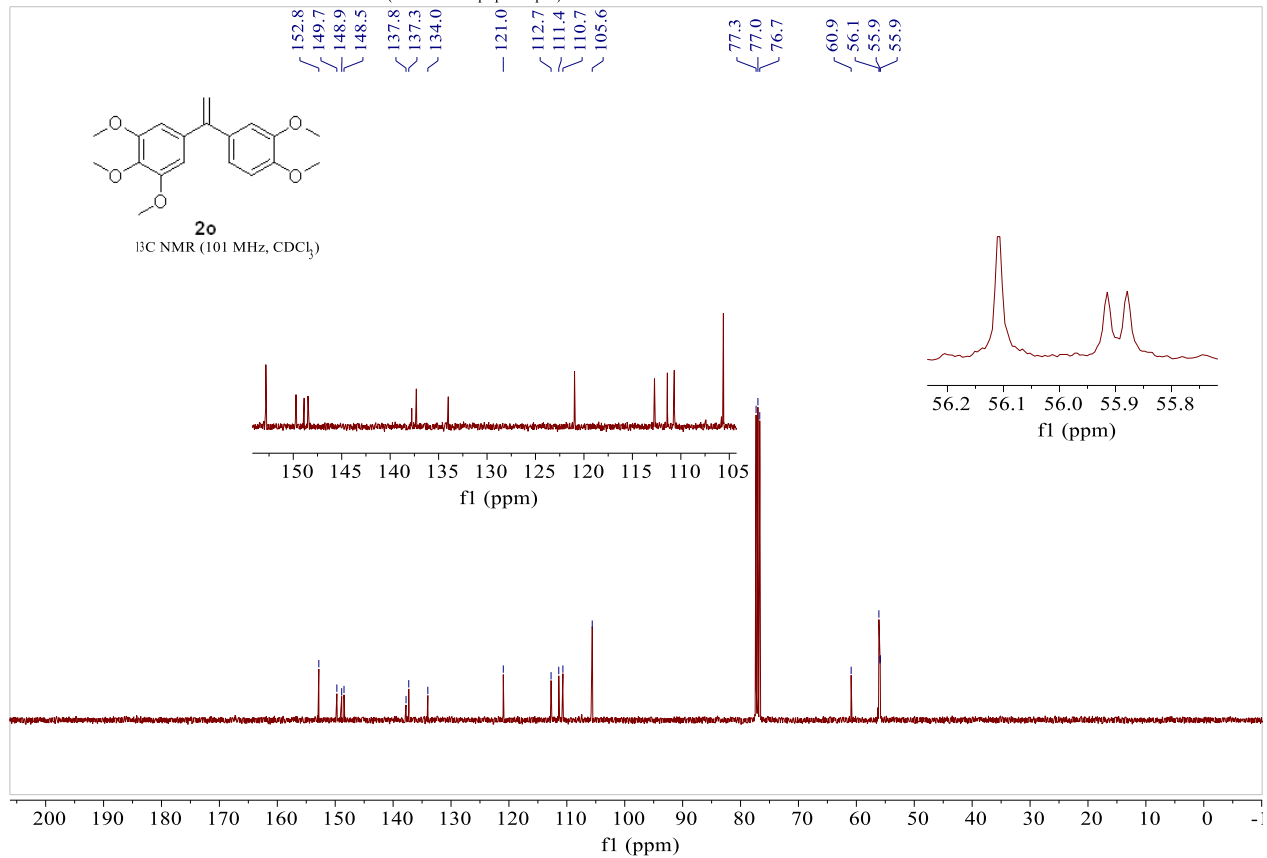

200408.f308.10.fid — Fengqian Zhao zd-313-7 — PROTON CDC13 {C:\Bruker\TopSpin3.6.0} 2004 8

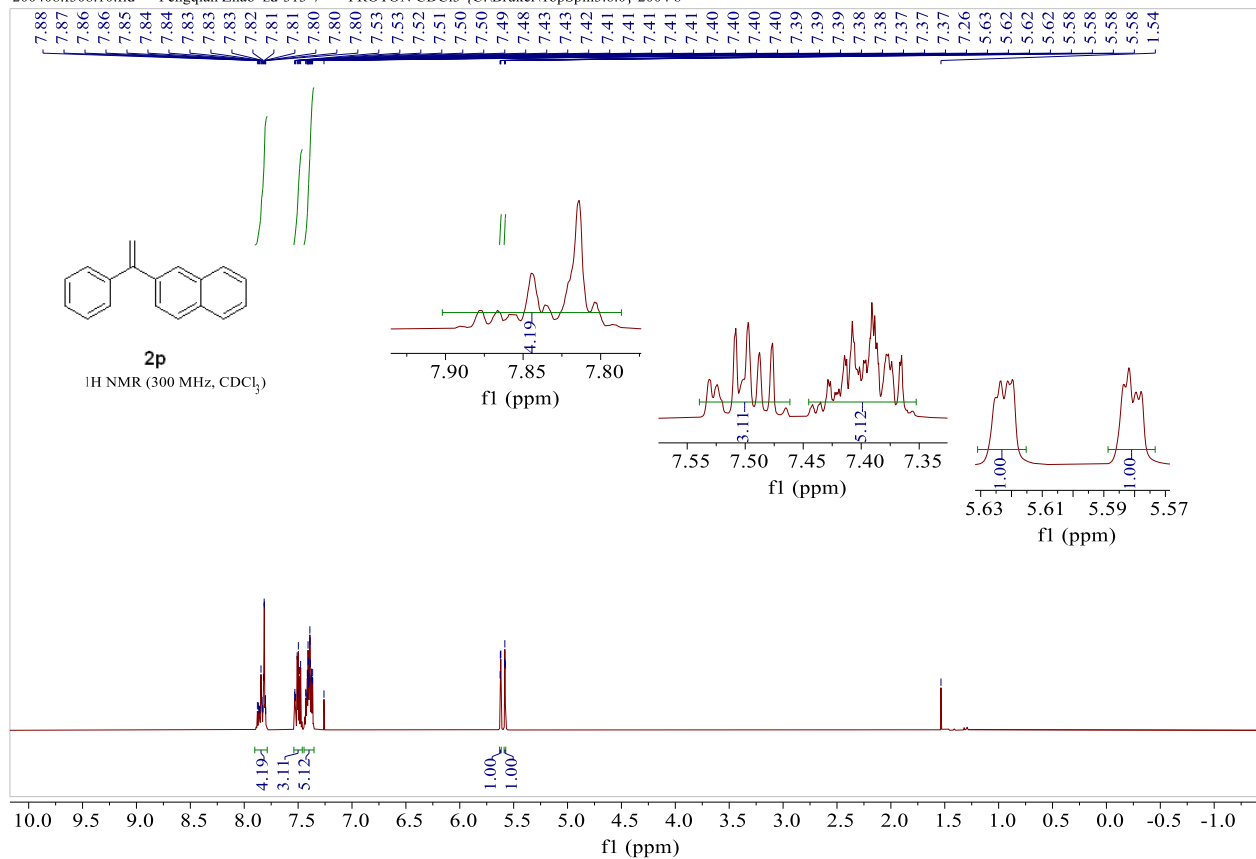

200408.f308.11.fid — Fengqian Zhao zd-313-7 — C13CPD CDC13 {C:\Bruker\TopSpin3.6.0} 2004 8

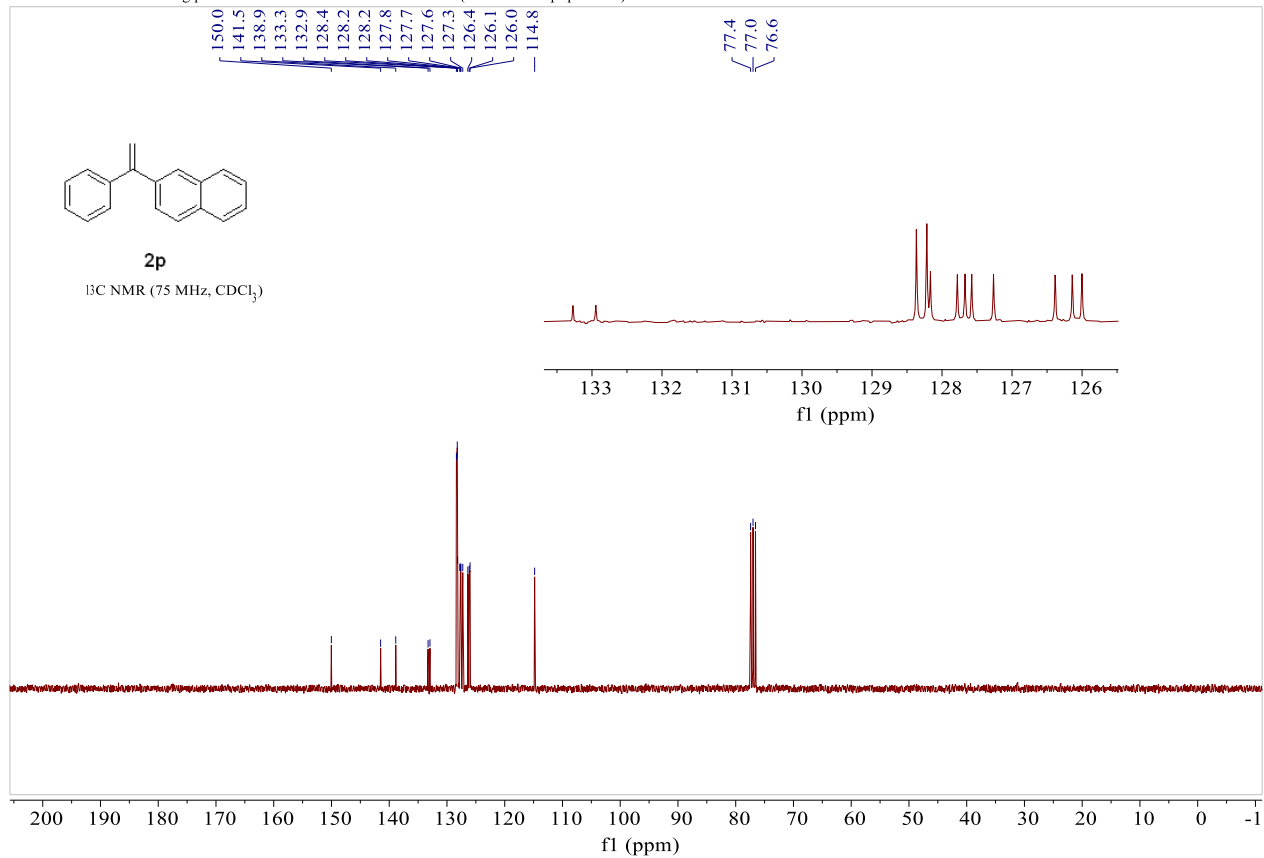



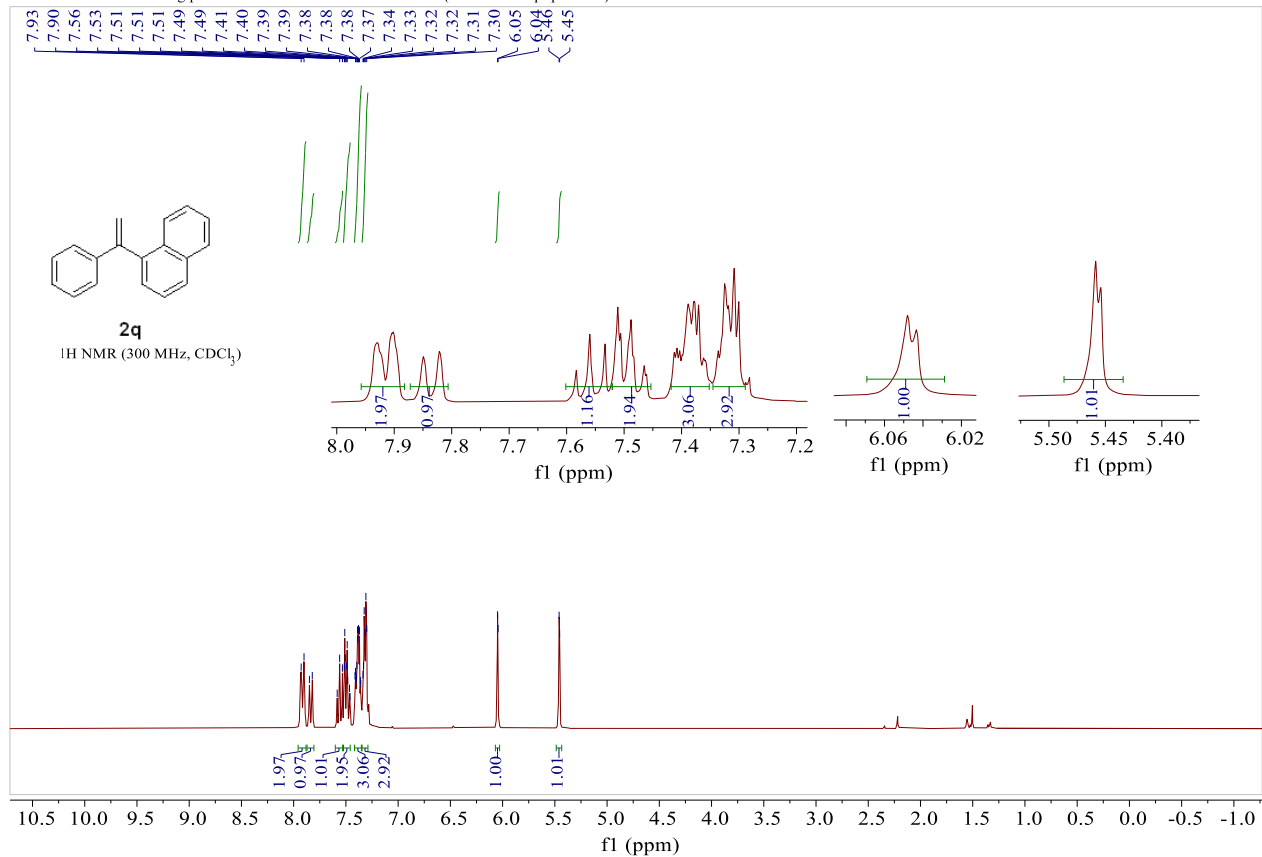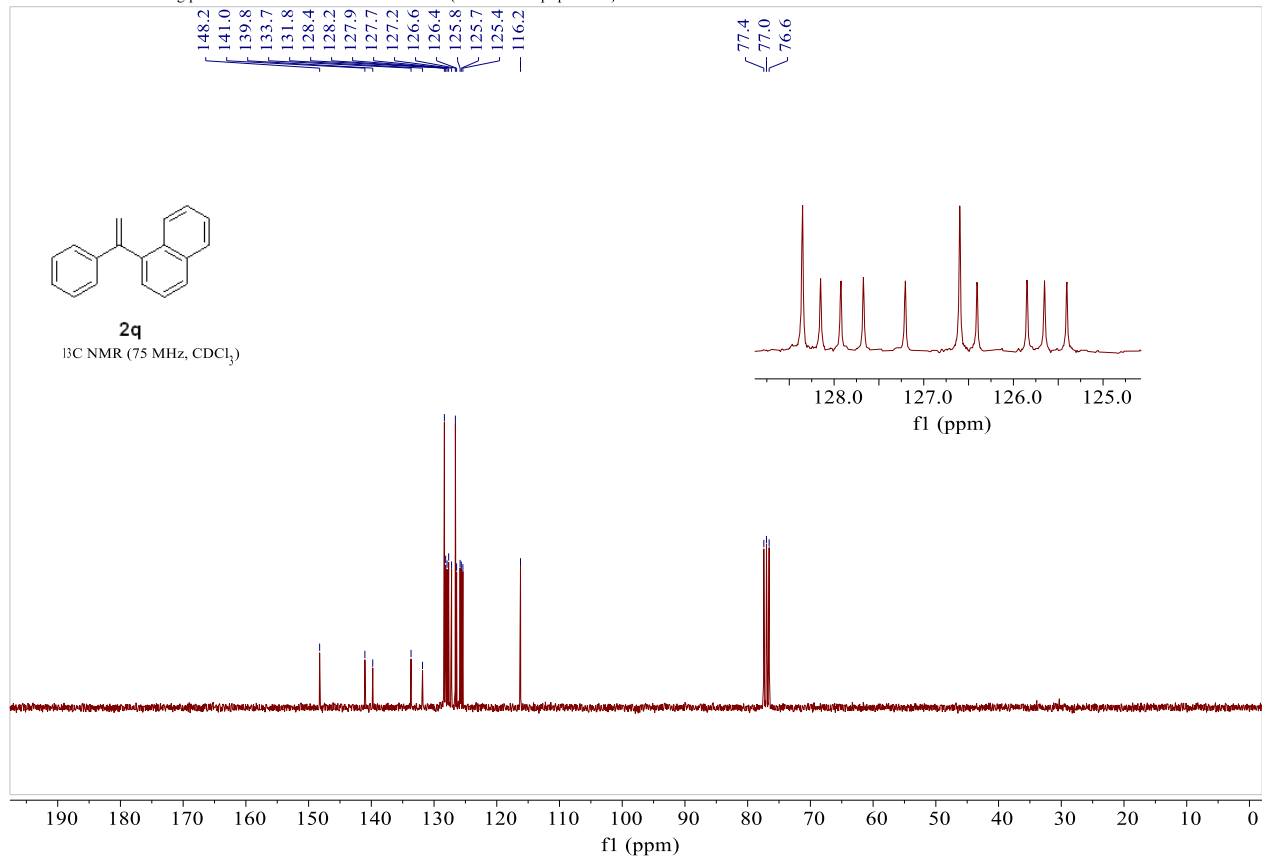

200303.422.10.fid — Zhao/ zd-313-4 — Au1H CDCl3 {C:\Bruker\TopSpin3.5pl6} 2003 22

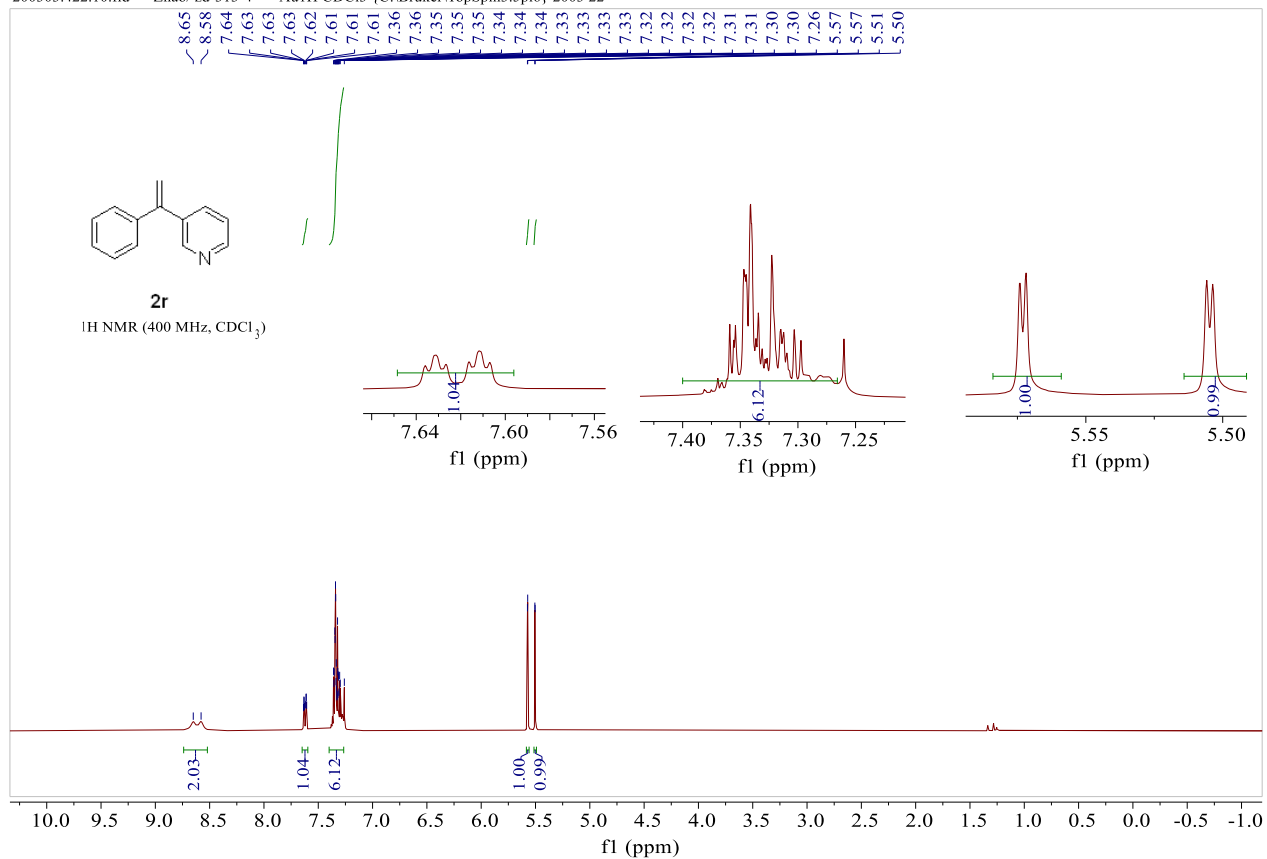

200303.422.11.fid — Zhao/ zd-313-4 — Au13C CDCl3 {C:\Bruker\TopSpin3.5pl6} 2003 22

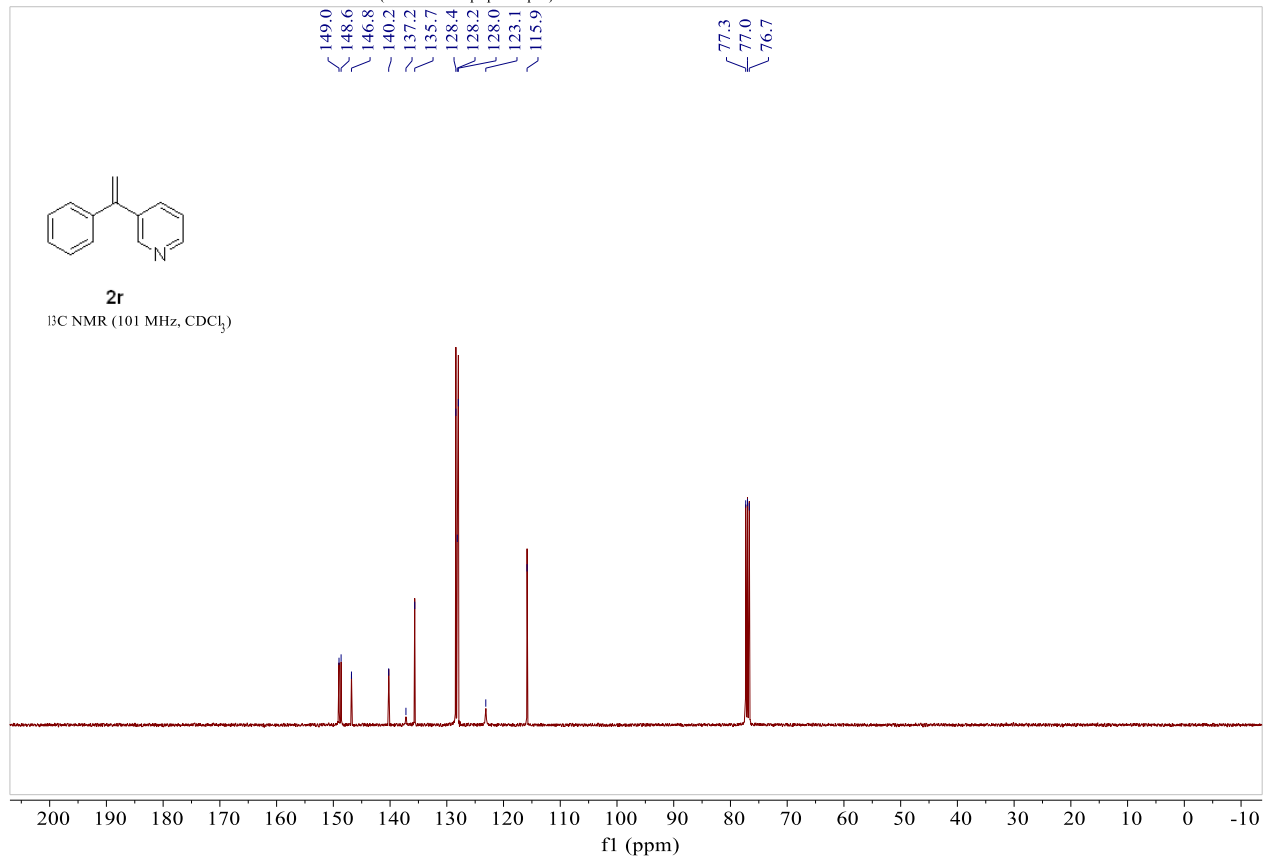

200221.f311.10.fid — Fengqian Zhao zd-335-5 — PROTON CDCl<sub>3</sub> {C:\Bruker\TopSpin3.6.0} 2002 11

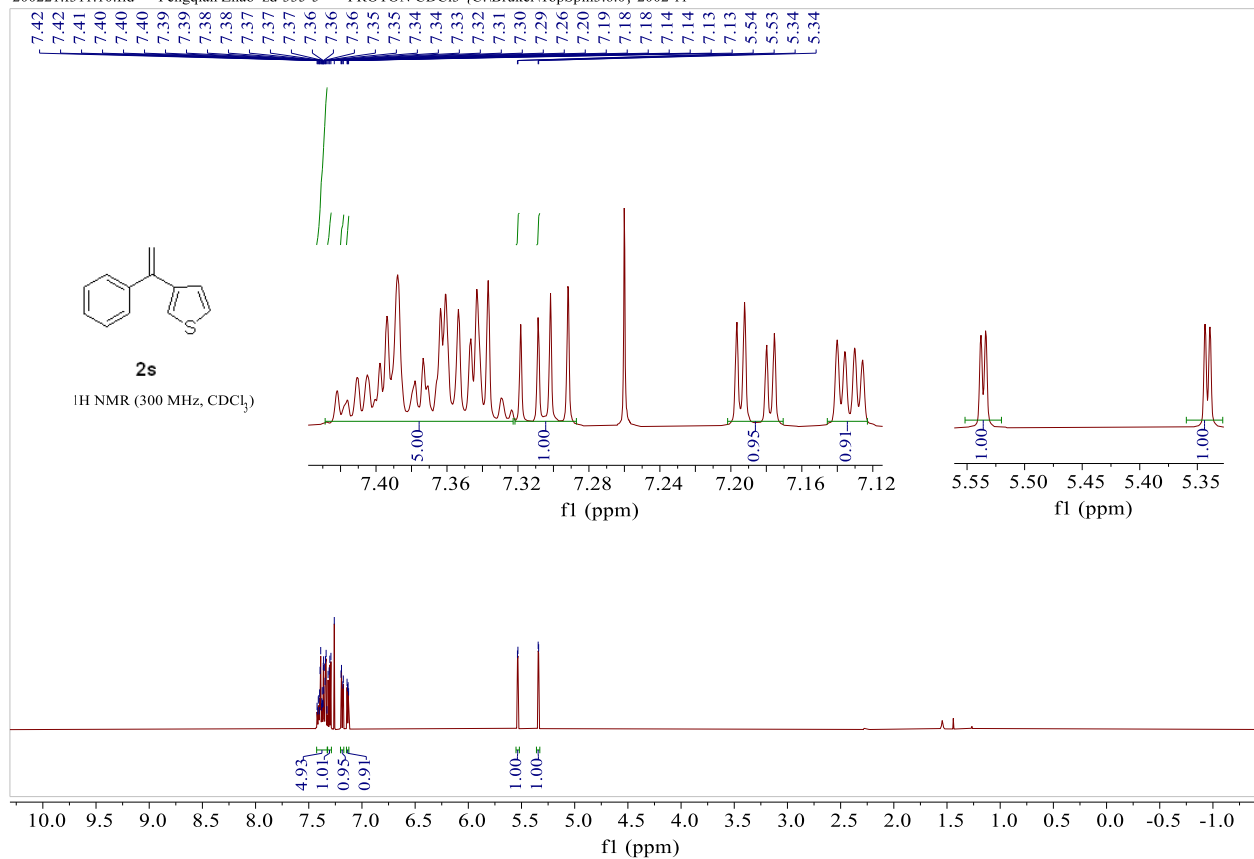

200302.420.11.fid — Fengqian Zhao zd-335-5 — Au13C CDCl<sub>3</sub> {C:\Bruker\TopSpin3.5p16} 2003 20

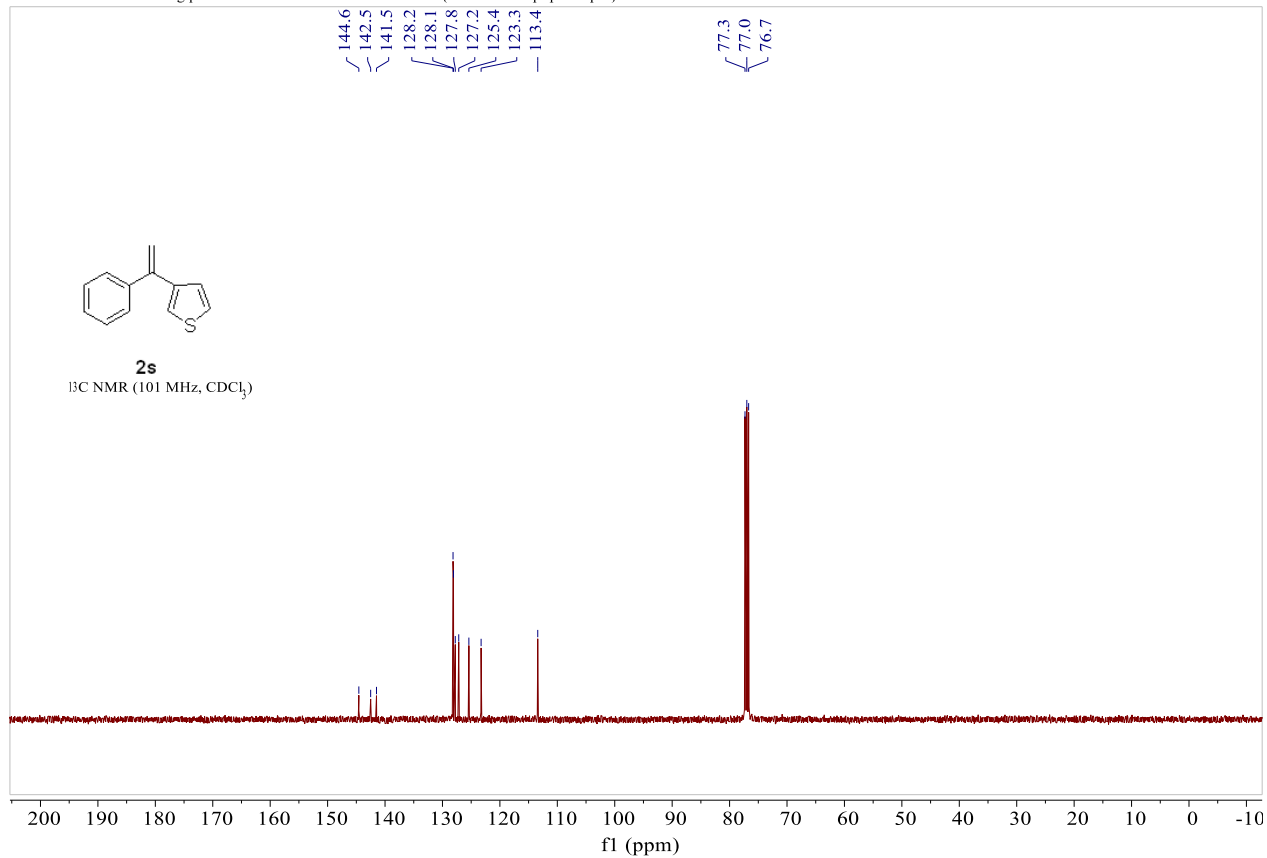

200217.314.10.fid — Fengqian Zhao zd-334-1-2 — Au1H CDCl3 (C:\Bruker\TopSpin3.6.0) 2002 14

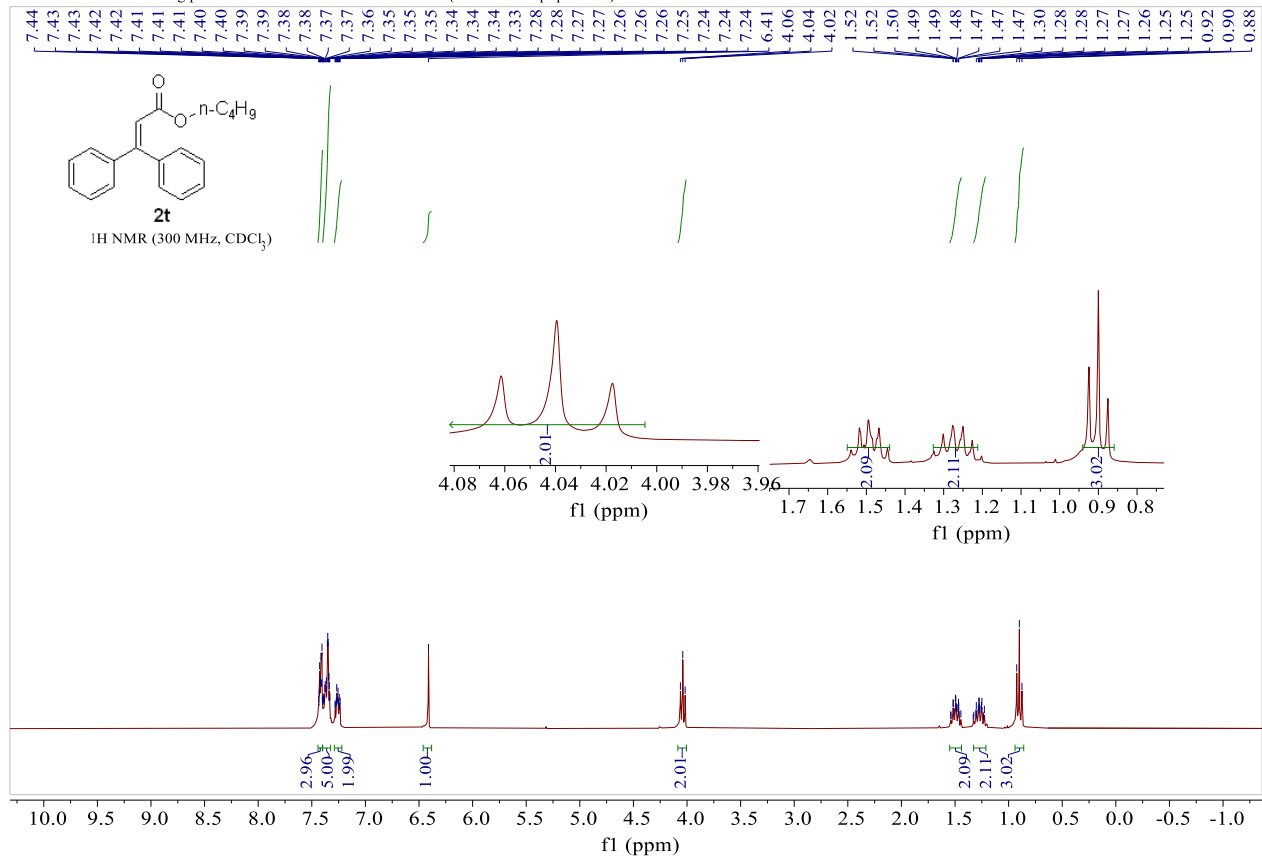

200217.314.11.fid — Fengqian Zhao zd-334-1-2 — Au13C CDCl3 (C:\Bruker\TopSpin3.6.0) 2002 14

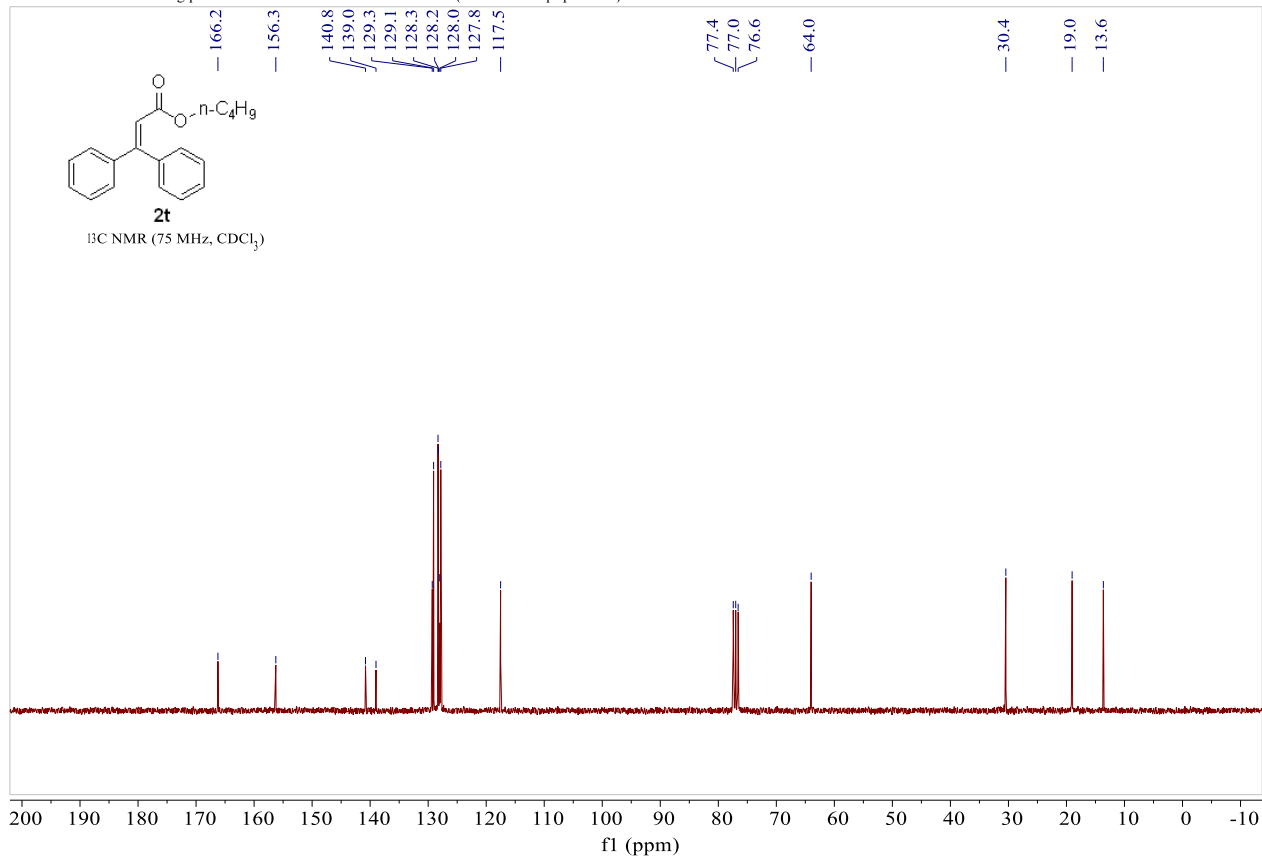

200131.407.10.fid — Fengqian Zhao zd-320 — Au1H CDCl3 {C:\Bruker\TopSpin3.5pl6} 2001 7

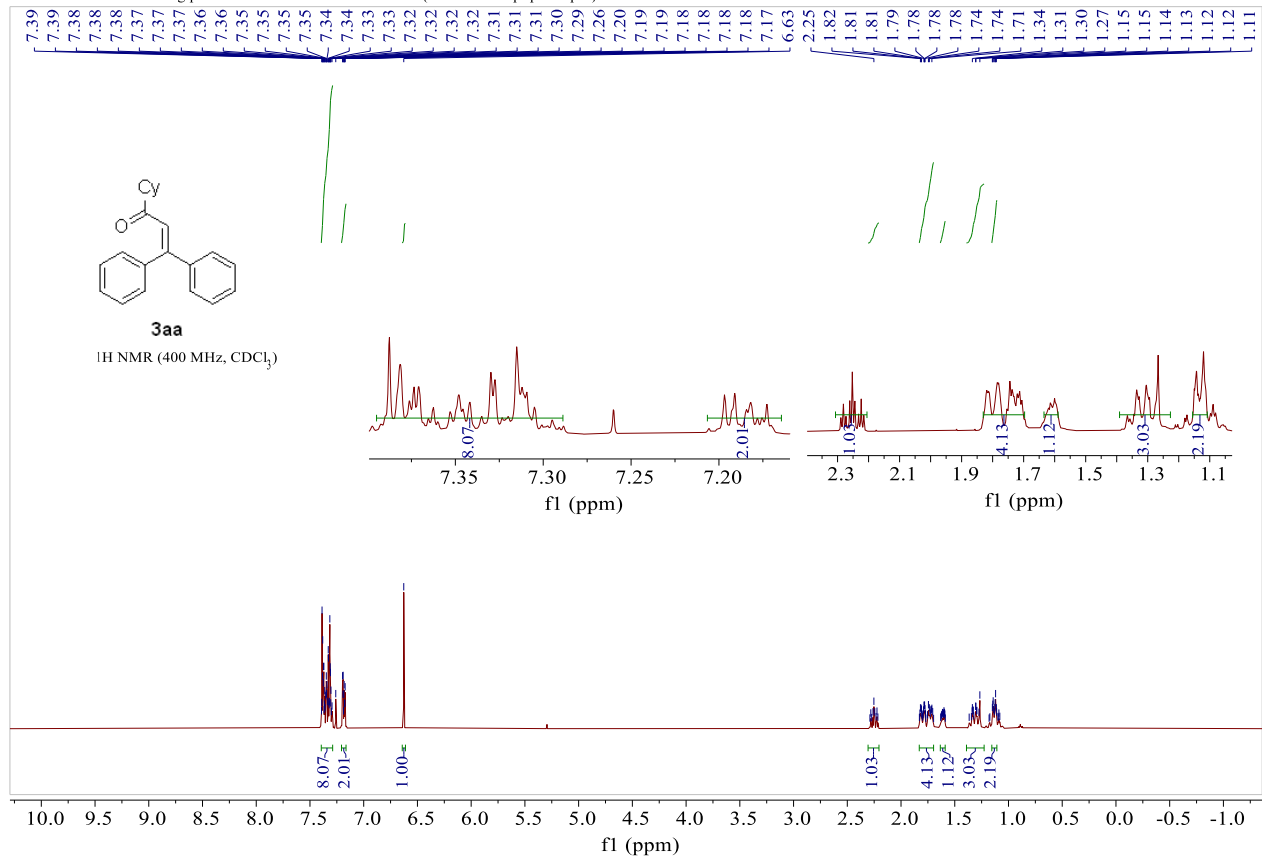

190203.f336.10.fid — Fengqian Zhao zd-320 — C13CPD CDCl3 {C:\Bruker\TopSpin3.6.0} 2002 36

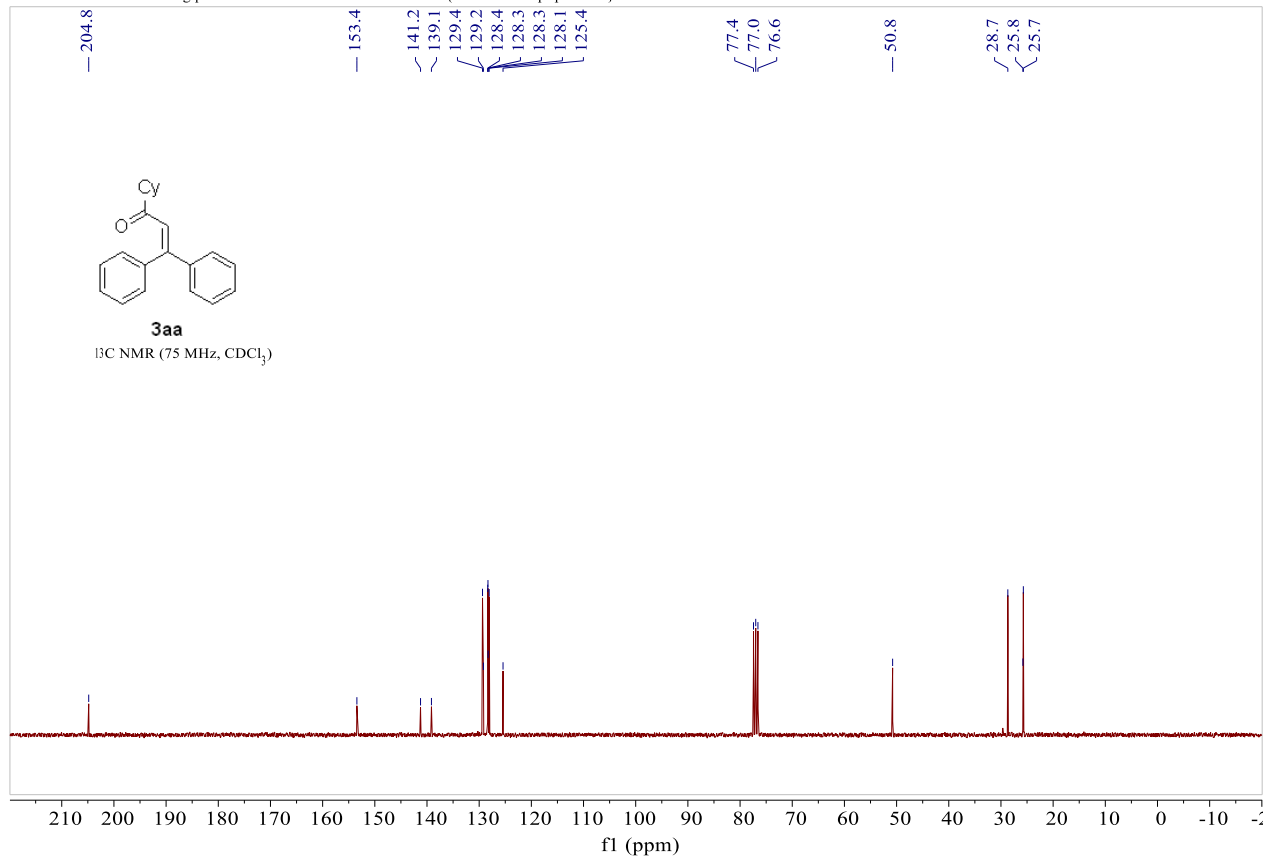

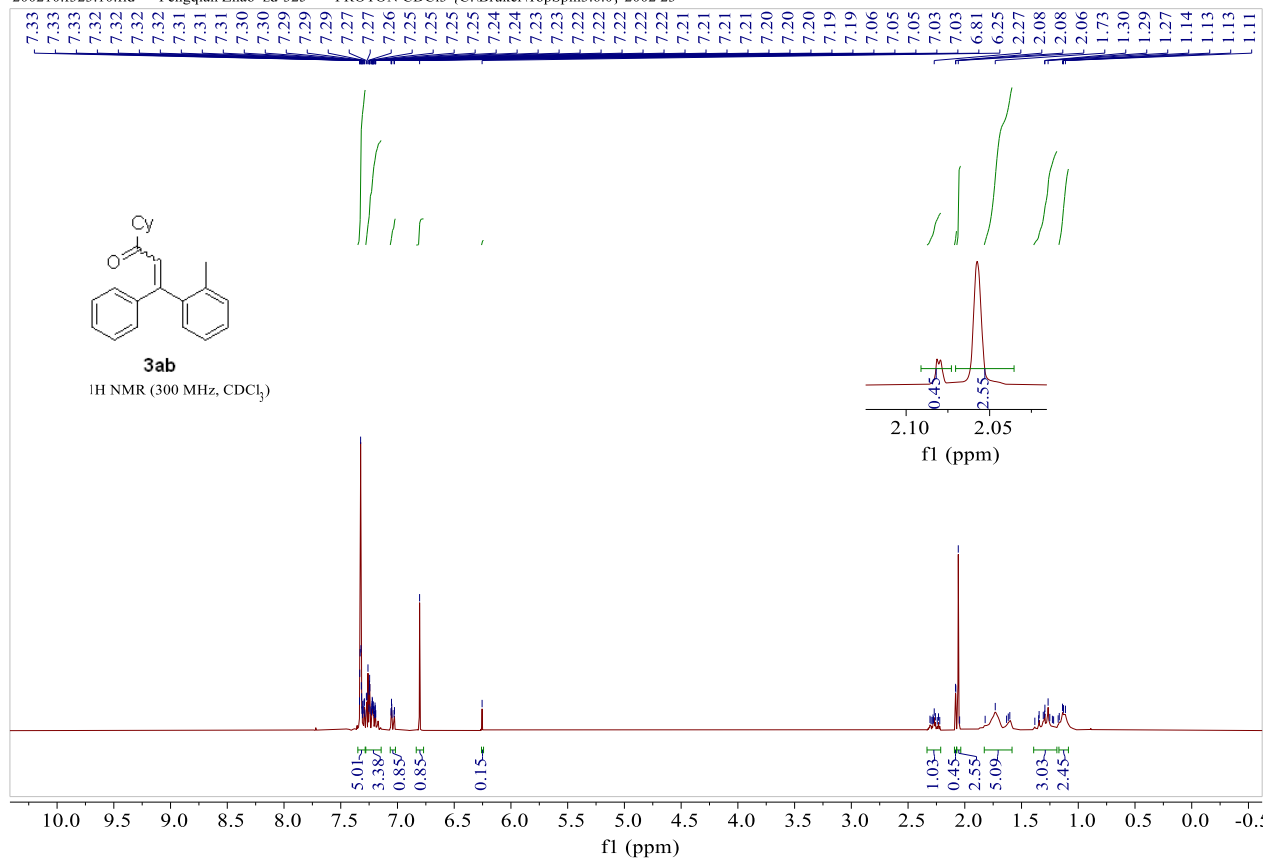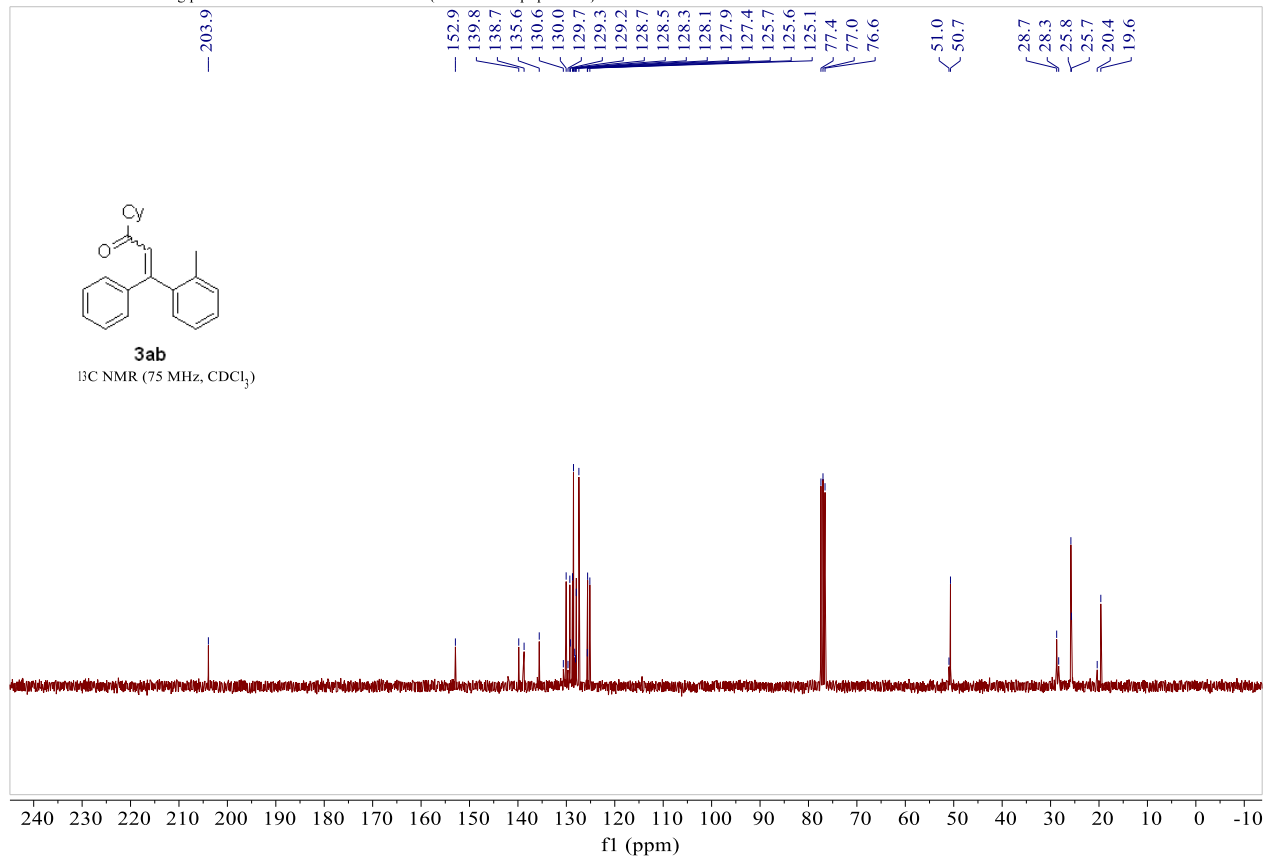

200204.f309.10.fid — Zhao/ zd-314 — PROTON CDC13 {C:\Bruker\TopSpin3.6.0} 2002 9

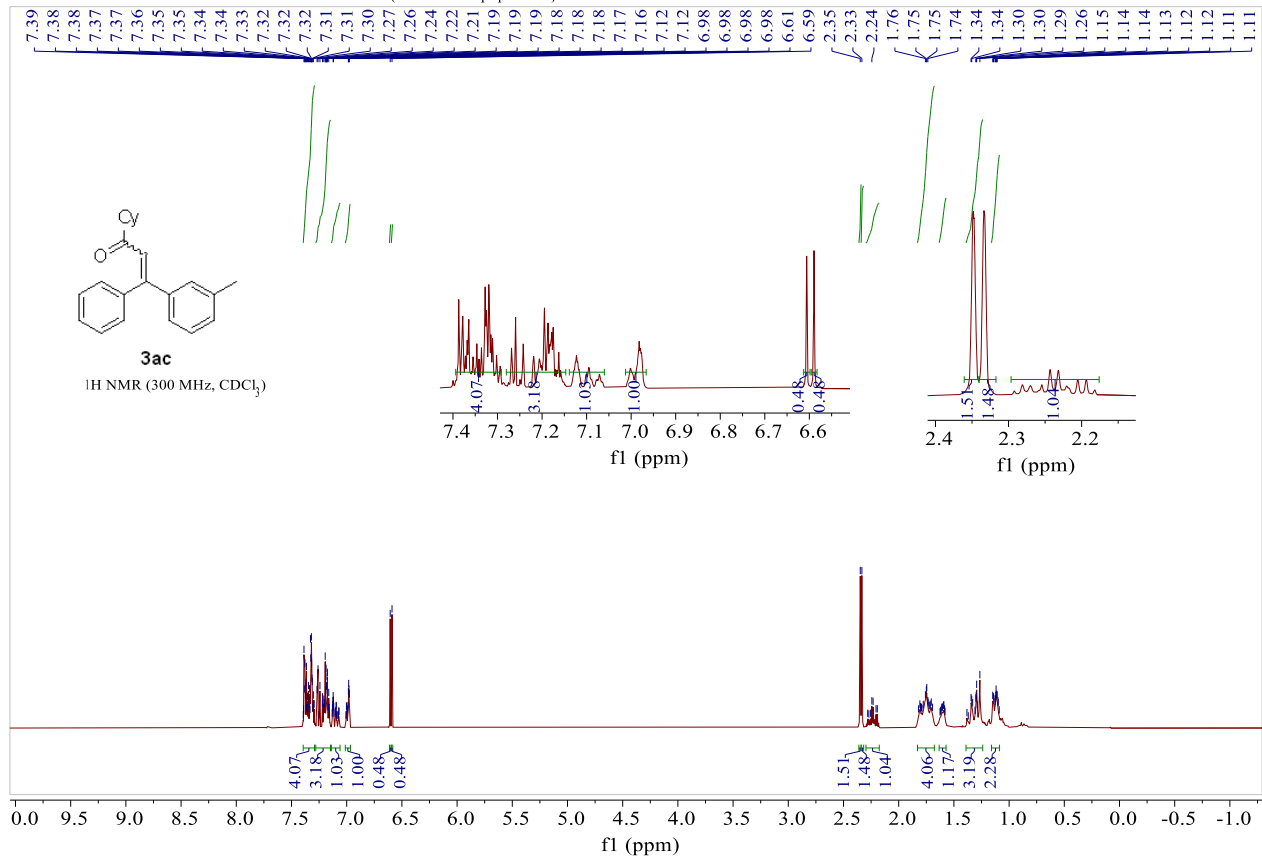

200207.f338.10.fid — Fengqian Zhao zd-314 — C13CPD CDC13 {C:\Bruker\TopSpin3.6.0} 2002 38

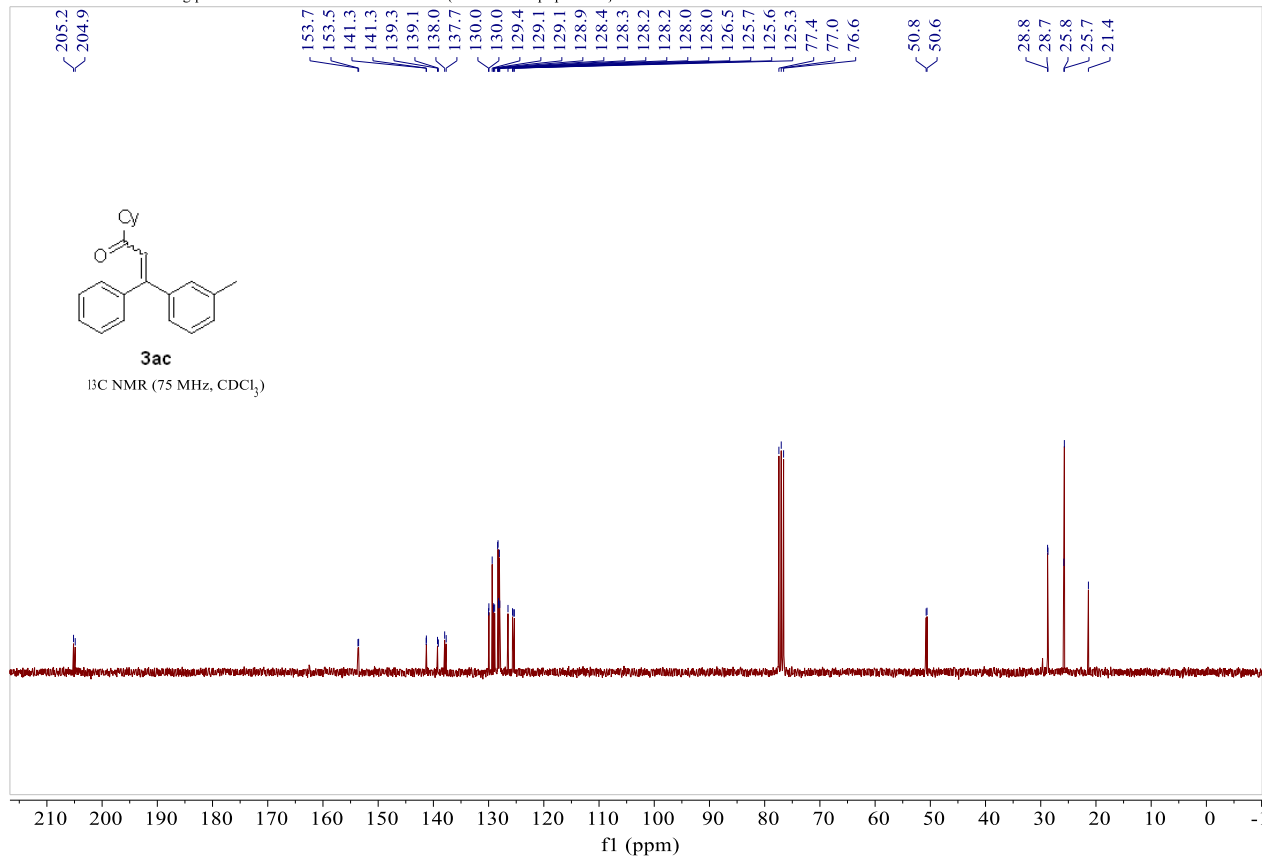

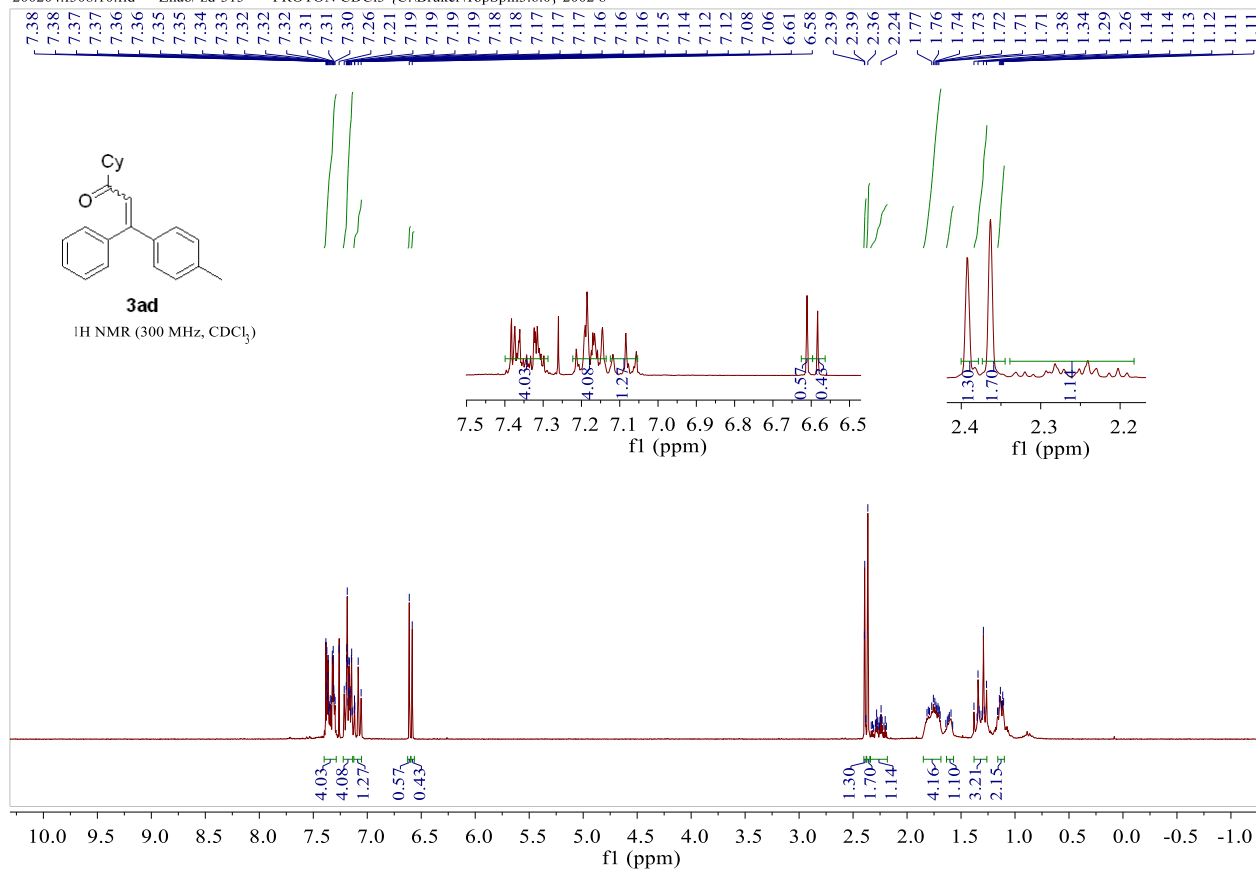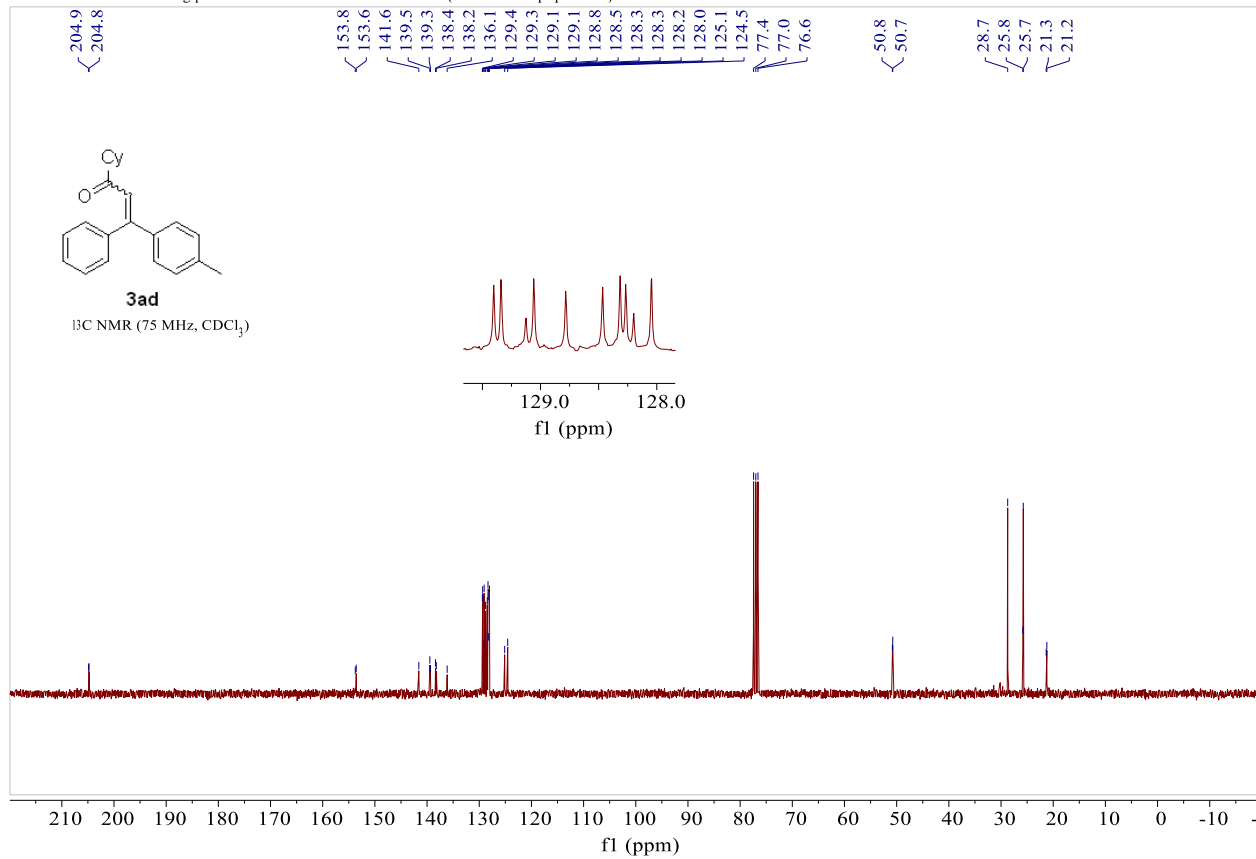



200131.406.10.fid — Fengqian Zhao zd-315 — Au1H CDCl3 {C:\Bruker\TopSpin3.5pl6} 2001 6

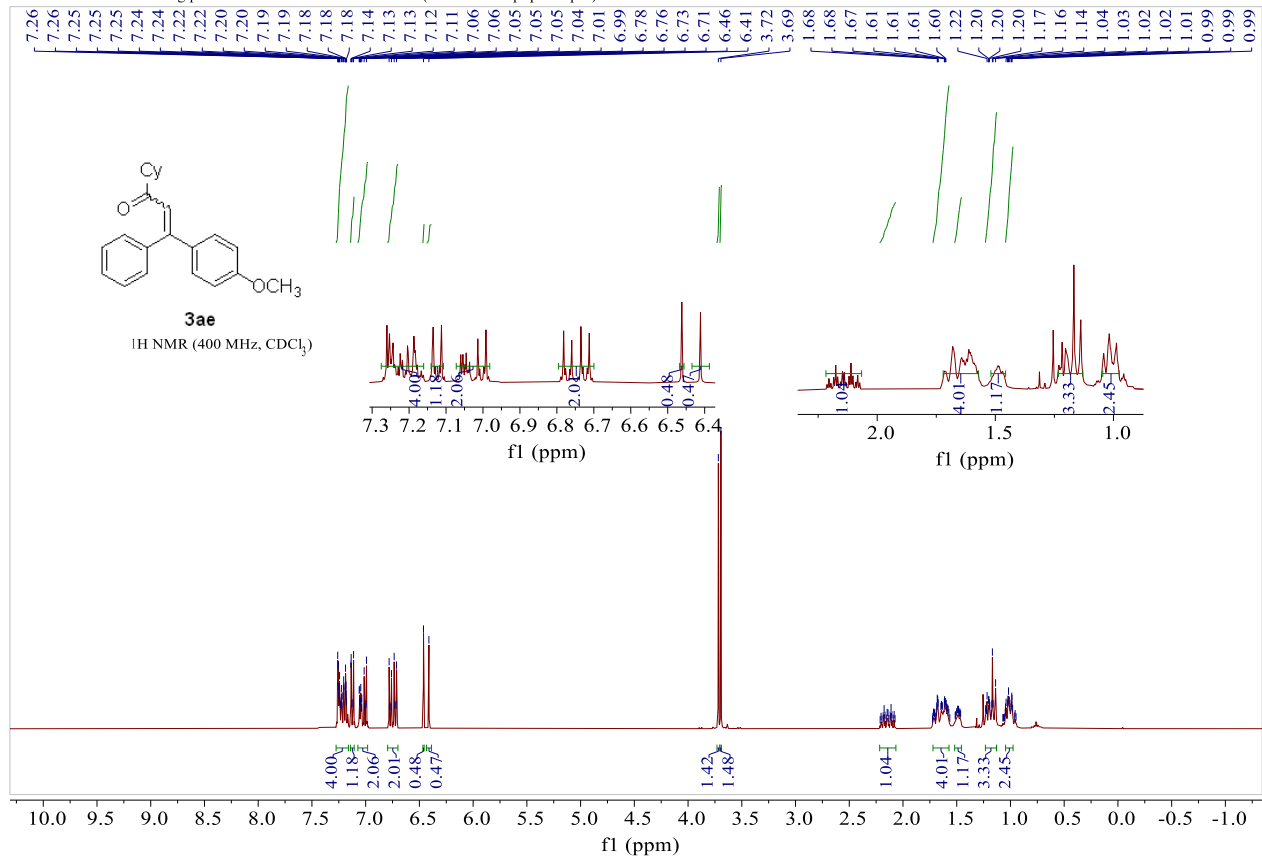

190203.f337.10.fid — Fengqian Zhao zd-315 — C13CPD CDCl3 {C:\Bruker\TopSpin3.6.0} 2002 37

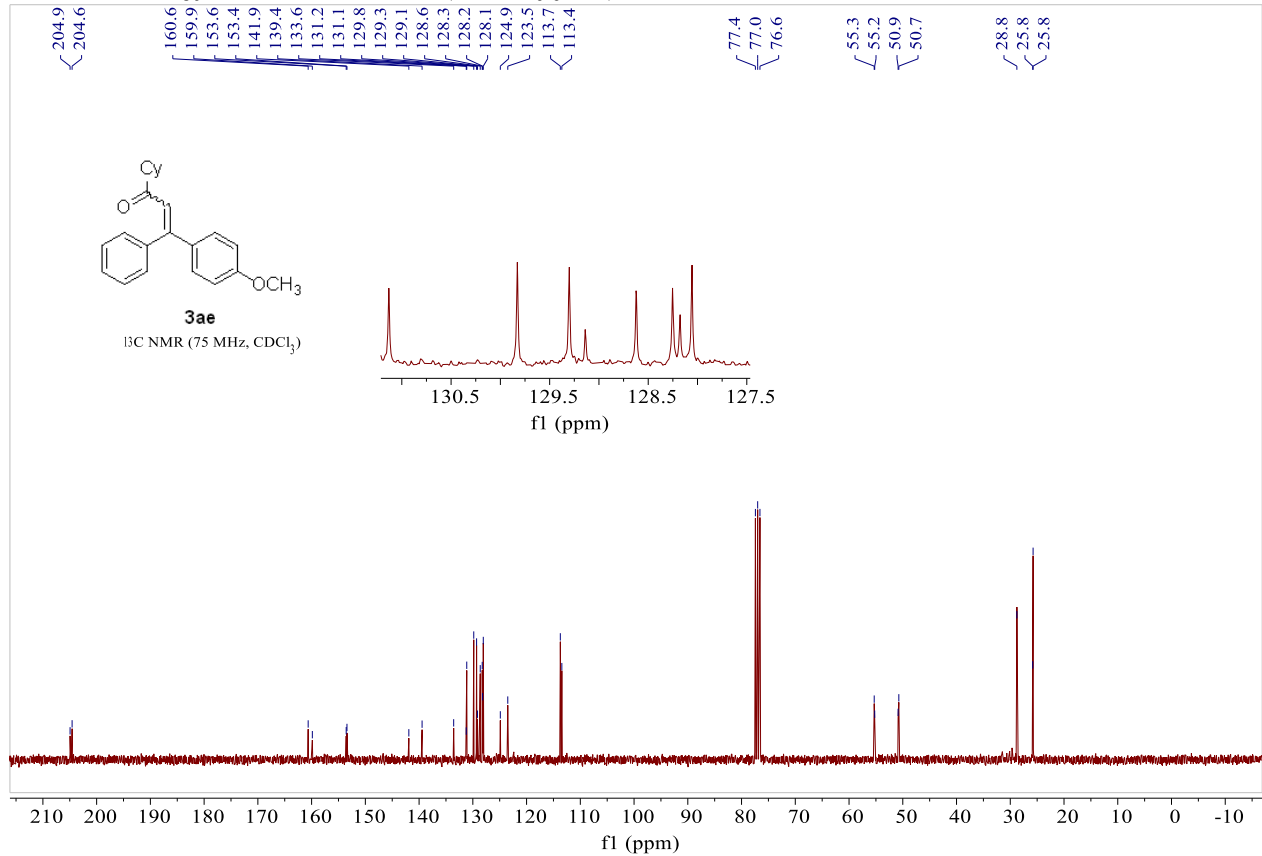

200219.306.10.fid — Fengqian Zhao zd-336 — Au1H CDCl3 {C:\Bruker\TopSpin3.6.0} 2002 6

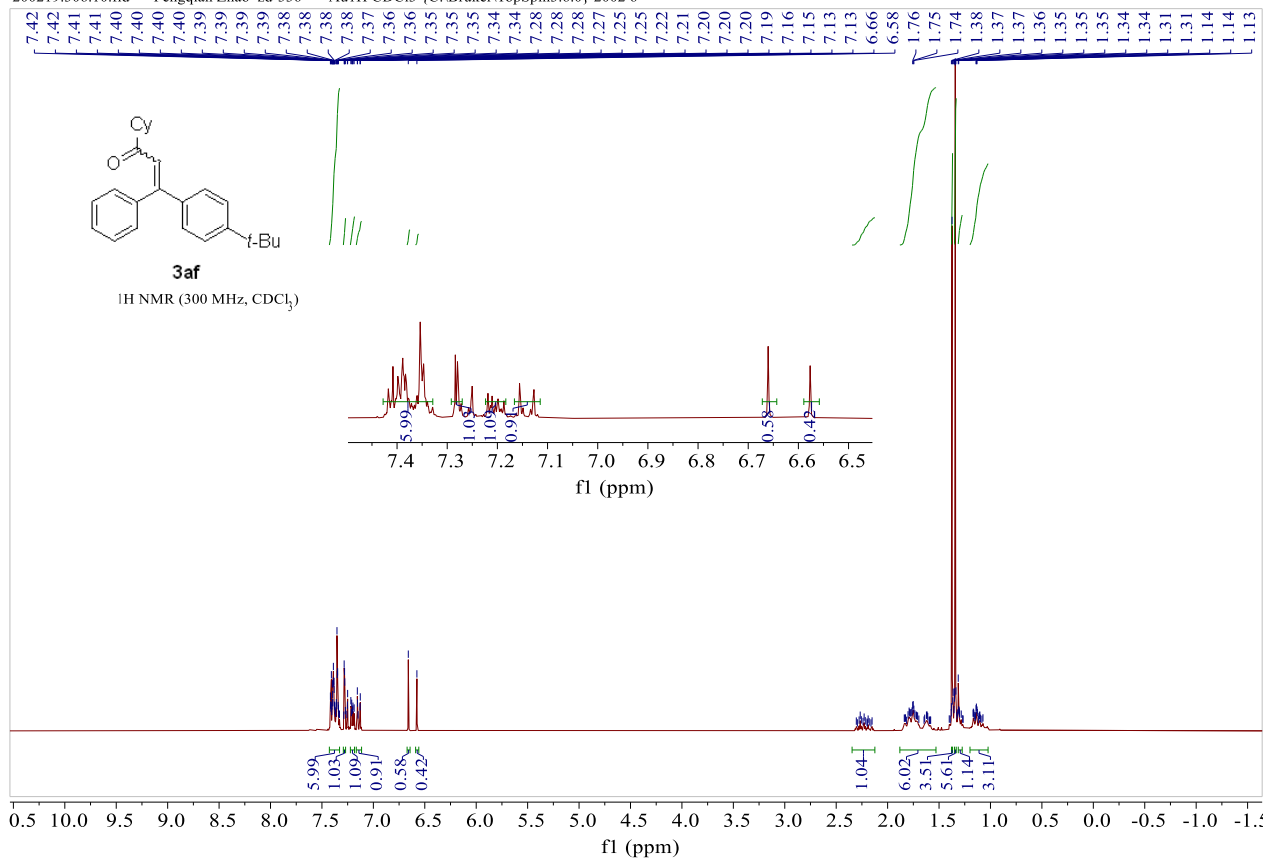

200219.306.11.fid — Fengqian Zhao zd-336 — Au13C CDCl3 {C:\Bruker\TopSpin3.6.0} 2002 6

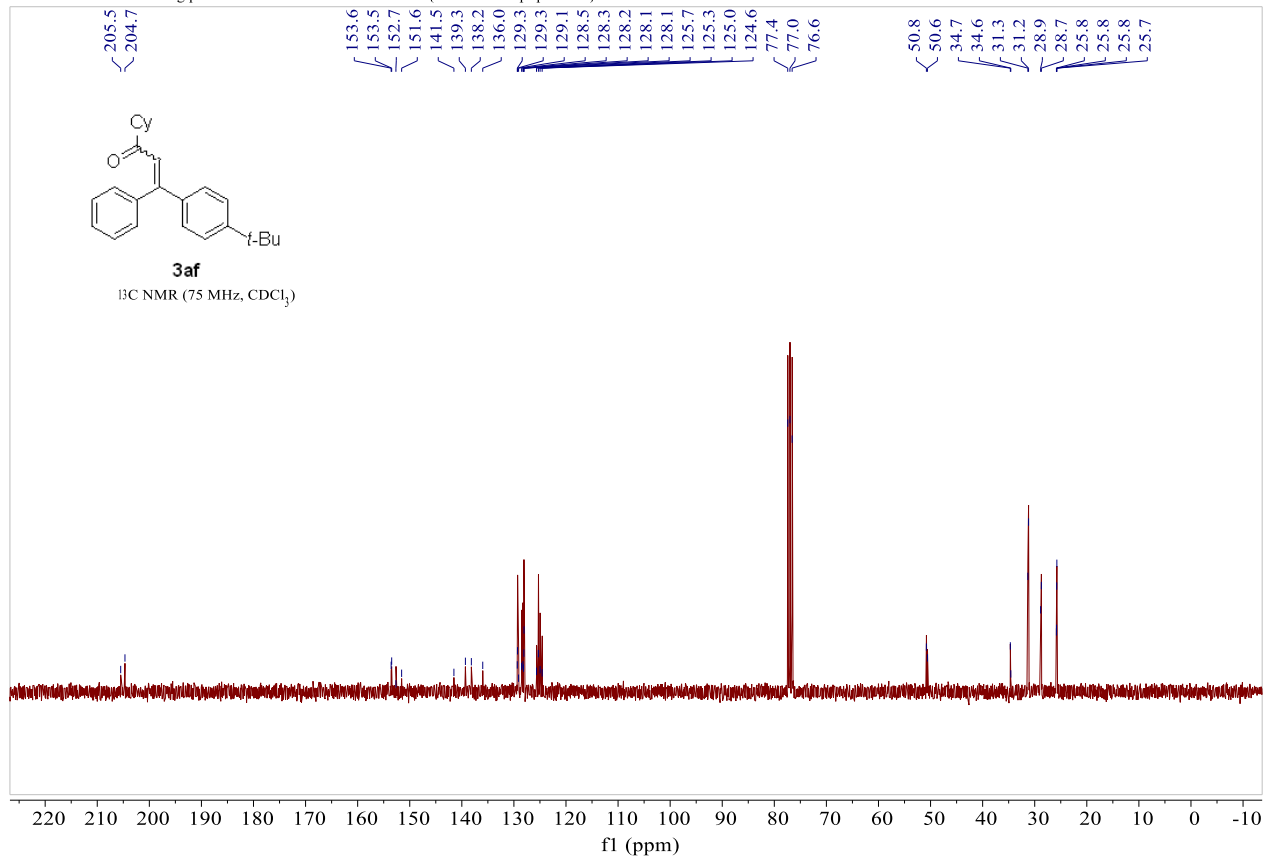

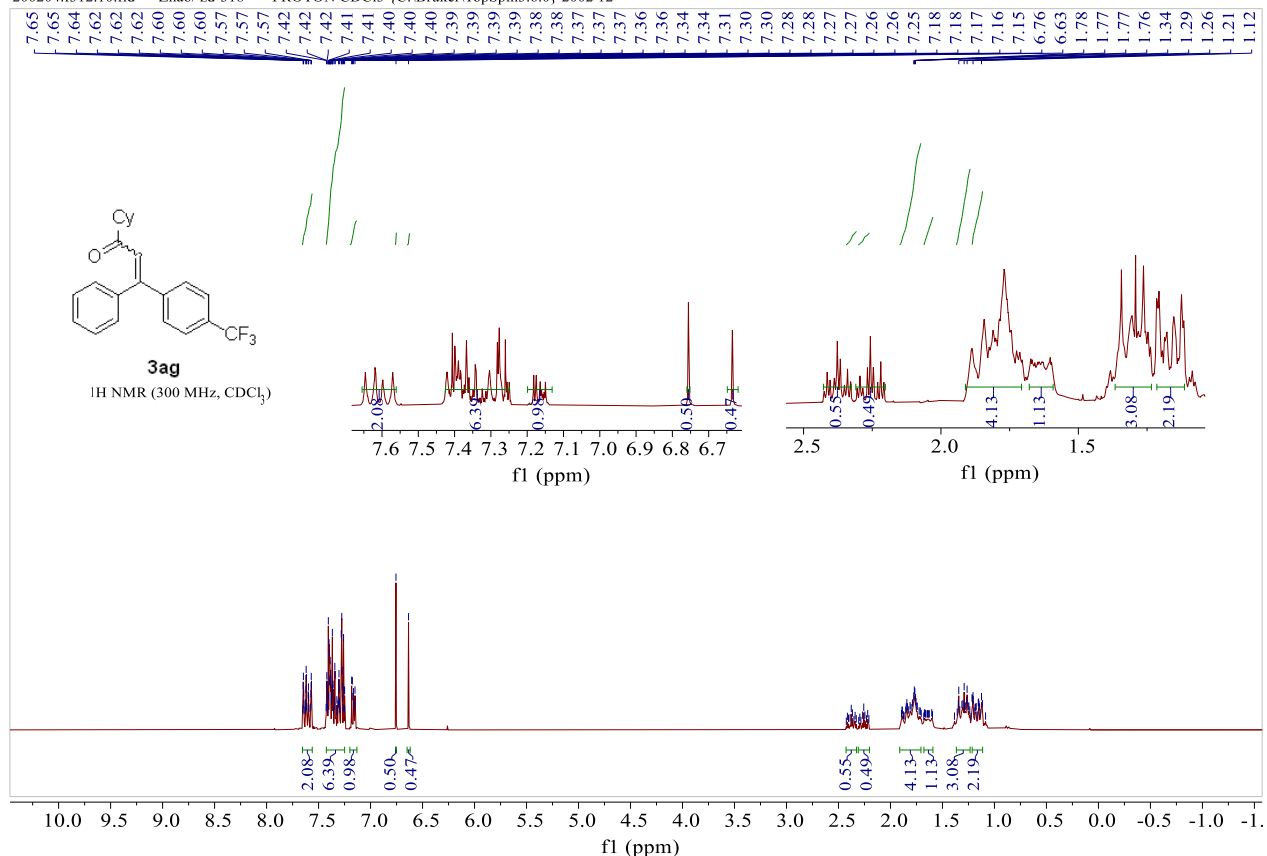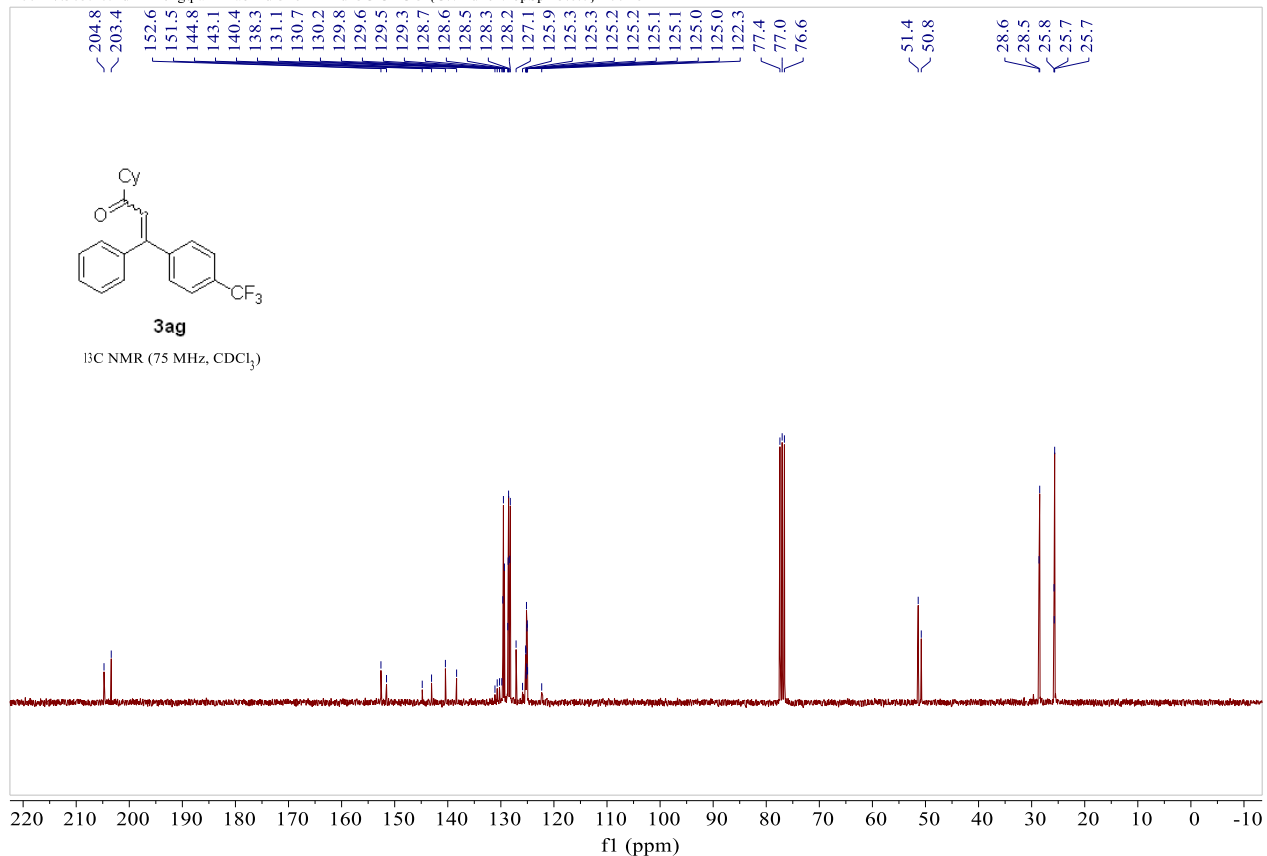

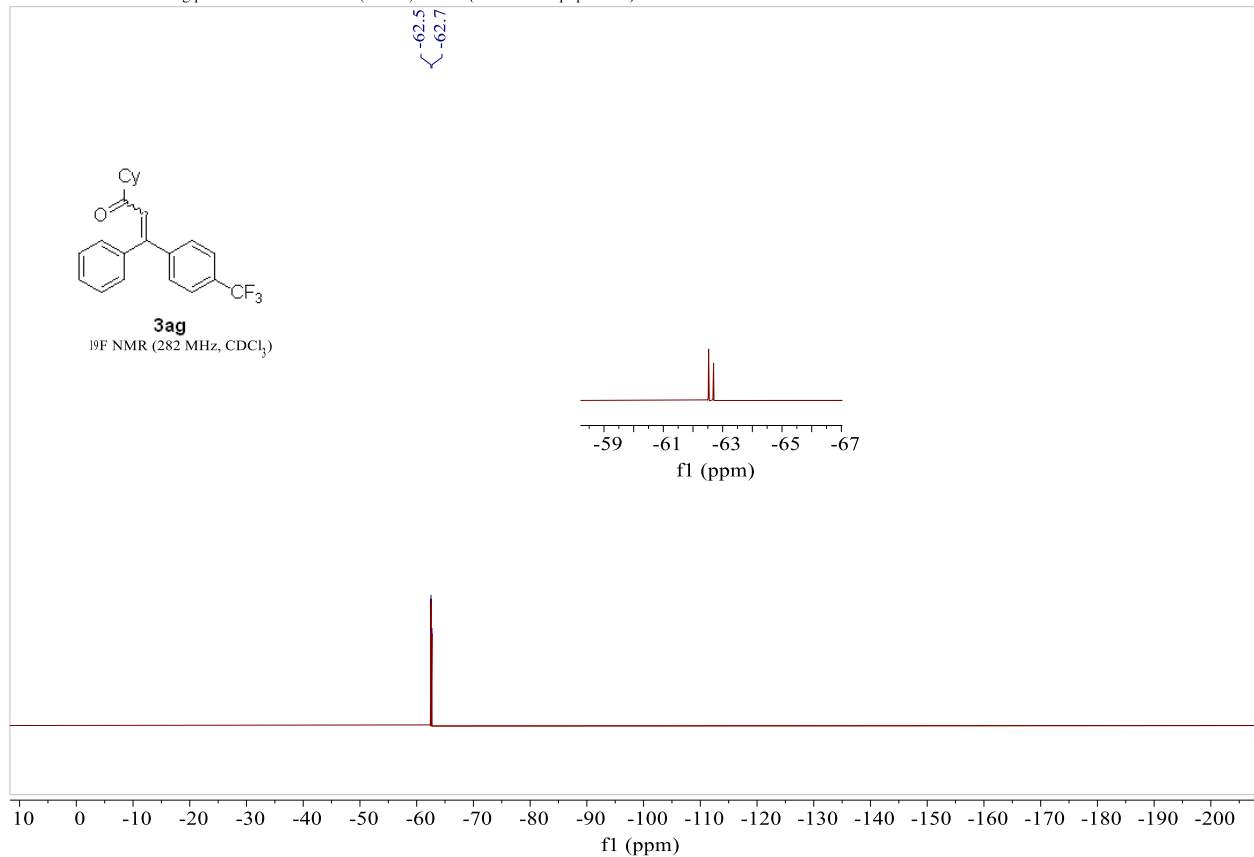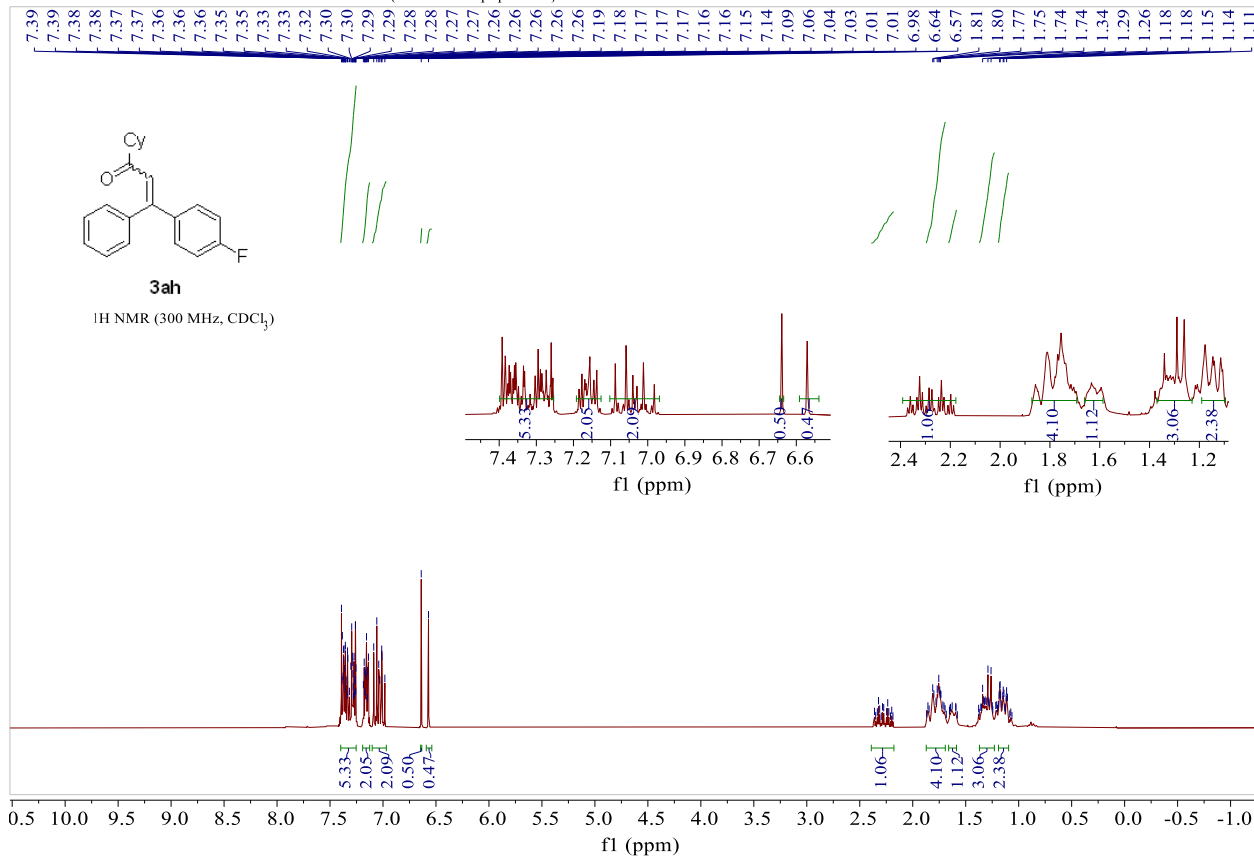

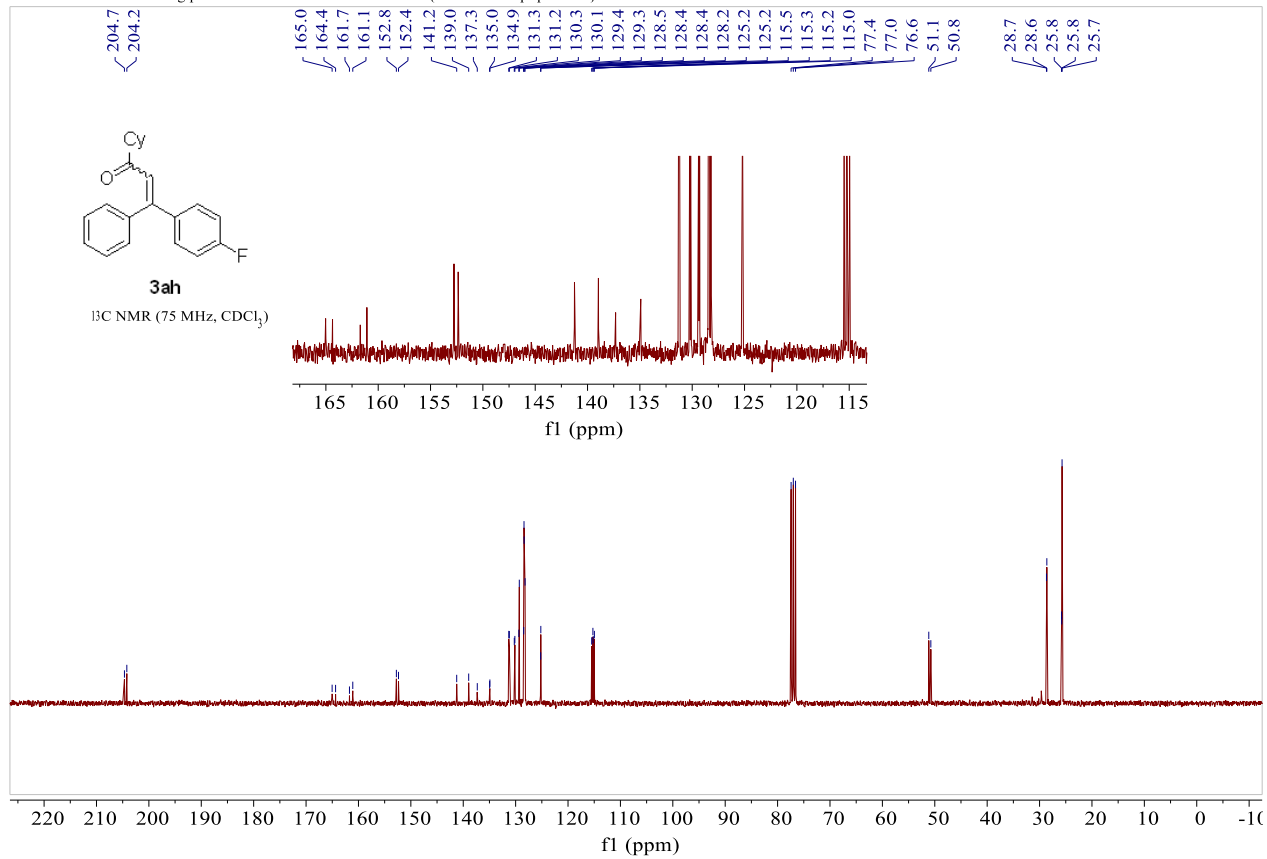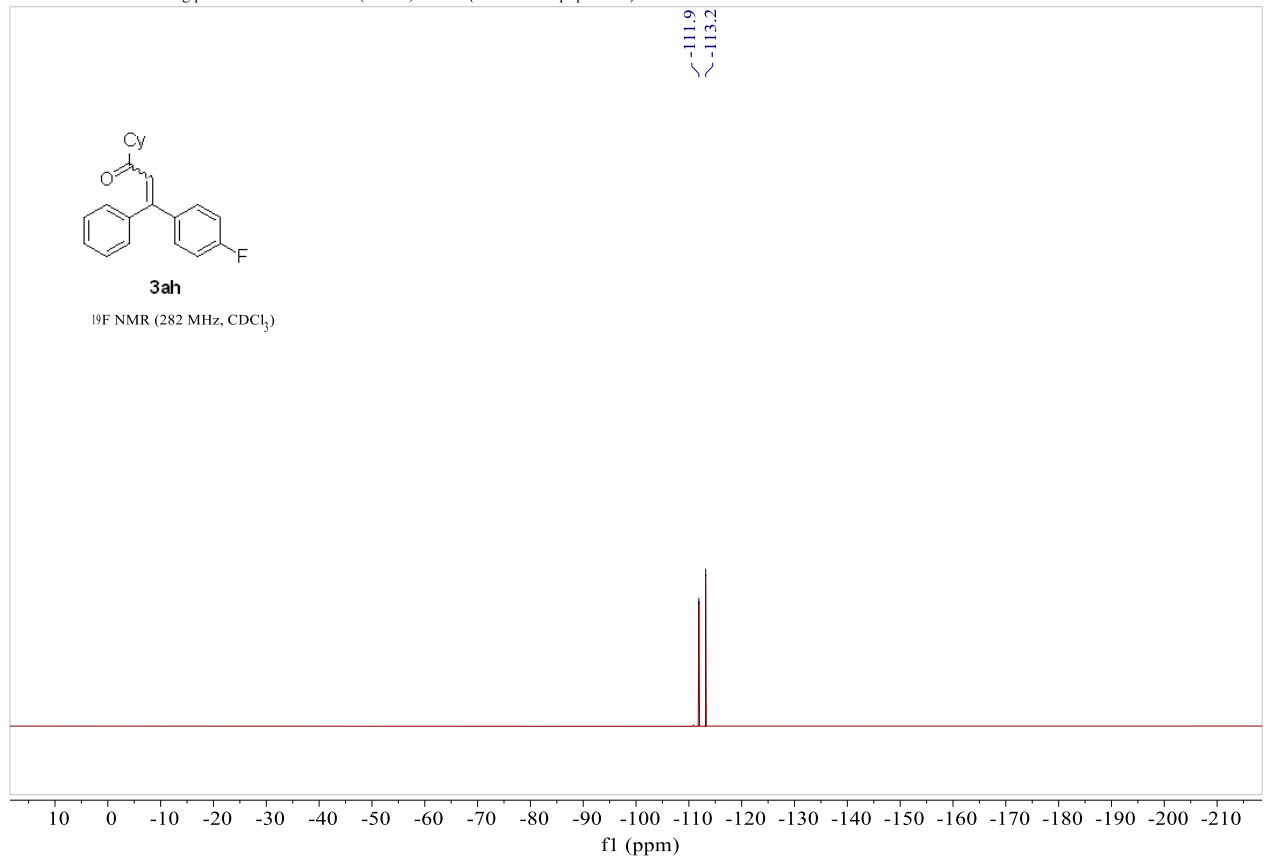

200302.417.10.fid — Fengqian Zhao zd-337 — Au1H CDCl3 {C:\Bruker\TopSpin3.5pl6} 2003 17

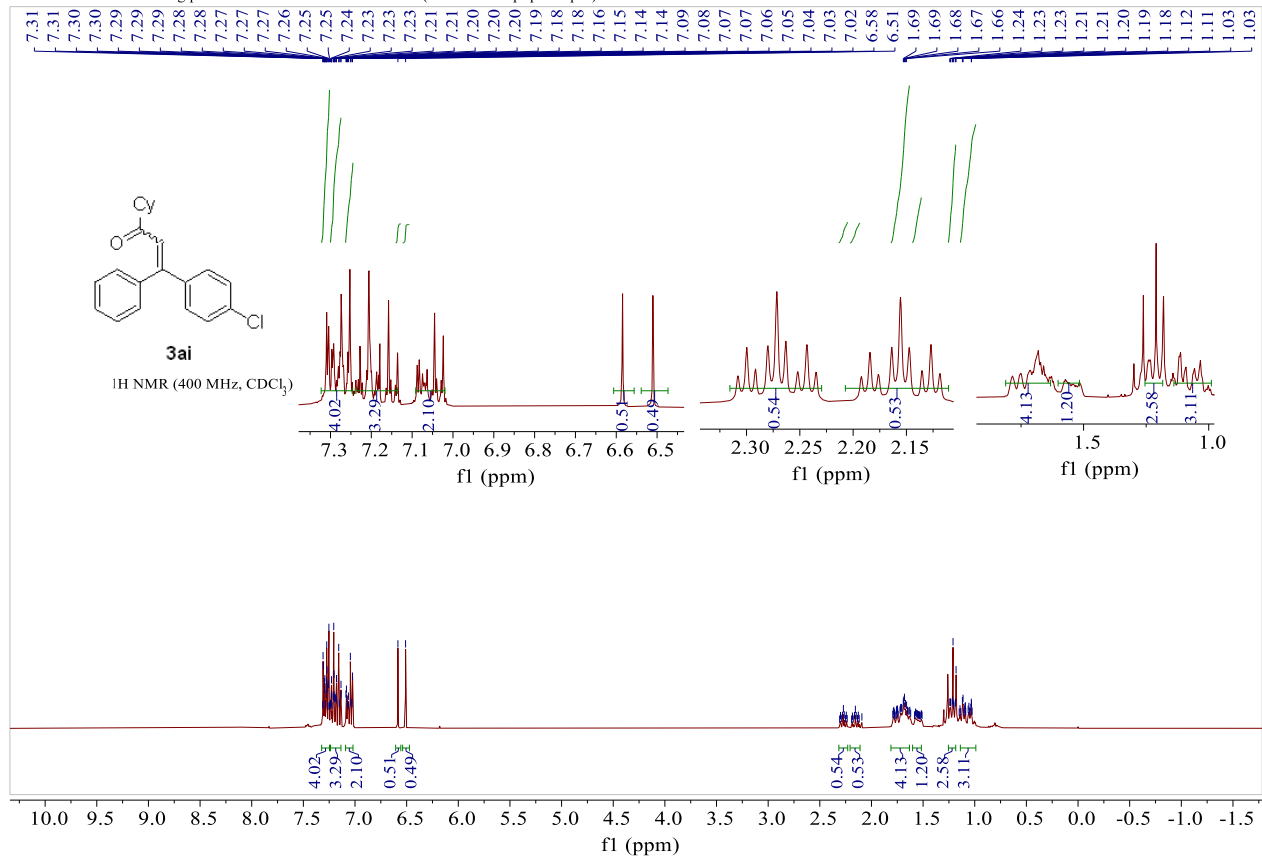

200302.417.11.fid — Fengqian Zhao zd-337 — Au13C CDCl3 {C:\Bruker\TopSpin3.5pl6} 2003 17

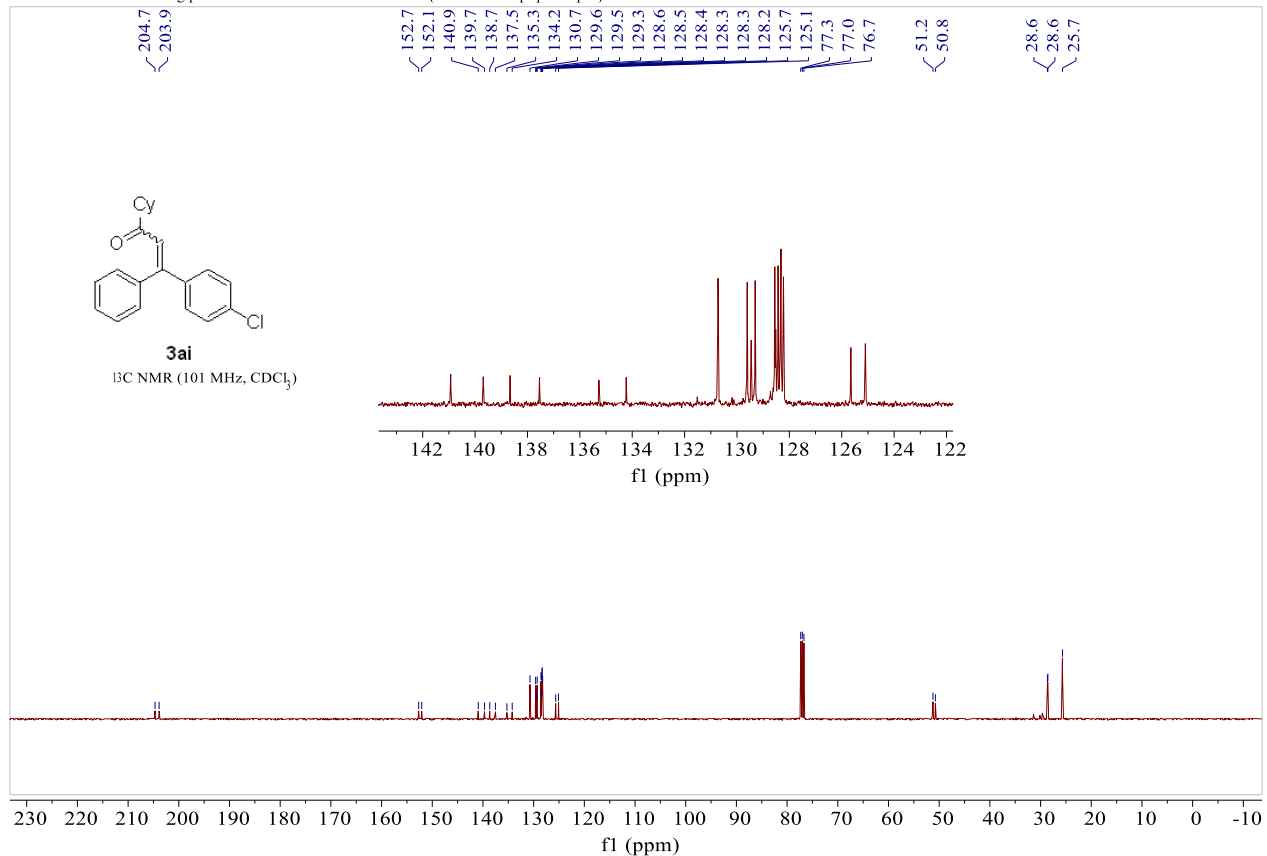

200204.f311.10.fid — Zhao/ zd-317 — PROTON CDCl<sub>3</sub> {C:\Bruker\TopSpin3.6.0} 2002 11

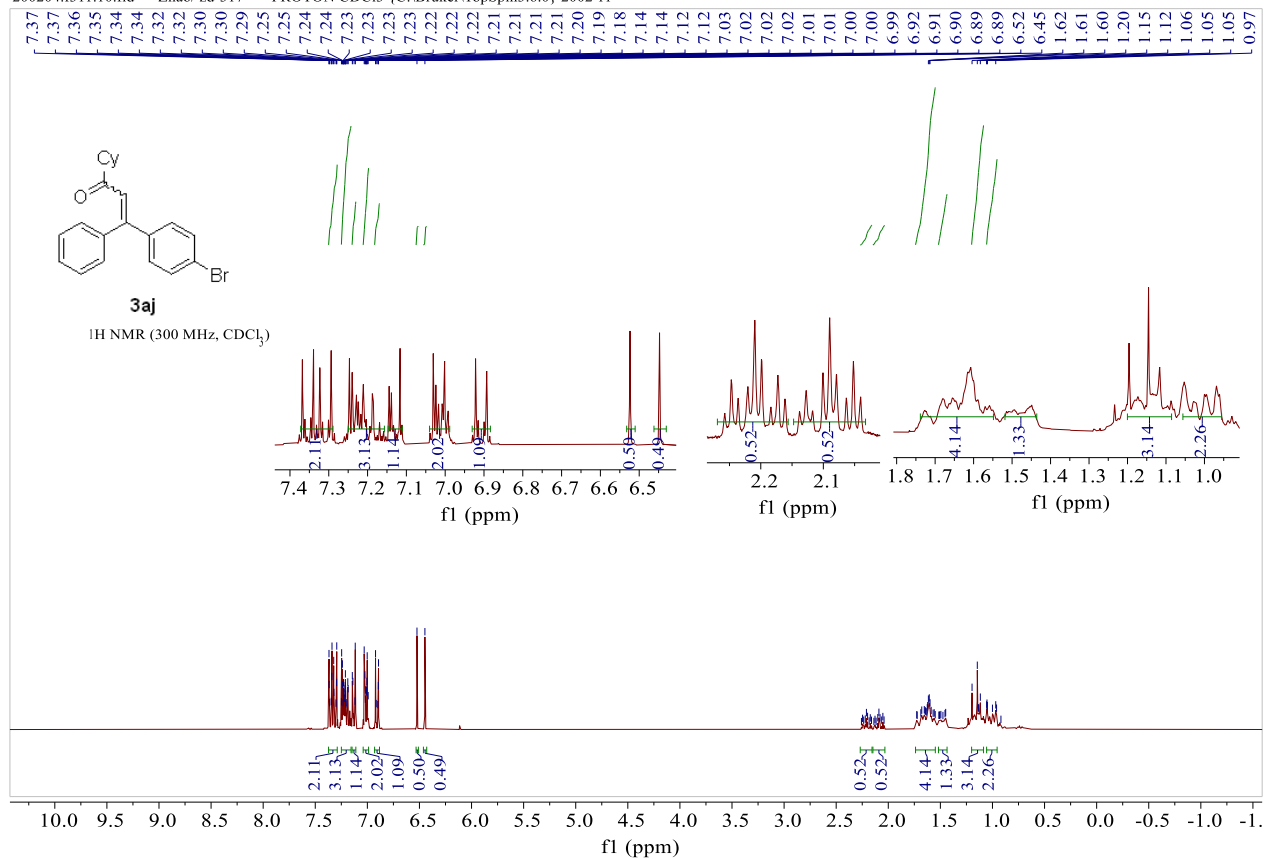

200207.f339.10.fid — Fengqian Zhao zd-317 — C13CPD CDCl<sub>3</sub> {C:\Bruker\TopSpin3.6.0} 2002 39

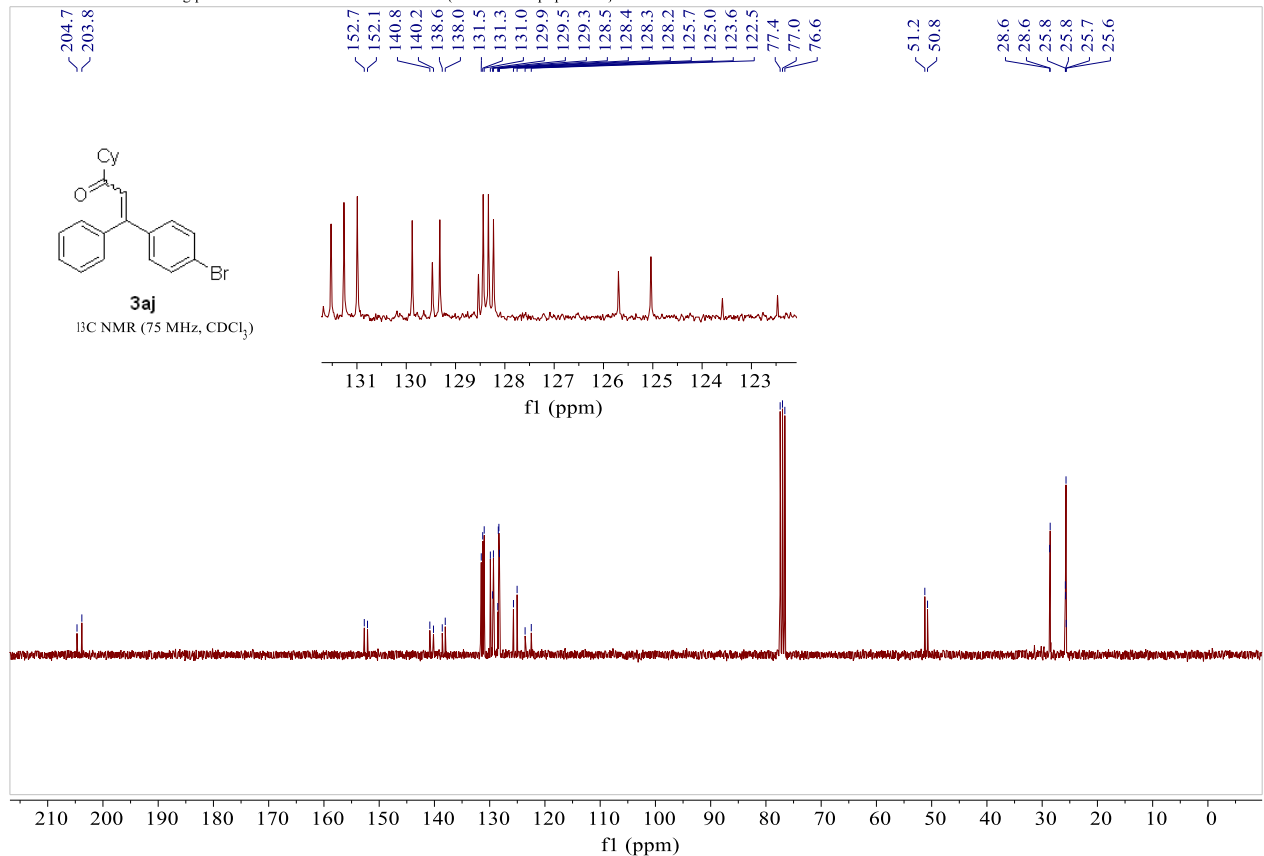

200330.f329.10.fid — Zhao/ Zd-407 — PROTON CDCl<sub>3</sub> {C:\Bruker\TopSpin3.6.0} 2003 29

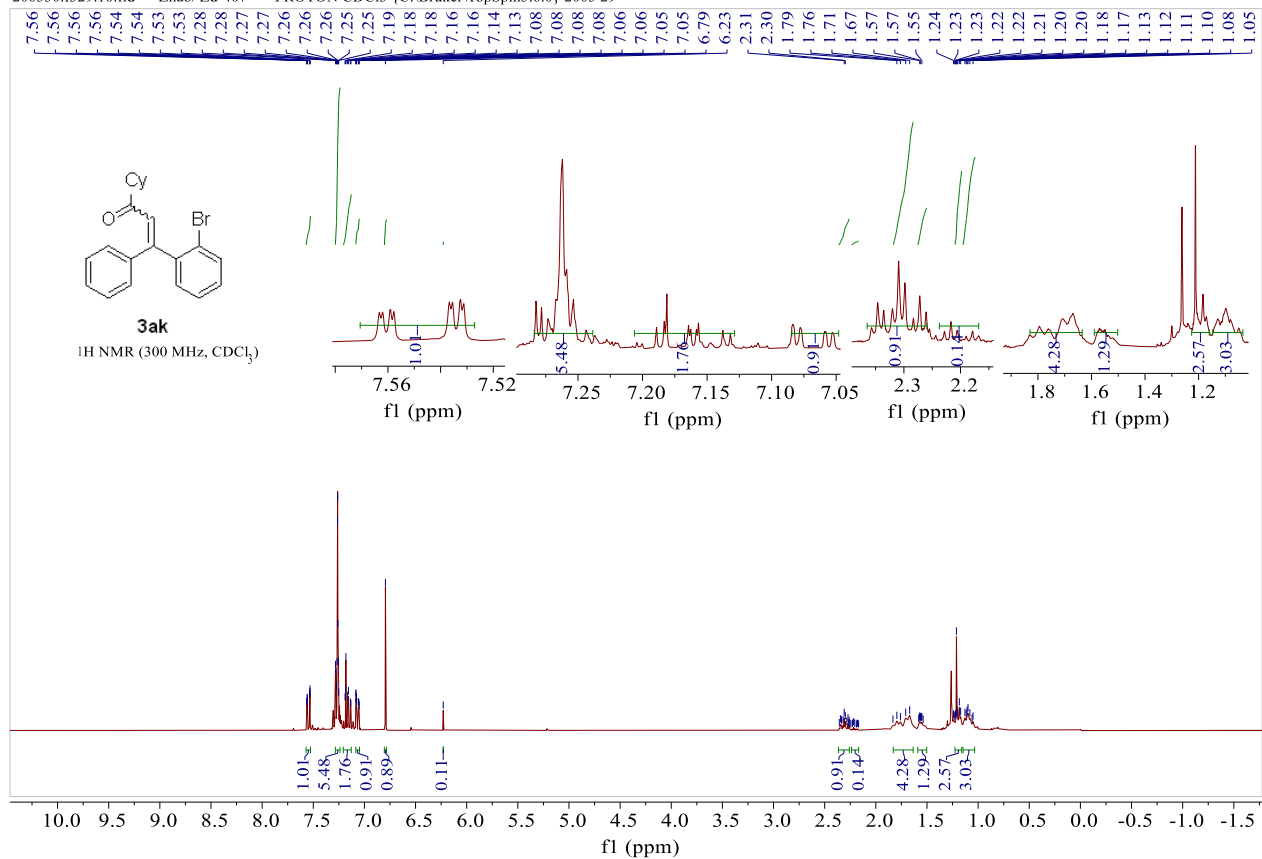

200330.f329.11.fid — Zhao/ Zd-407 — C13CPD CDCl<sub>3</sub> {C:\Bruker\TopSpin3.6.0} 2003 29

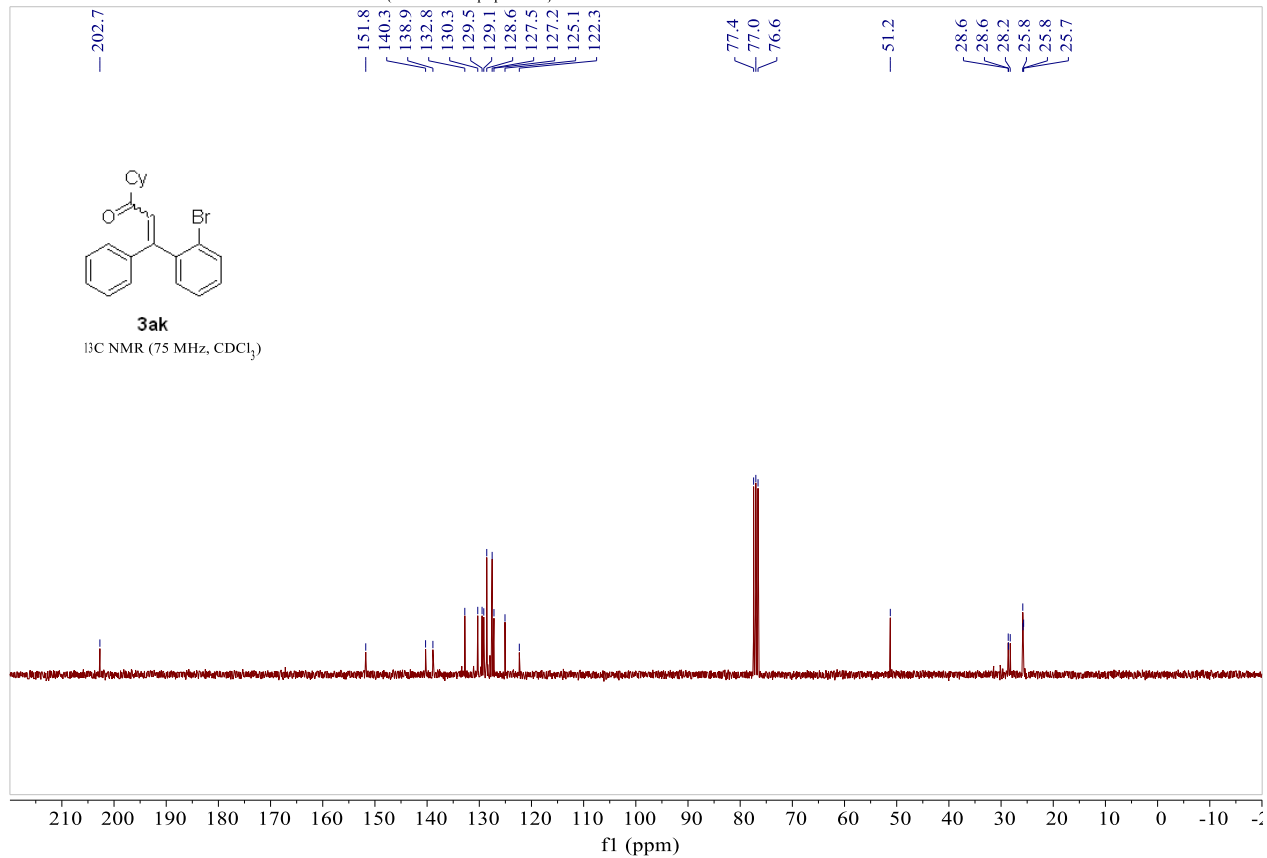



200210.f320.10.fid — Fengqian Zhao zd-321 — PROTON CDCl3 {C:\Bruker\TopSpin3.6.0} 2002 20

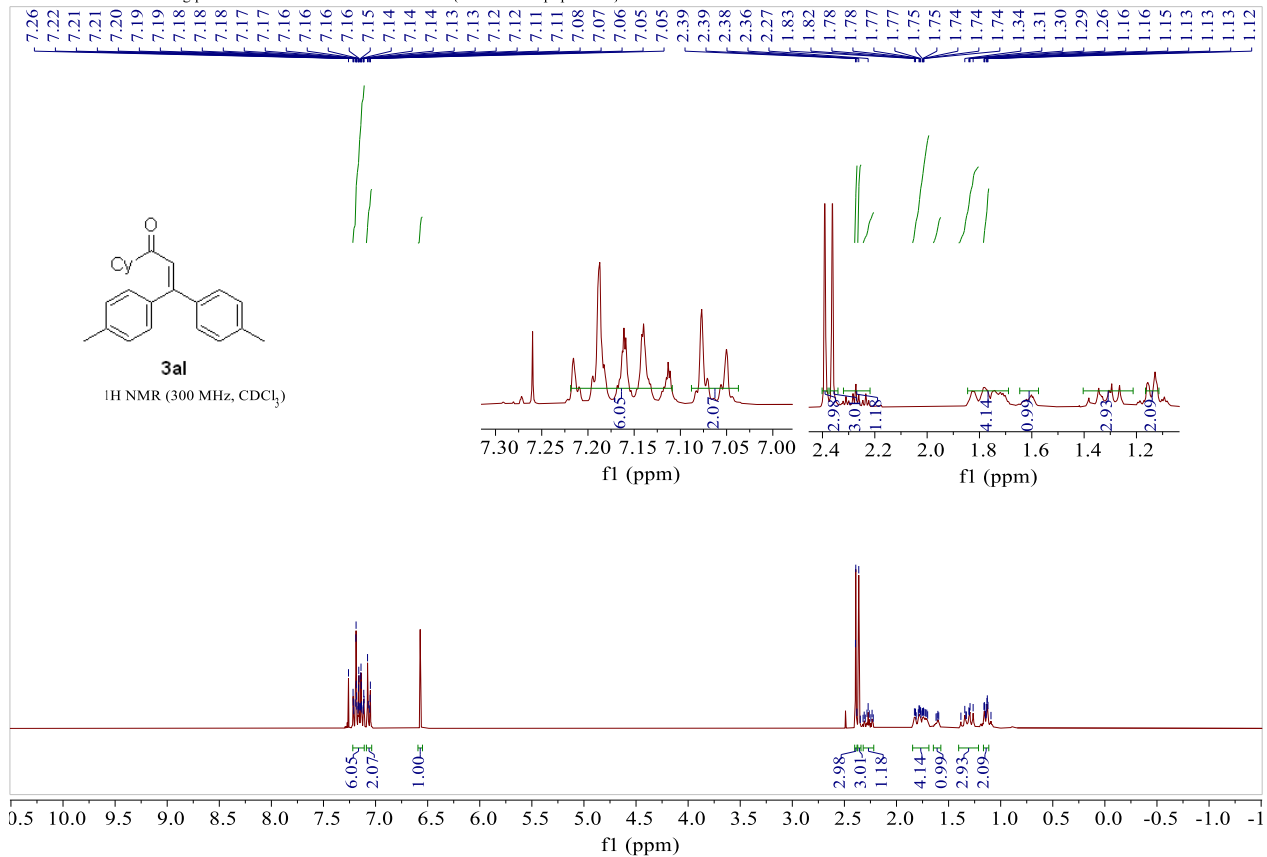

200217.306.10.fid — Fengqian Zhao zd-321 — Au13C CDCl3 {C:\Bruker\TopSpin3.6.0} 2002 6

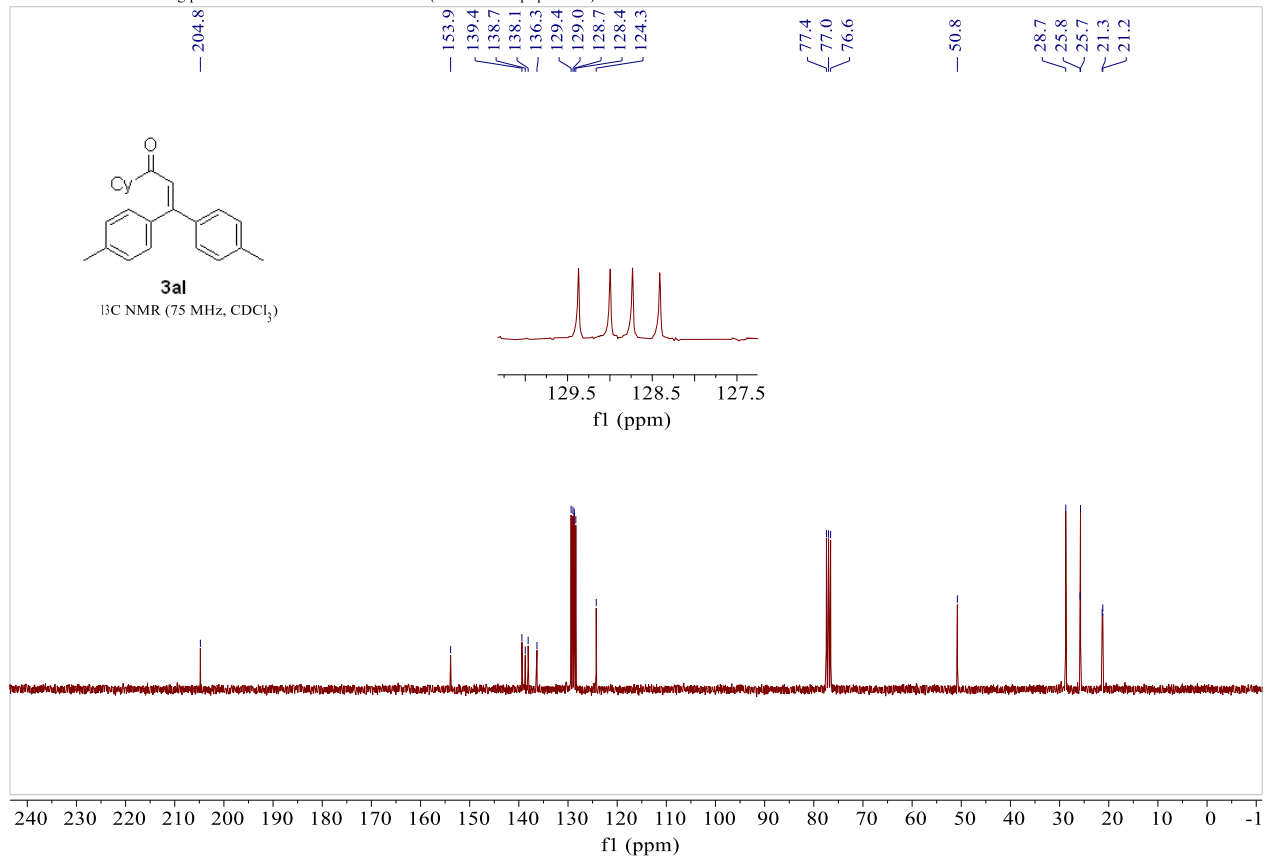

200210.f321.10.fid — Fengqian Zhao zd-322 — PROTON CDCl<sub>3</sub> {C:\Bruker\TopSpin3.6.0} 2002 21

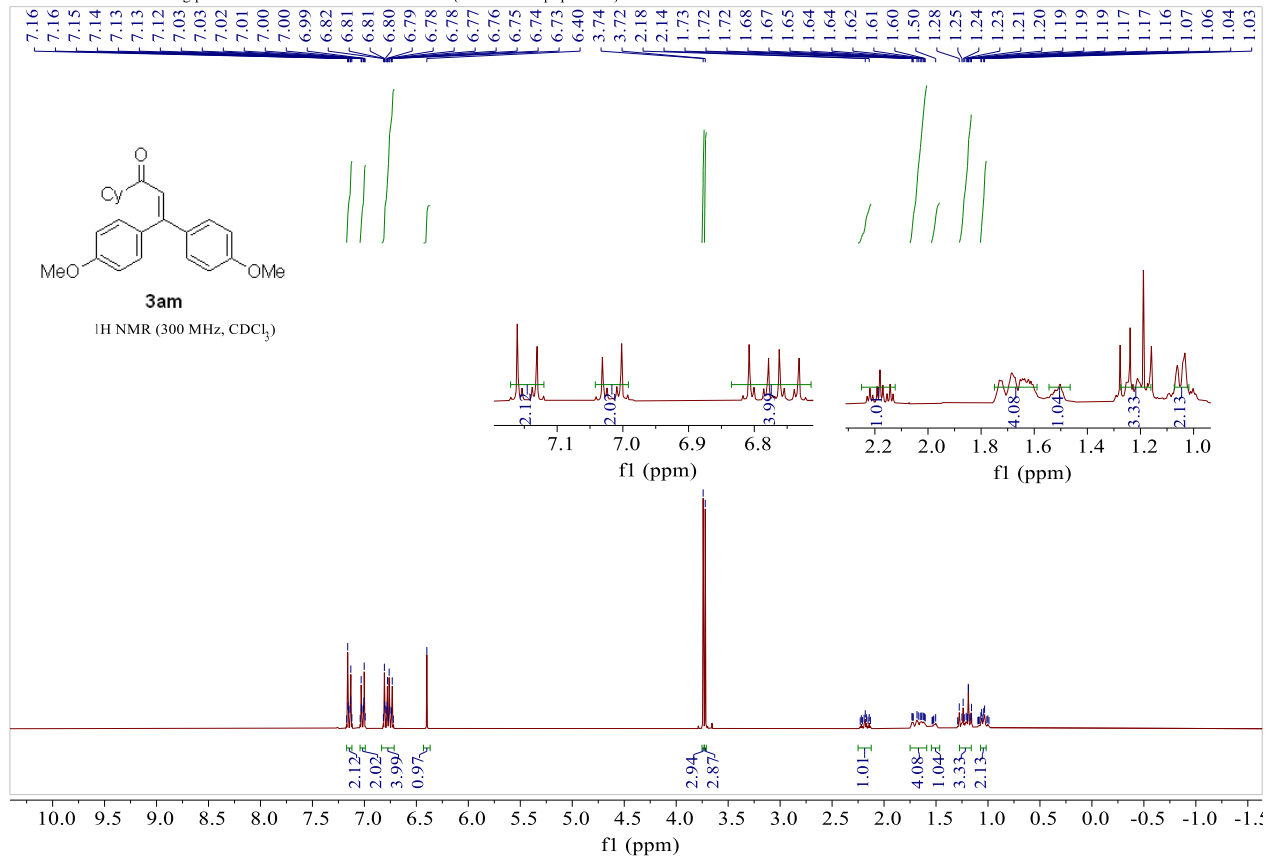

200217.307.10.fid — Fengqian Zhao zd-322 — Au13C CDCl<sub>3</sub> {C:\Bruker\TopSpin3.6.0} 2002 7

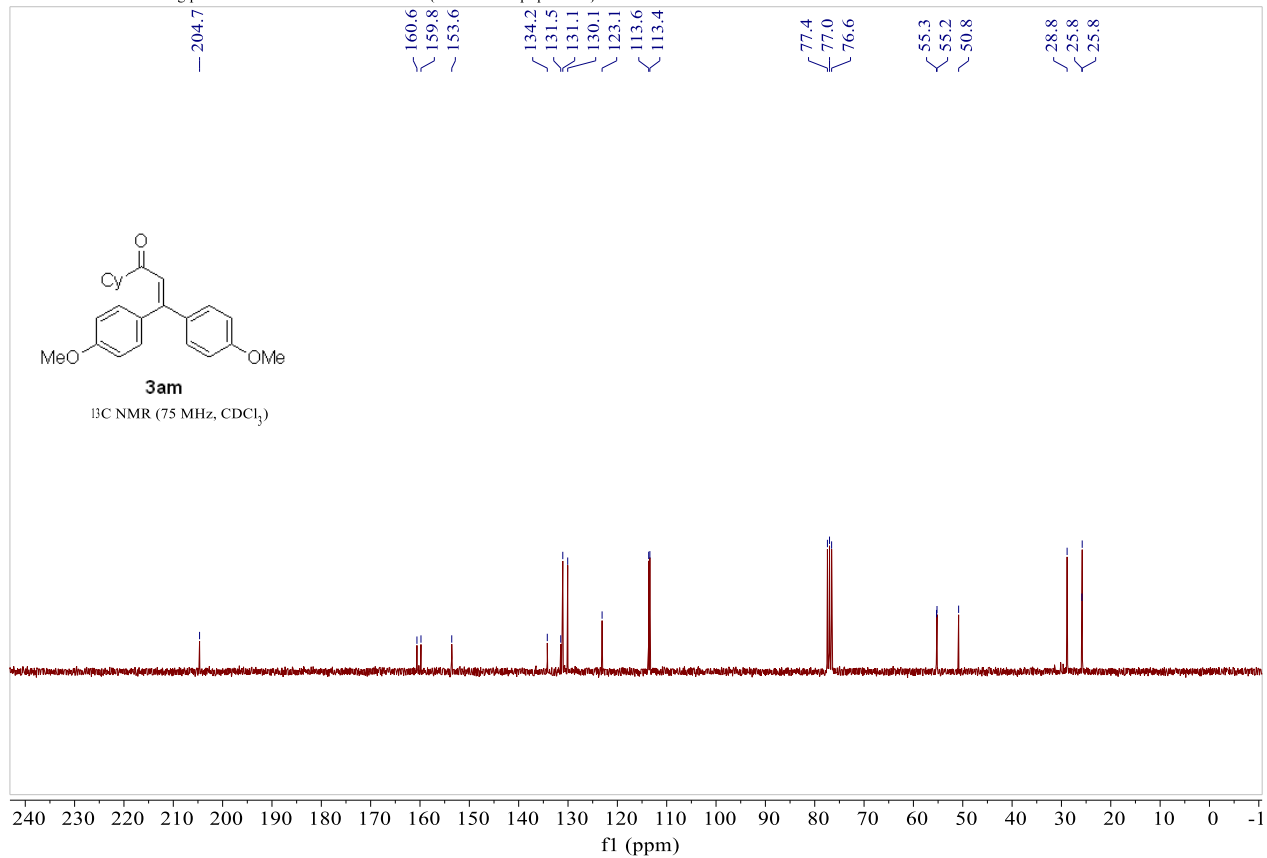

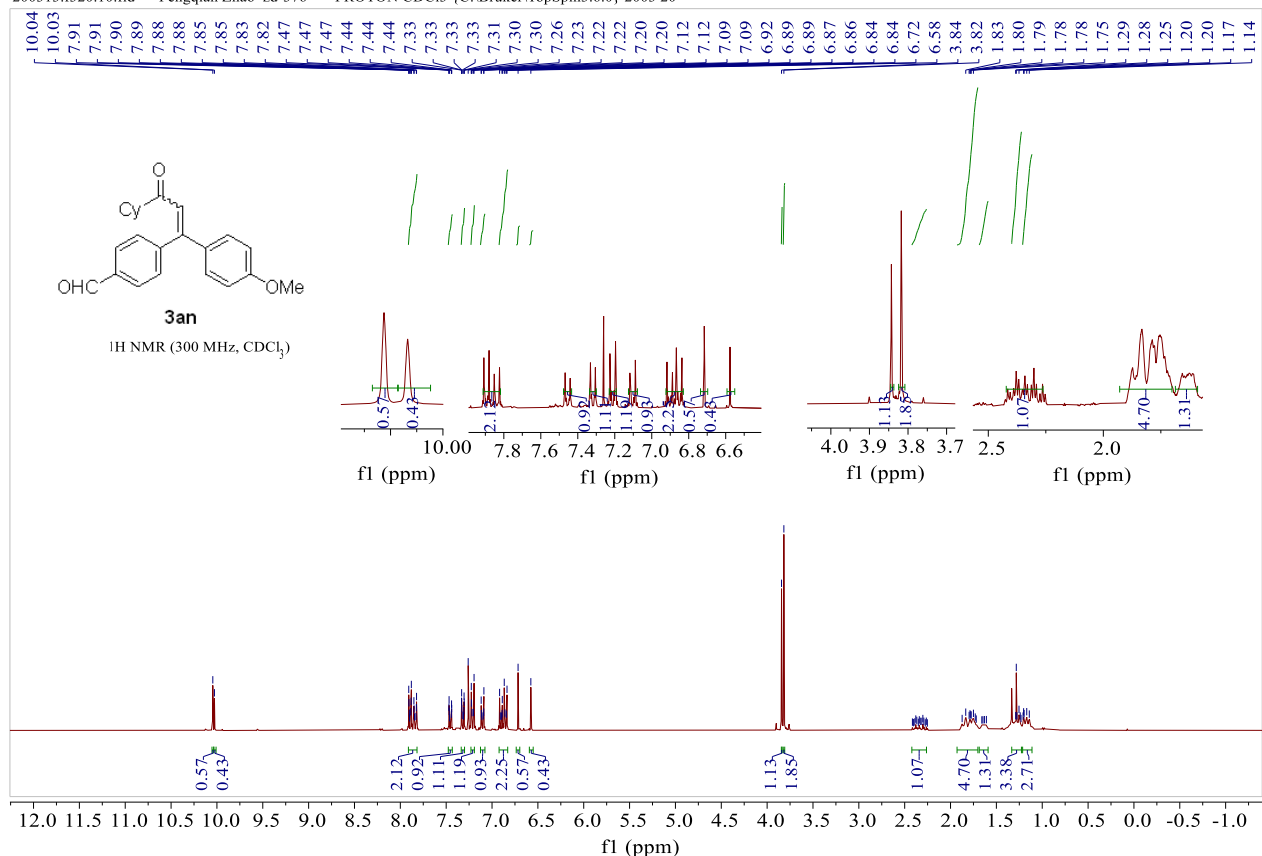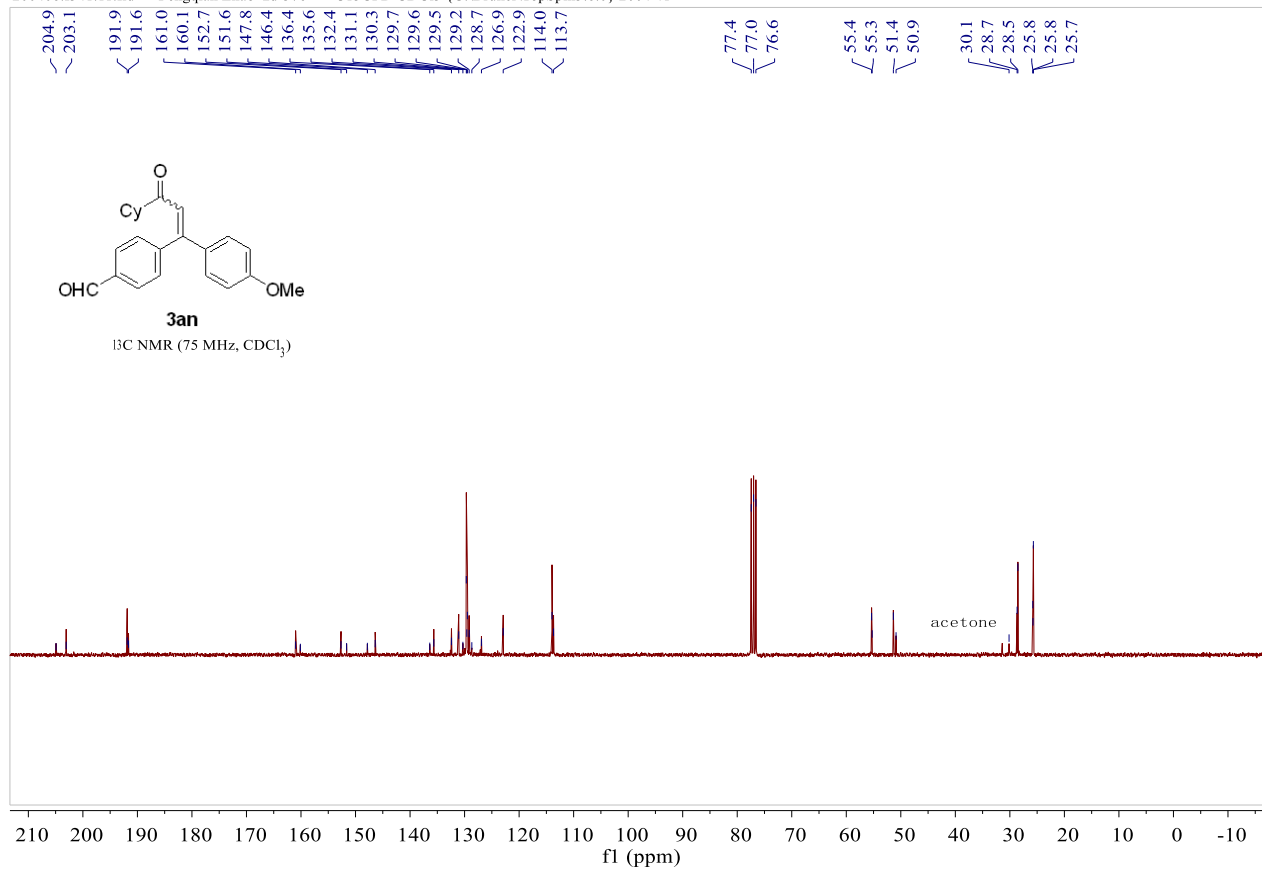

200313.f321.10.fid — Fengqian Zhao zd-377 — PROTON CDC13 {C:\Bruker\TopSpin3.6.0} 2003 21

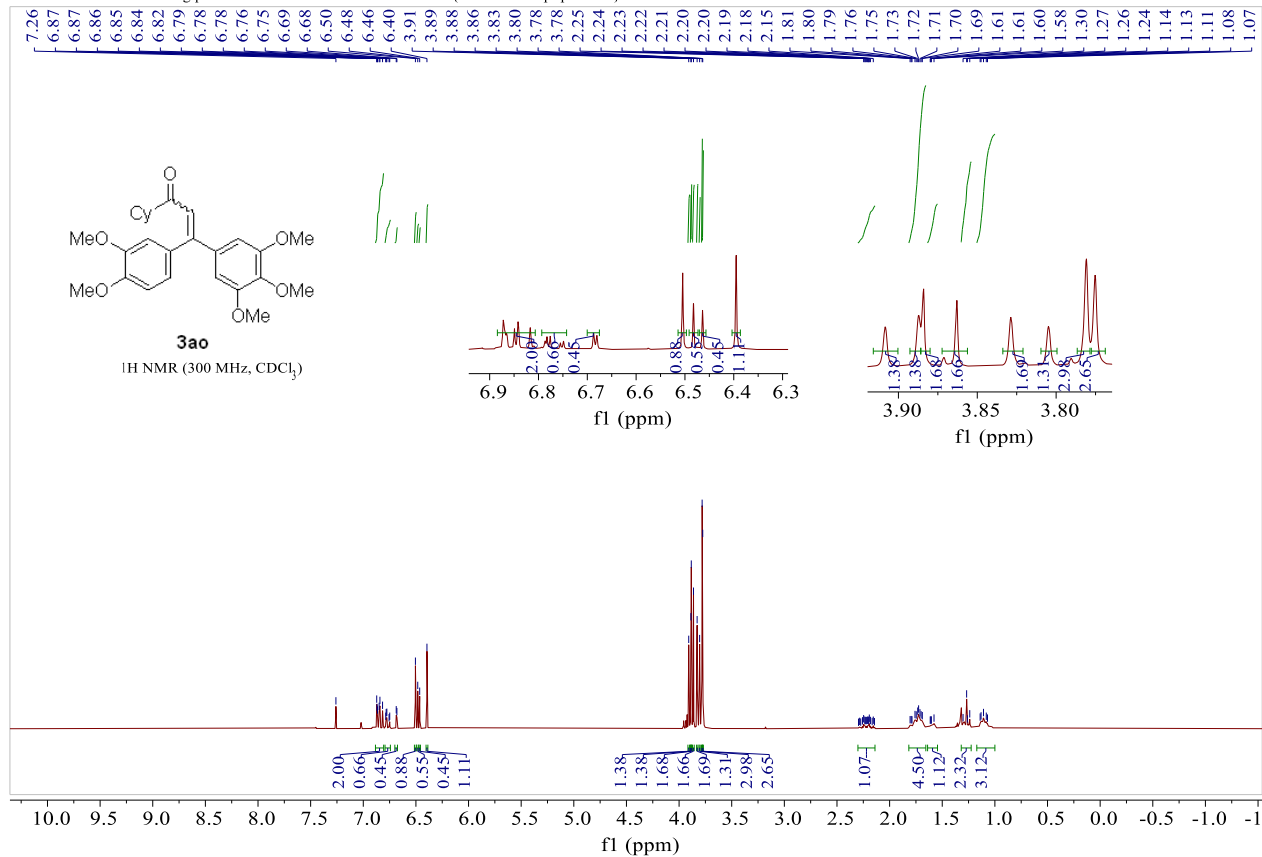

200313.f321.11.fid — Fengqian Zhao zd-377 — C13CPD CDC13 {C:\Bruker\TopSpin3.6.0} 2003 21

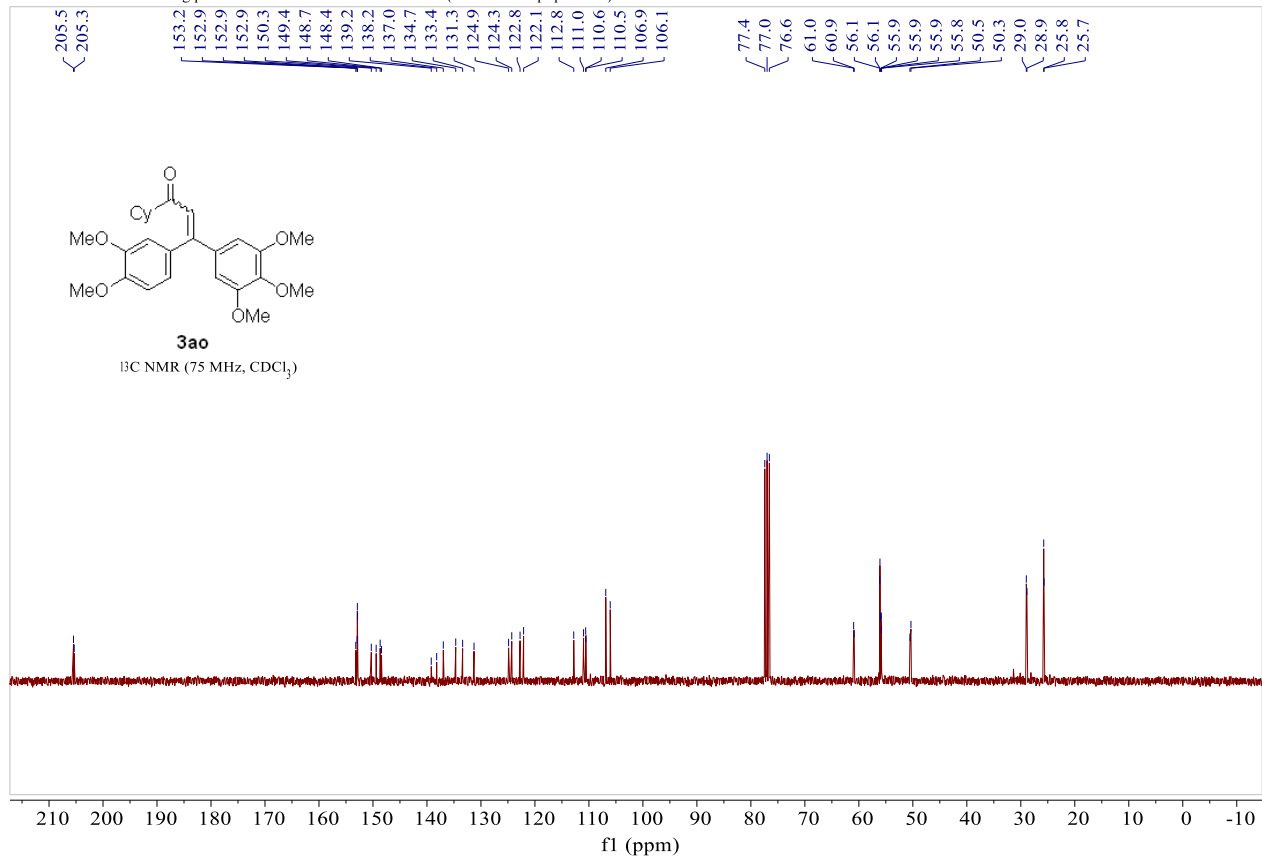

200210.f322.10.fid — Fengqian Zhao zd-324 — PROTON CDCl3 {C:\Bruker\TopSpin3.6.0} 2002 22

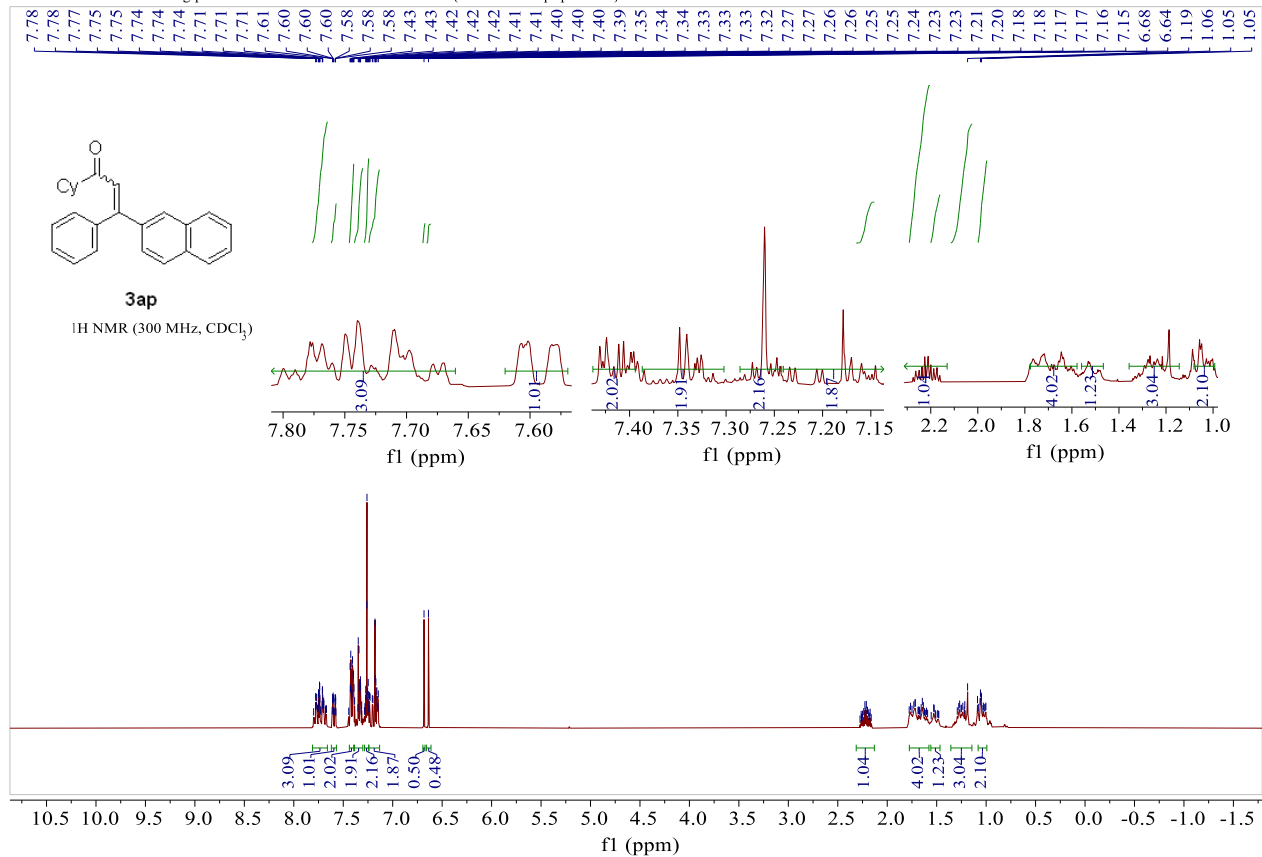

200217.308.10.fid — Fengqian Zhao zd-324 — Au13C CDCl3 {C:\Bruker\TopSpin3.6.0} 2002 8

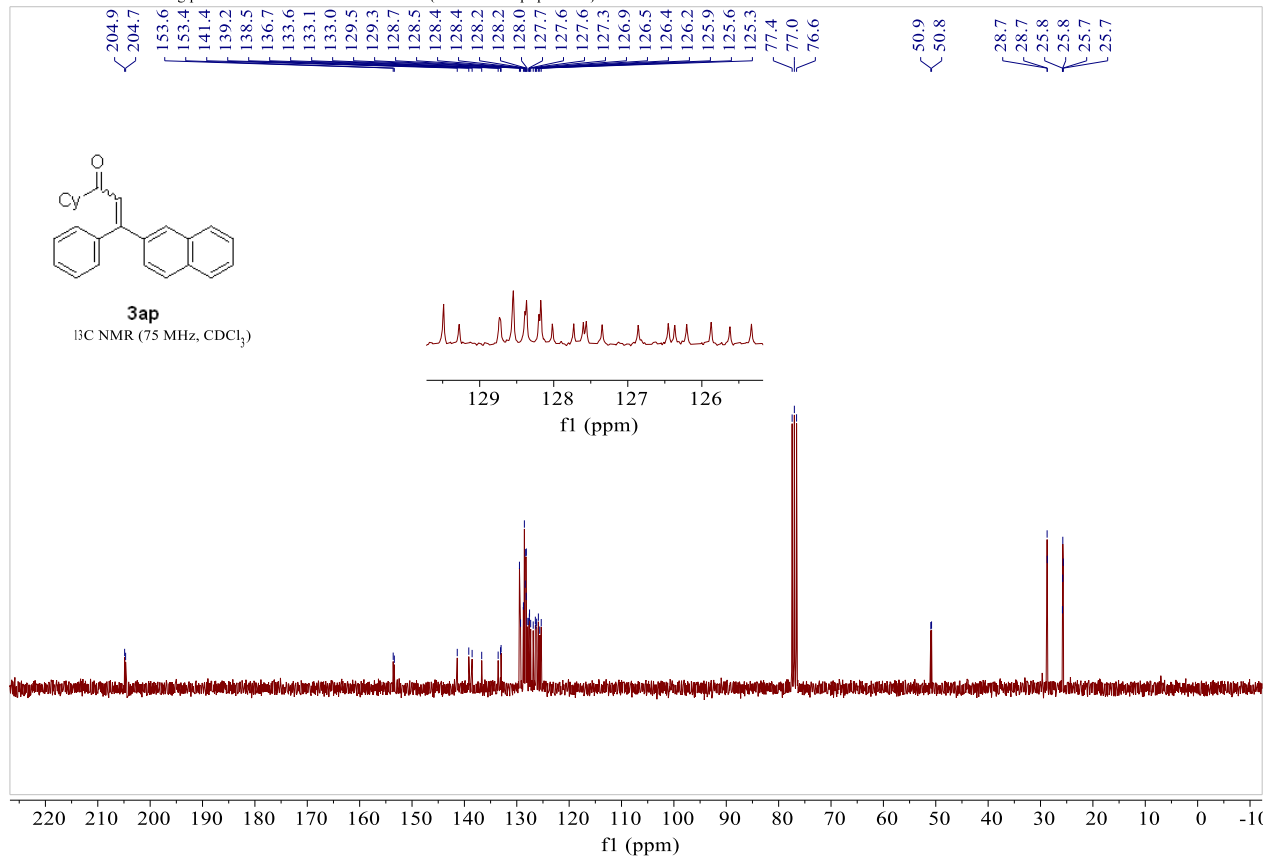

200302.416.10.fid — Fengqian Zhao zd-359 — Au1H CDCl3 {C:\Bruker\TopSpin3.5pl6} 2003 16

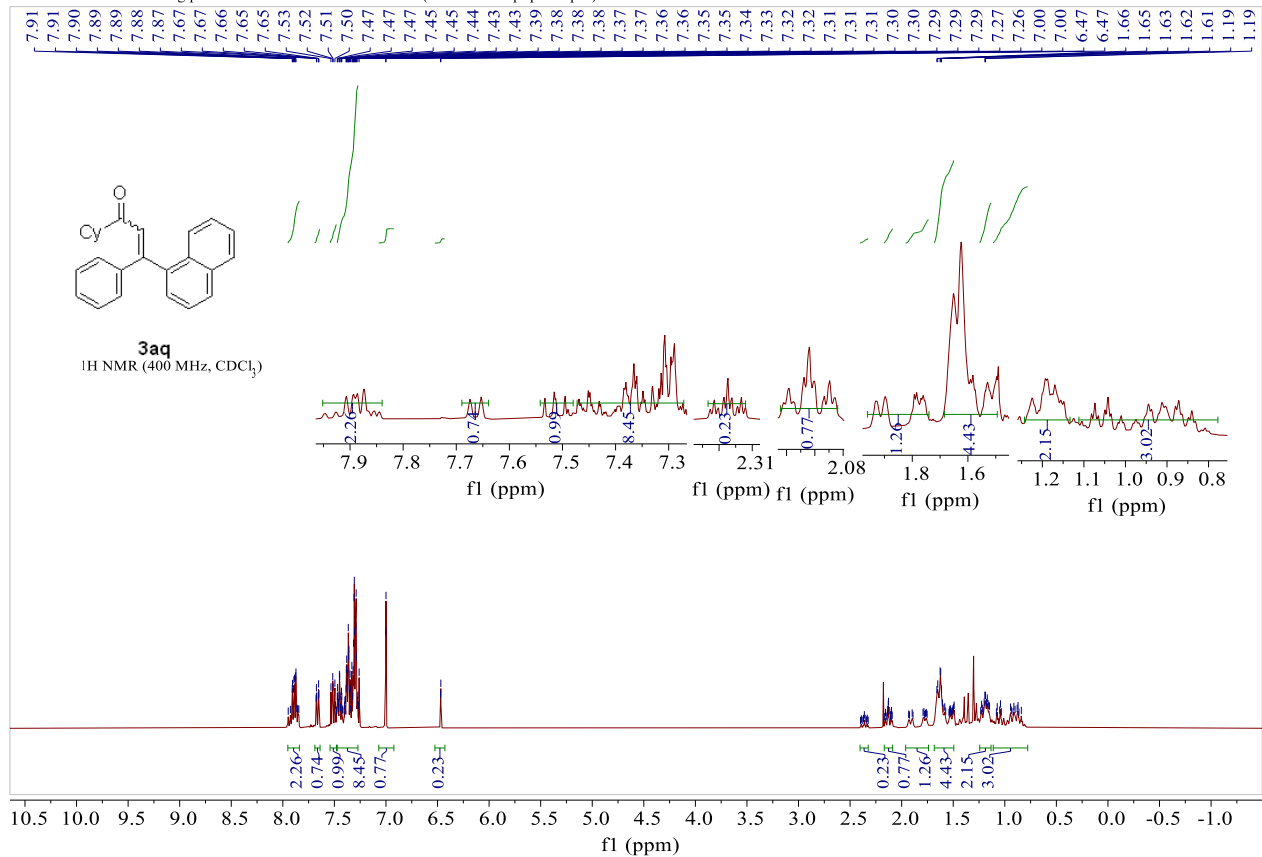

200302.416.11.fid — Fengqian Zhao zd-359 — Au13C CDCl3 {C:\Bruker\TopSpin3.5pl6} 2003 16

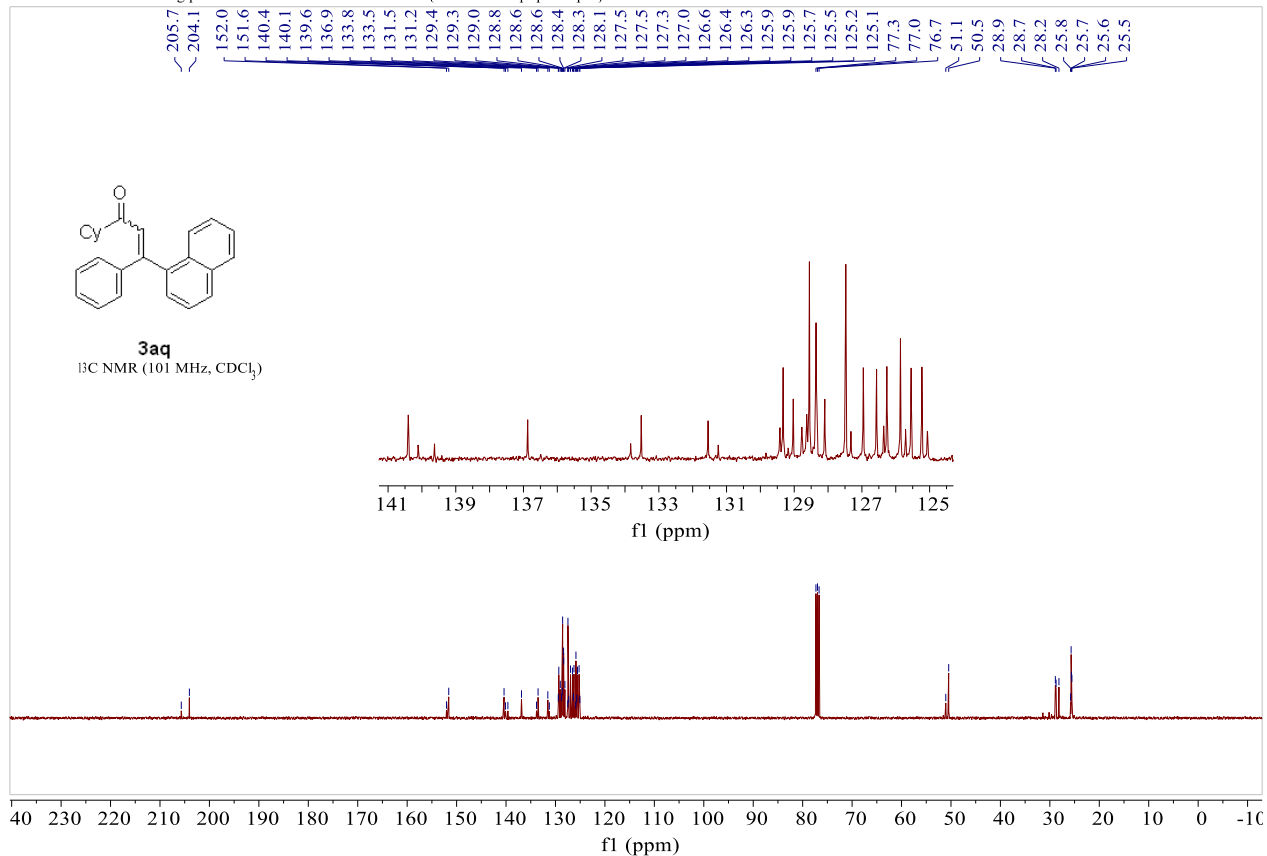

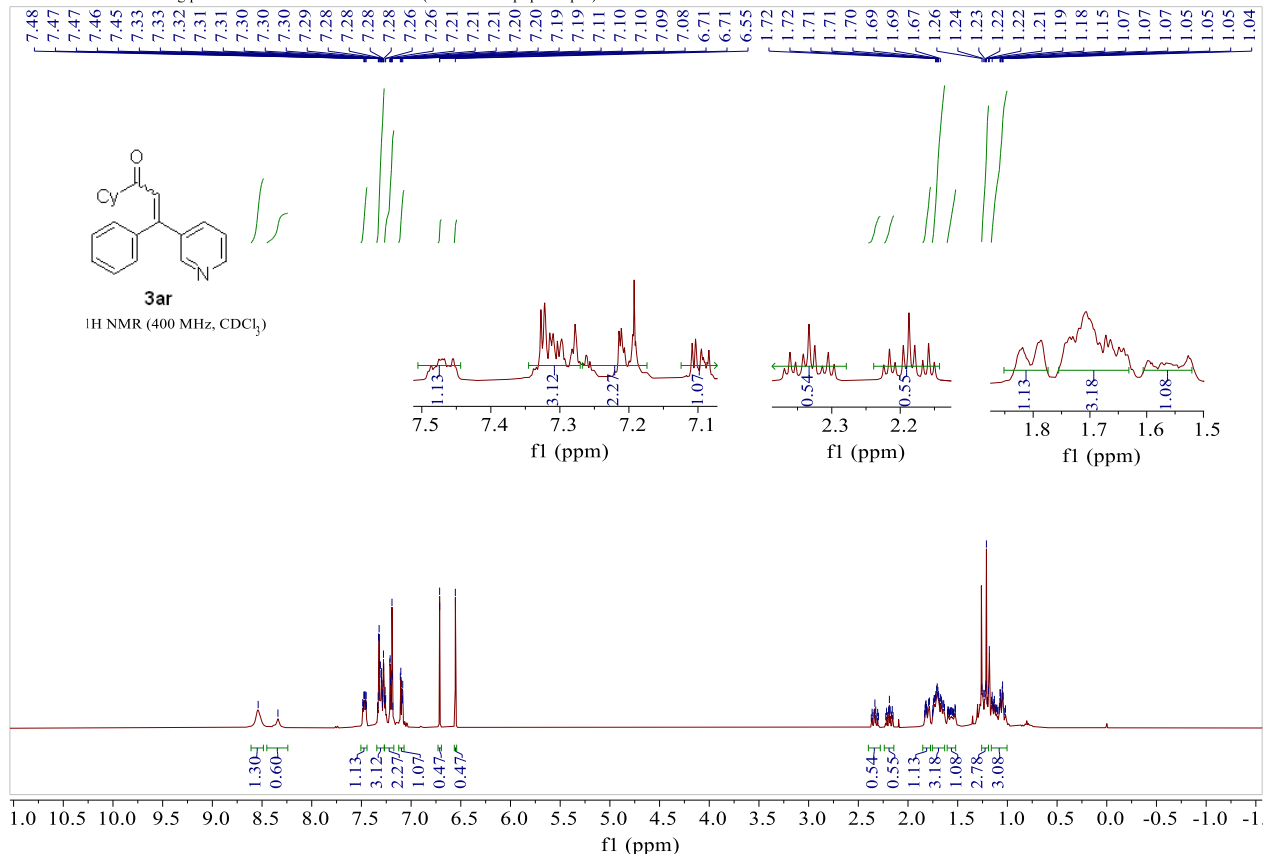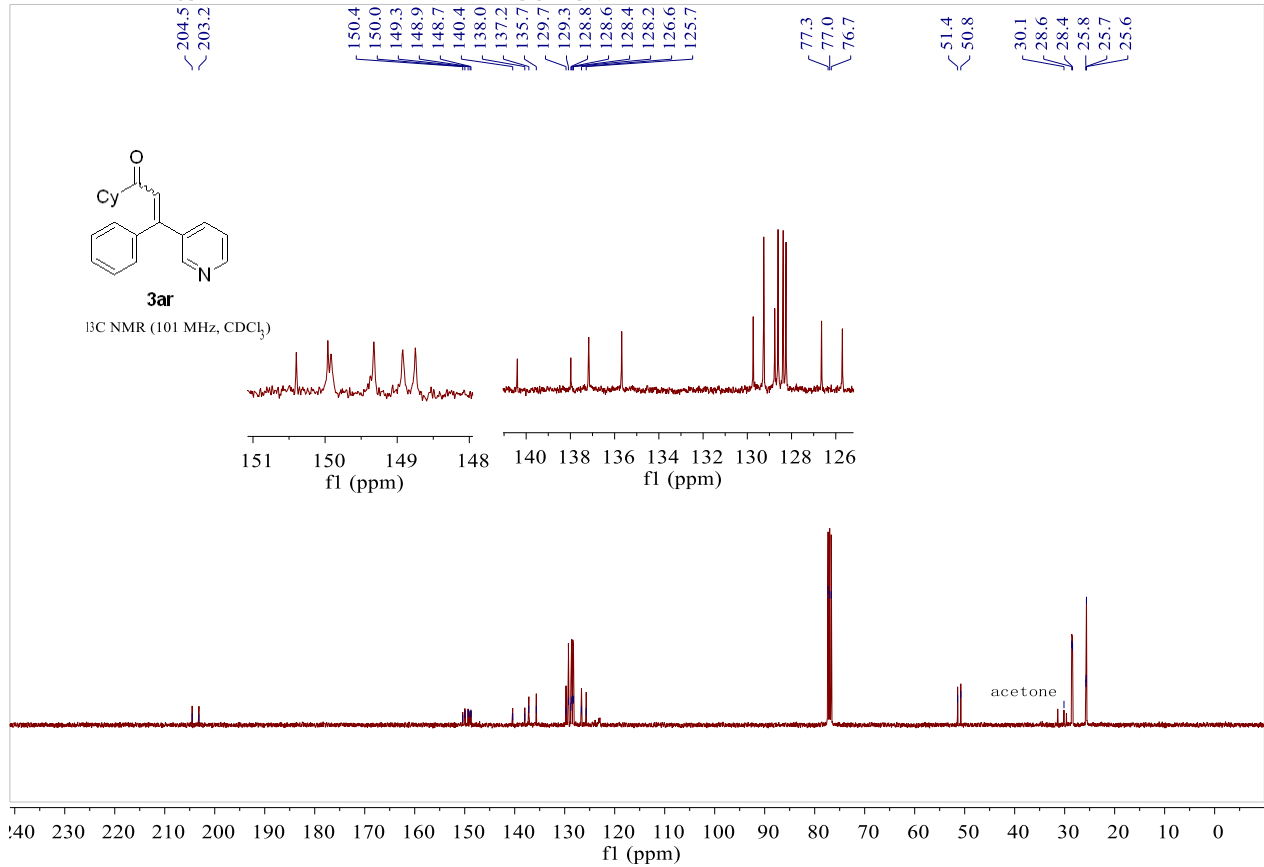

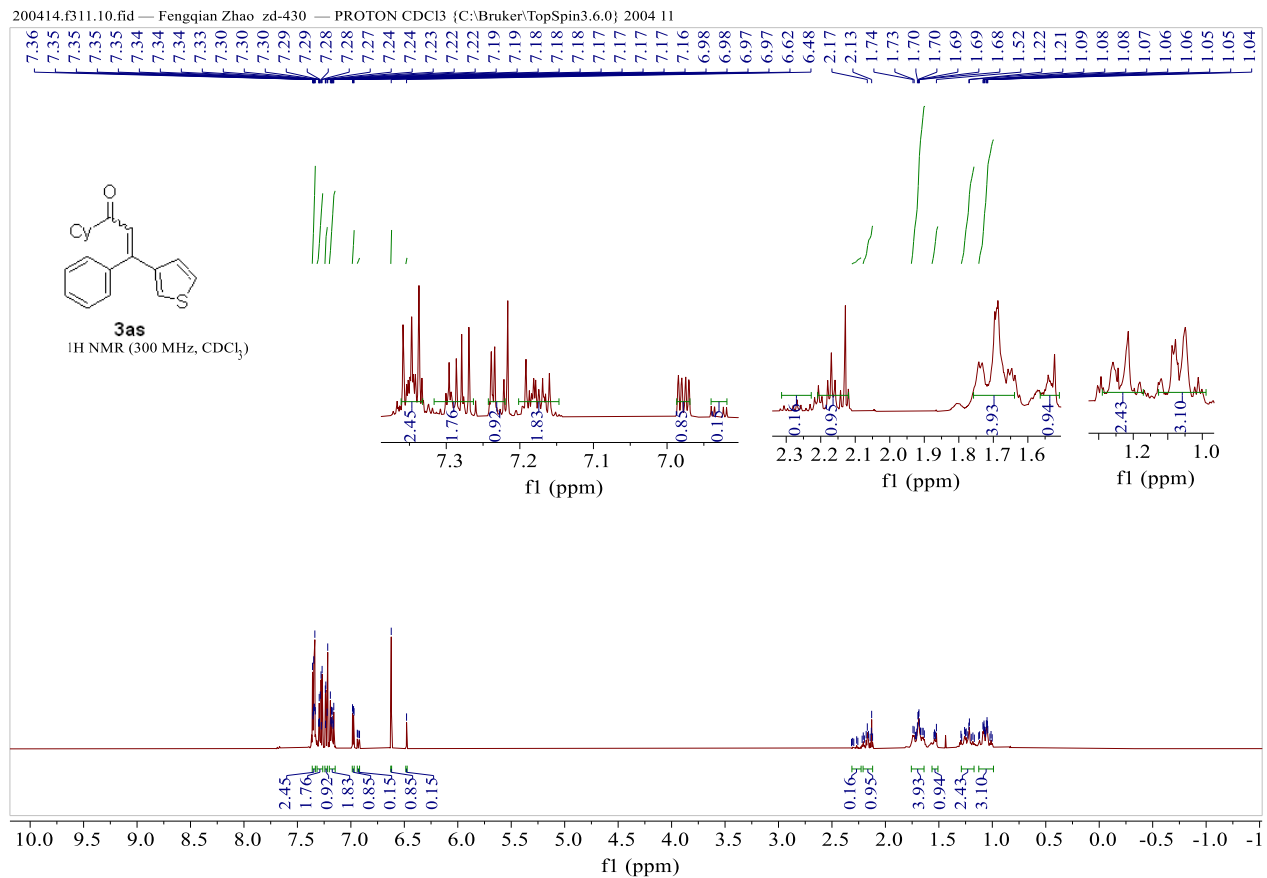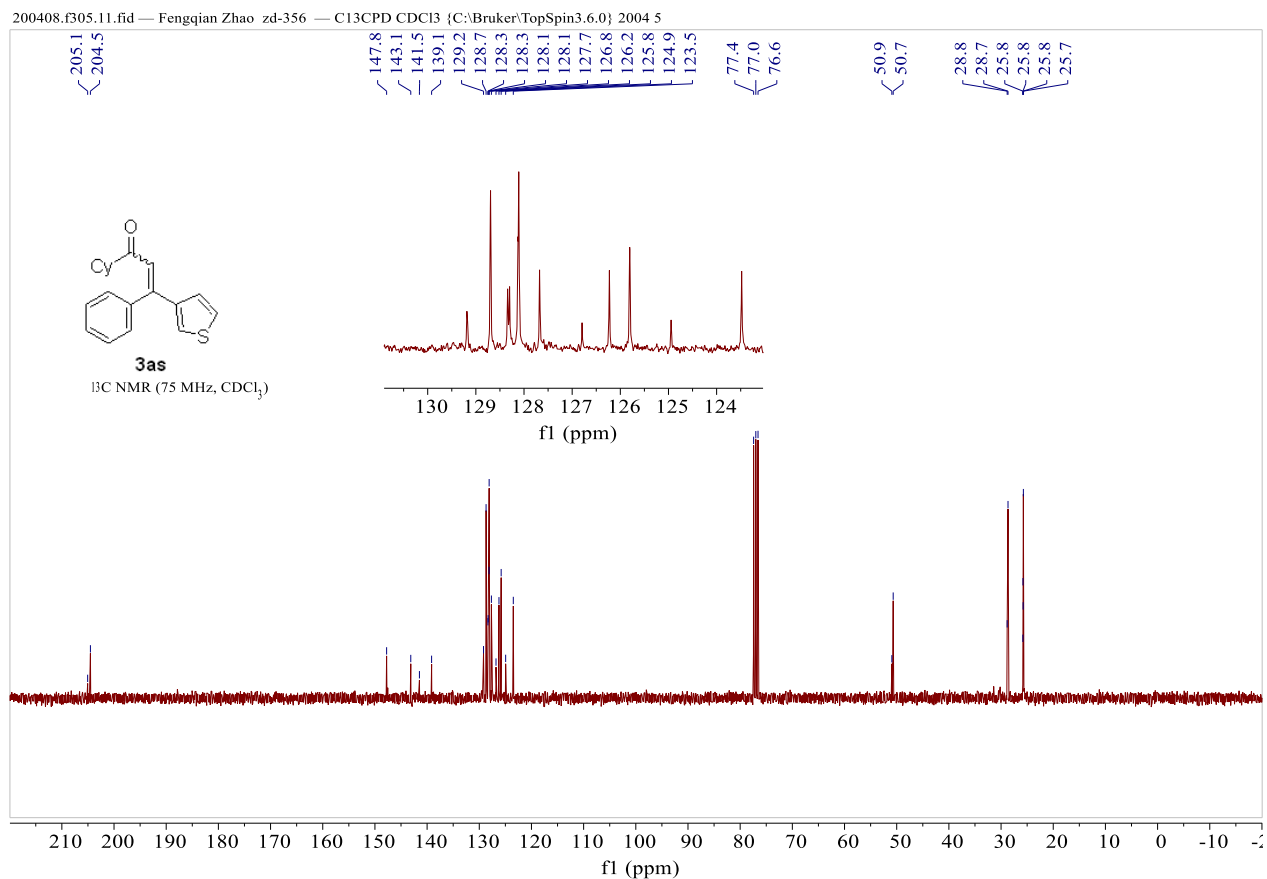



200219.309.10.fid — Fengqian Zhao zd-347 — Au1H CDCl3 {C:\Bruker\TopSpin3.6.0} 2002 9

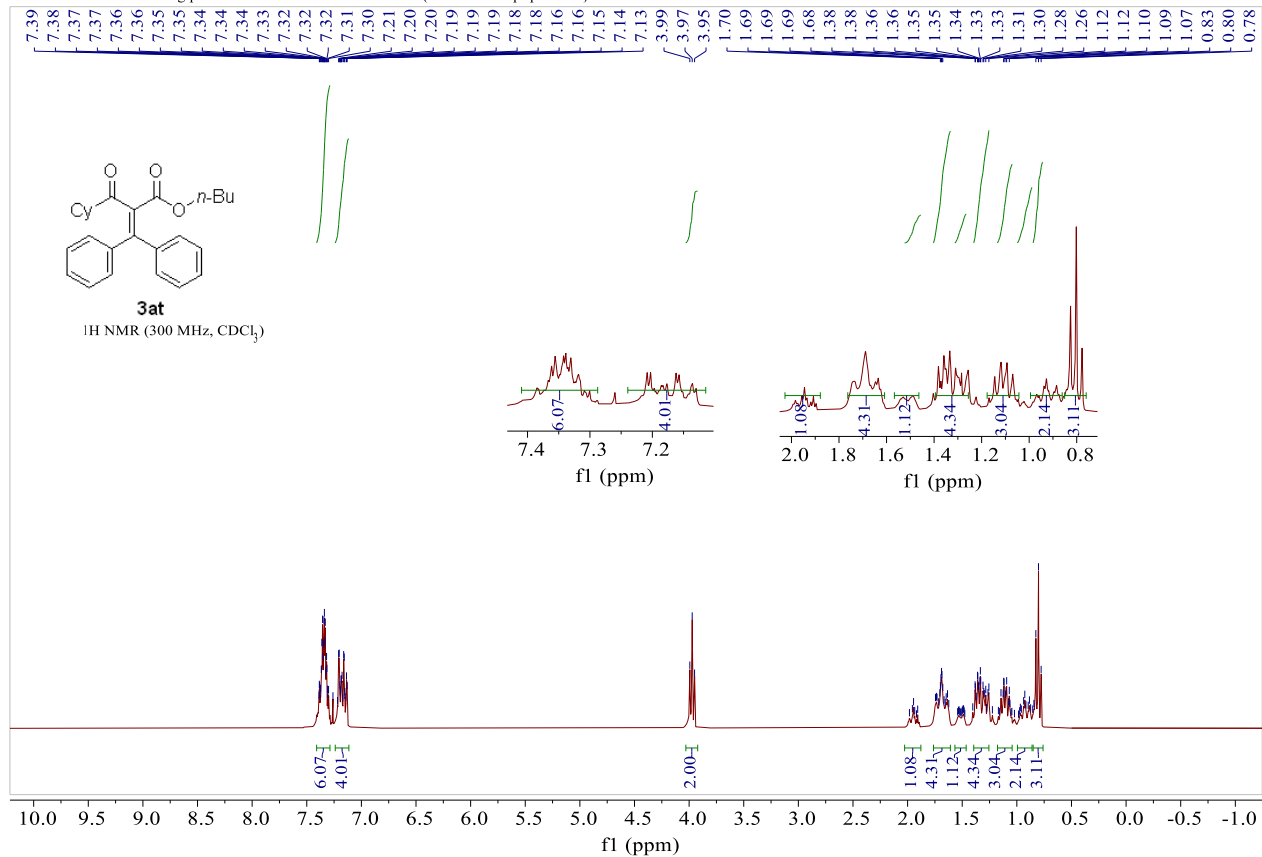

200219.309.11.fid — Fengqian Zhao zd-347 — Au13C CDCl3 {C:\Bruker\TopSpin3.6.0} 2002 9

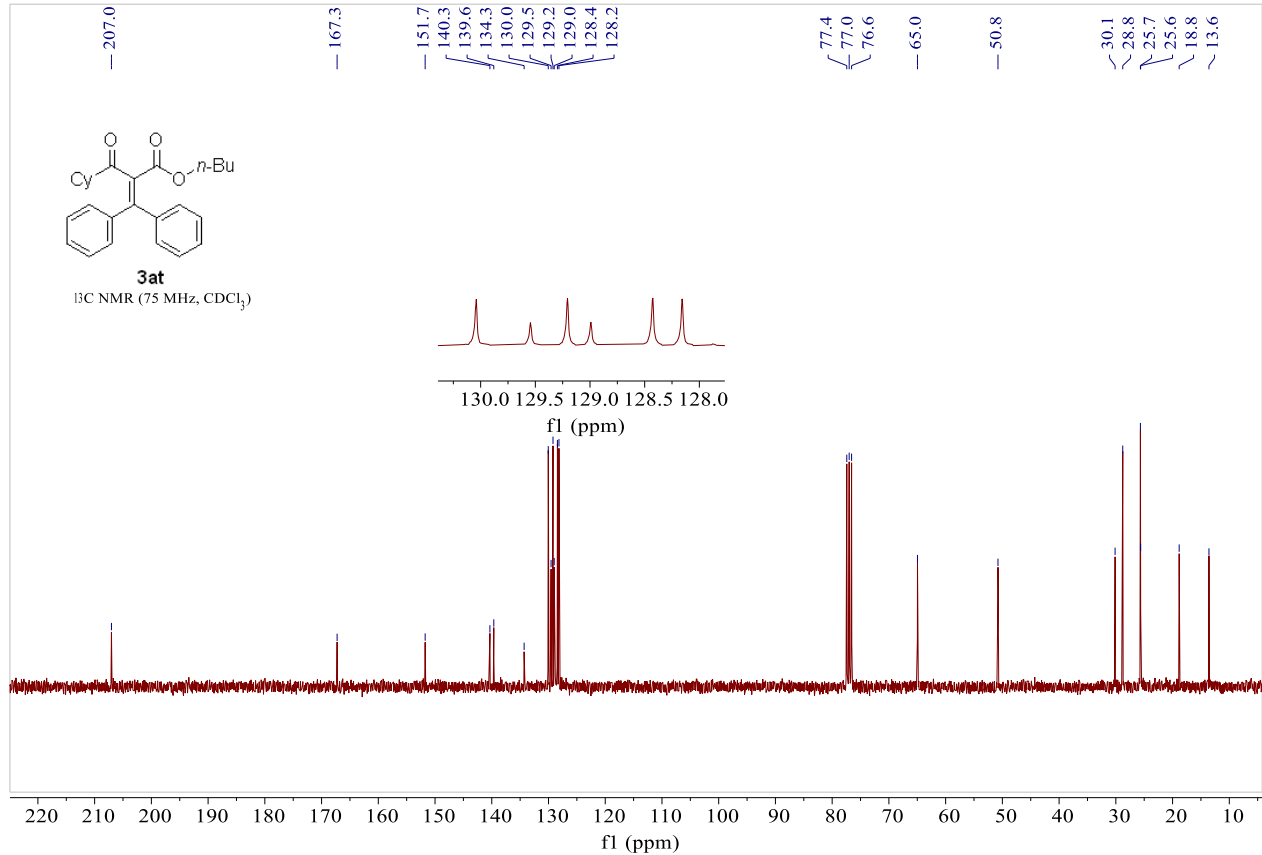

200407.416.10.fid — Fengqian Zhao zd-423 — Au1H CDCl3 {C:\Bruker\TopSpin3.5pl6} 2004 16

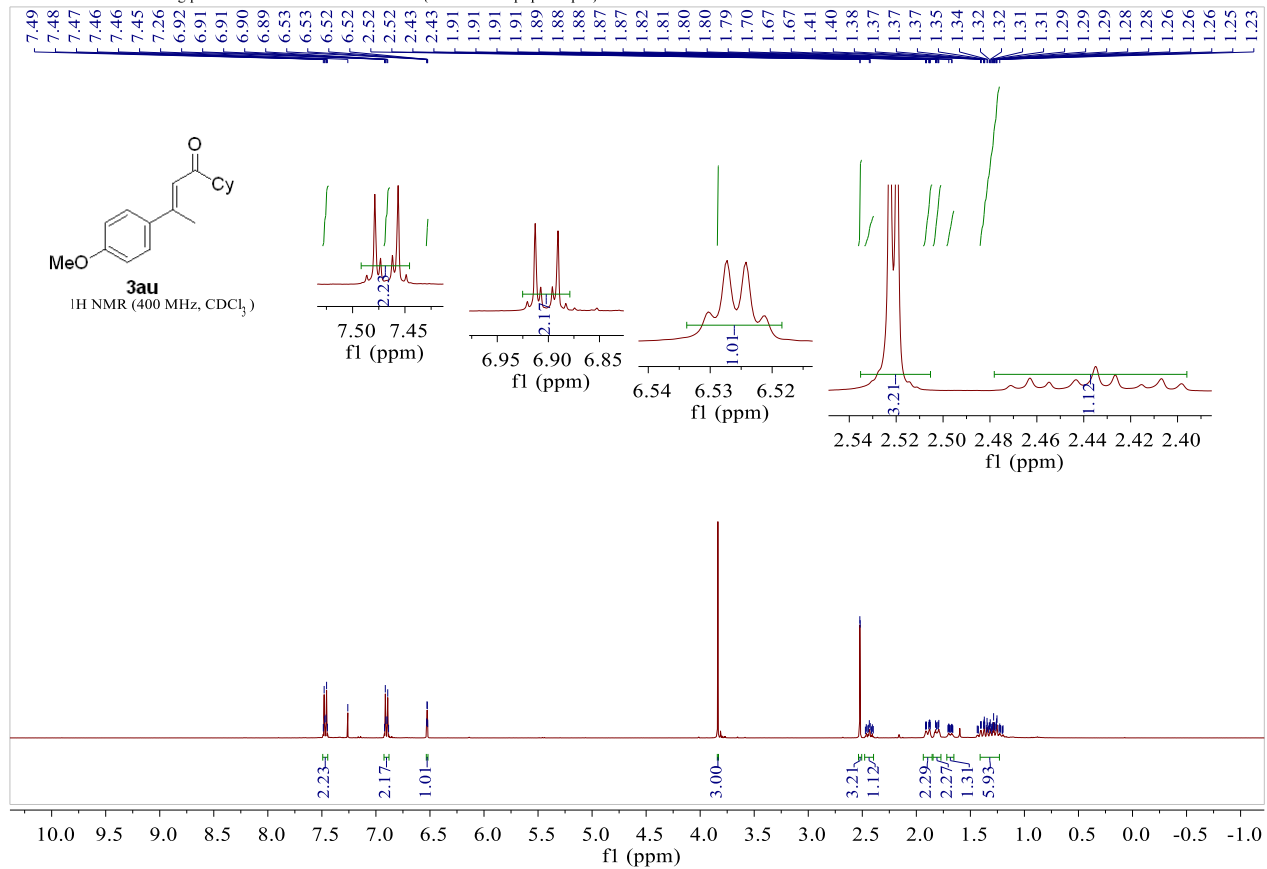

200407.416.11.fid — Fengqian Zhao zd-423 — Au13C CDCl3 {C:\Bruker\TopSpin3.5pl6} 2004 16

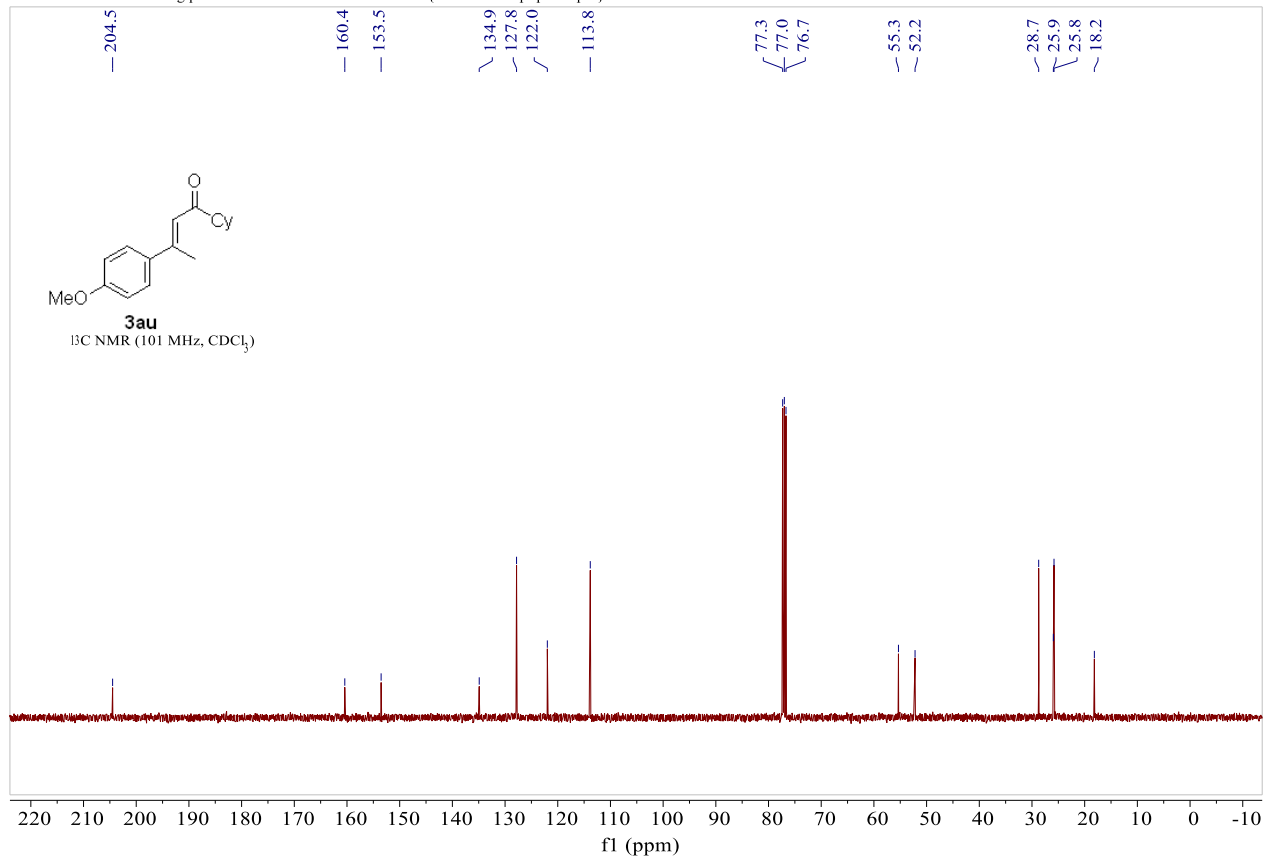

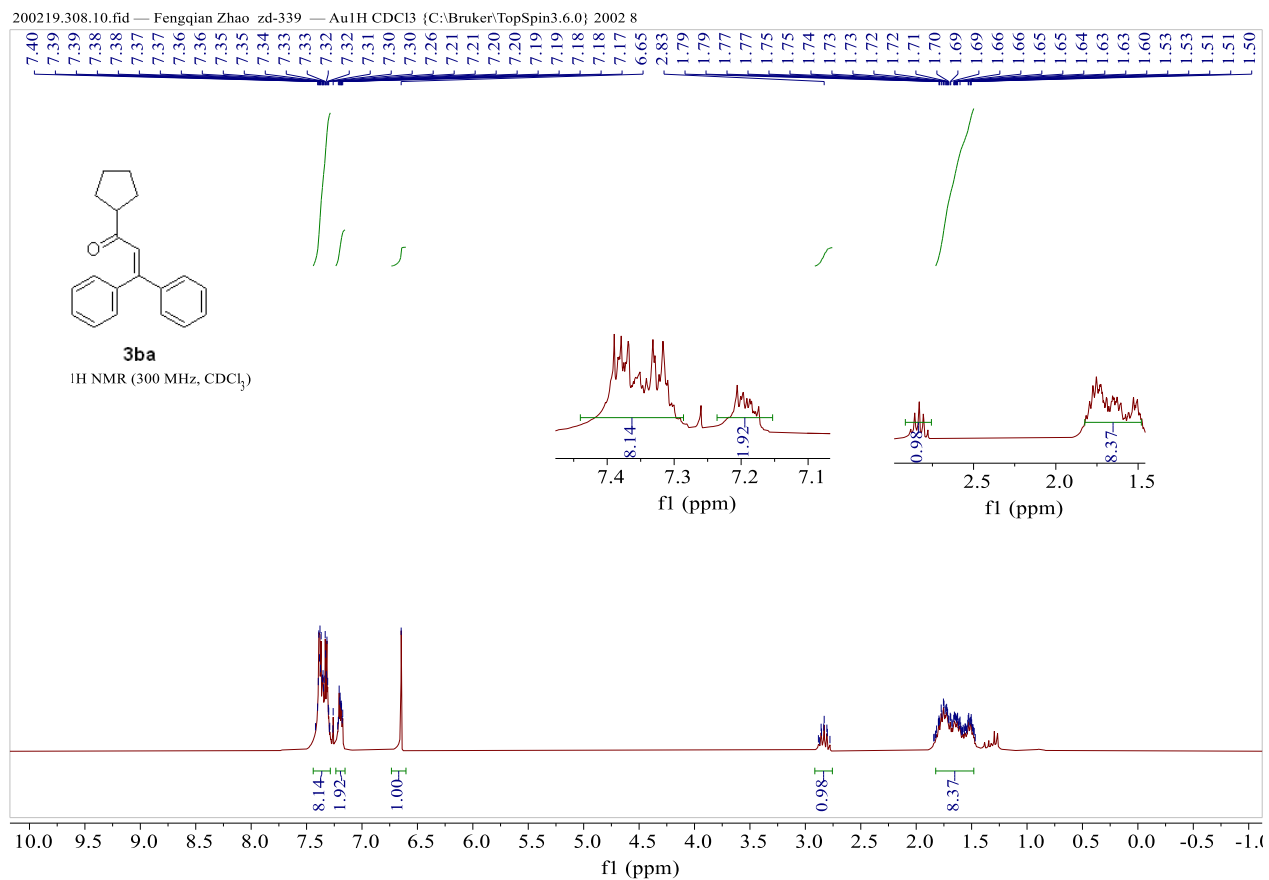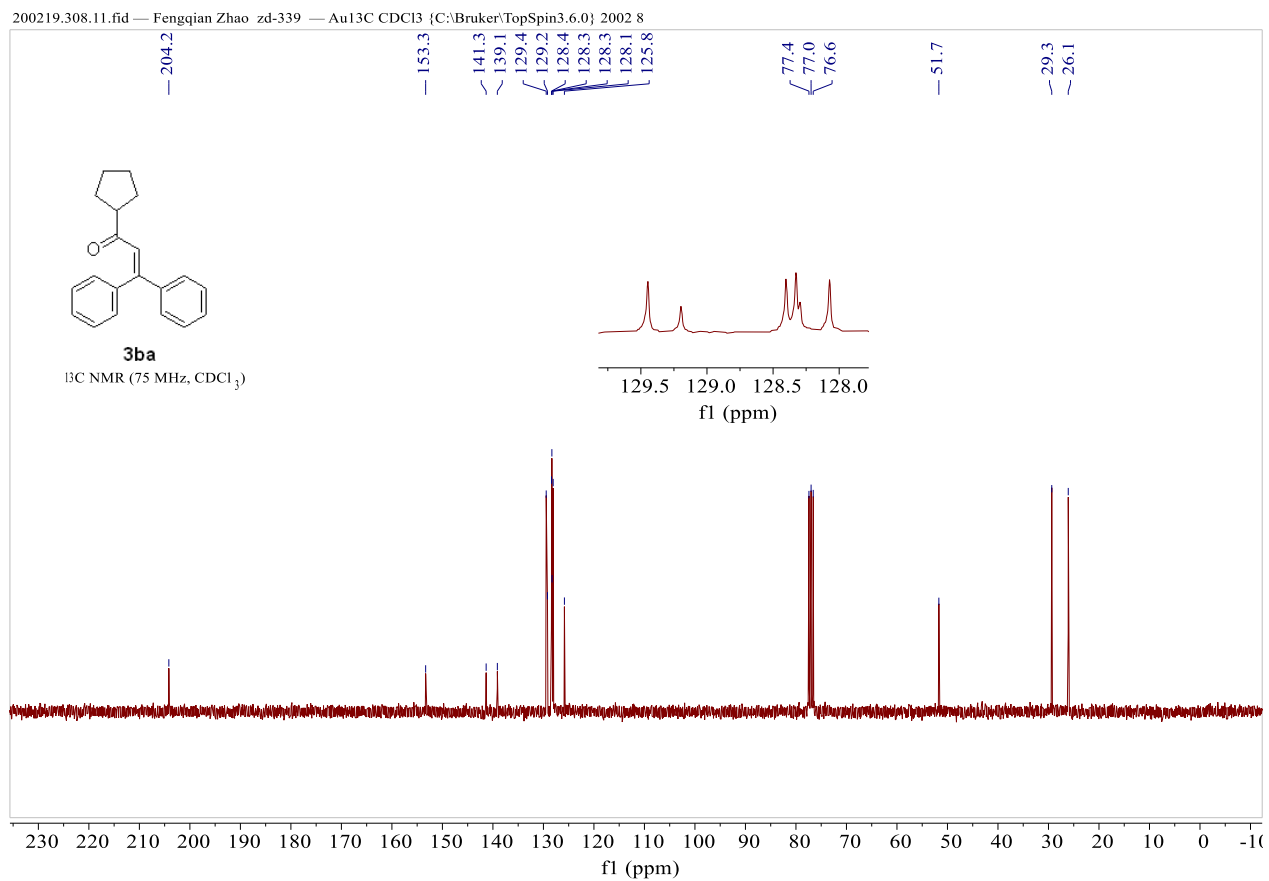

200407.414.10.fid — Fengqian Zhao zd-418 — Au1H CDCl3 {C:\Bruker\TopSpin3.5pl6} 2004 14

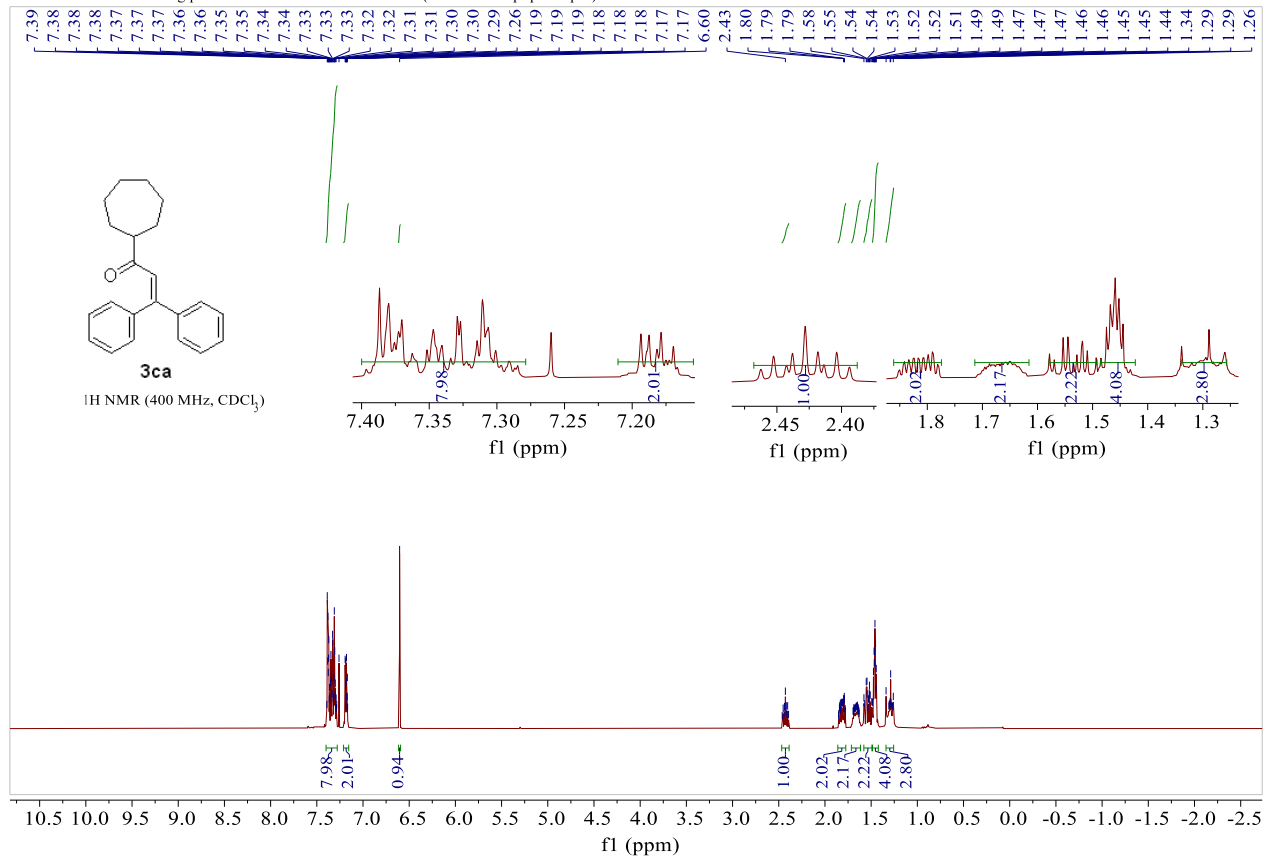

200407.414.11.fid — Fengqian Zhao zd-418 — Au13C CDCl3 {C:\Bruker\TopSpin3.5pl6} 2004 14

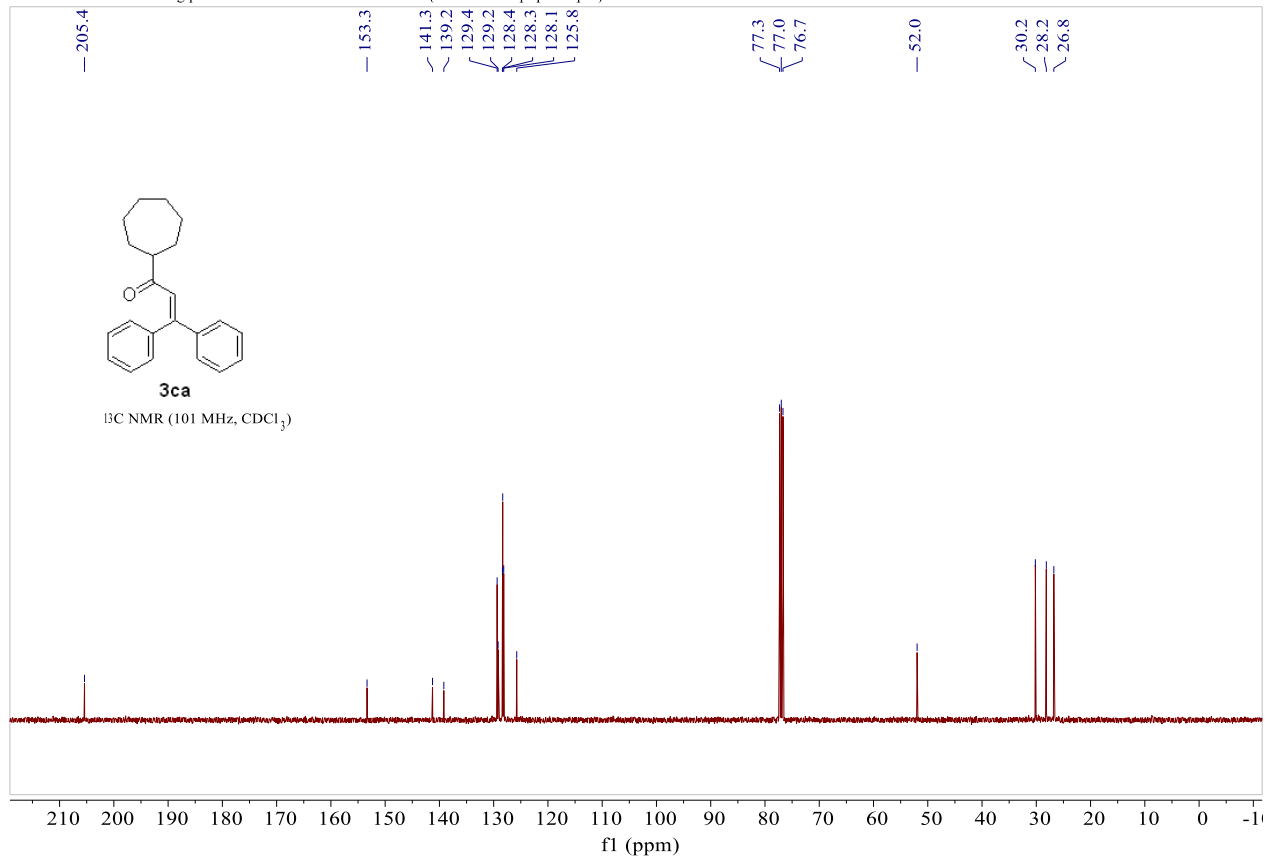

200219.307.10.fid — Fengqian Zhao zd-338 — Au1H CDCl3 {C:\Bruker\TopSpin3.6.0} 2002 7

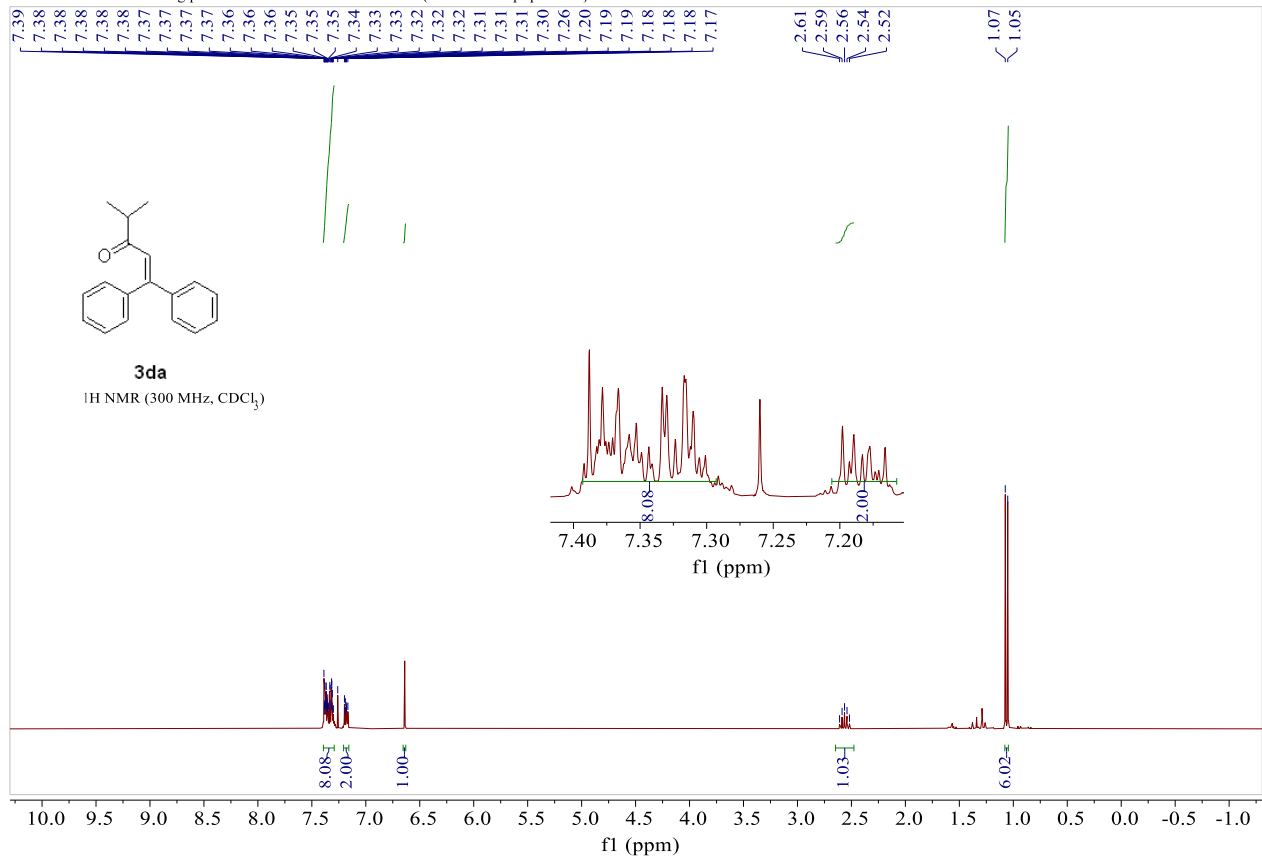

200219.307.11.fid — Fengqian Zhao zd-338 — Au13C CDCl3 {C:\Bruker\TopSpin3.6.0} 2002 7

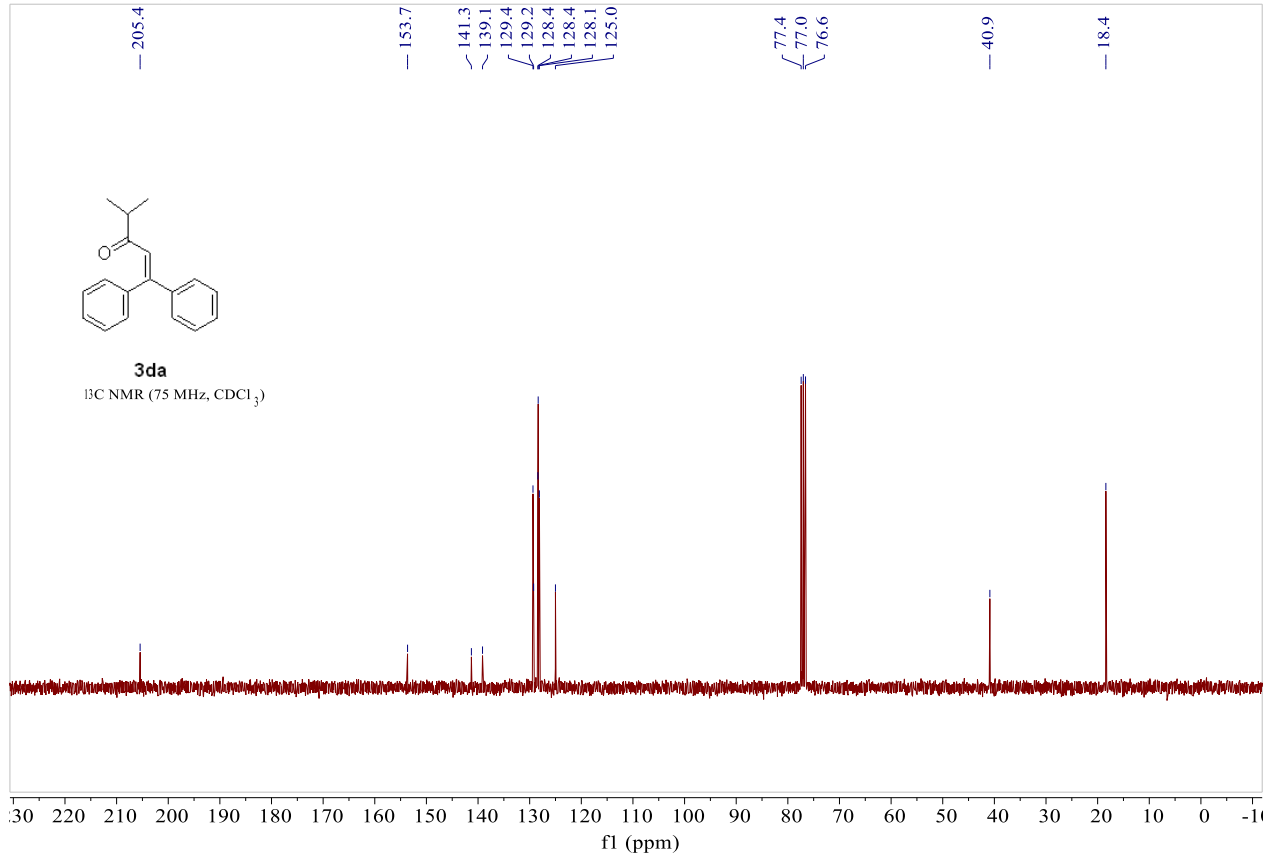

200409.406.10.fid — Fengqian Zhao zd-361 — Au1H CDCl3 {C:\Bruker\TopSpin3.5pl6} 2004 6

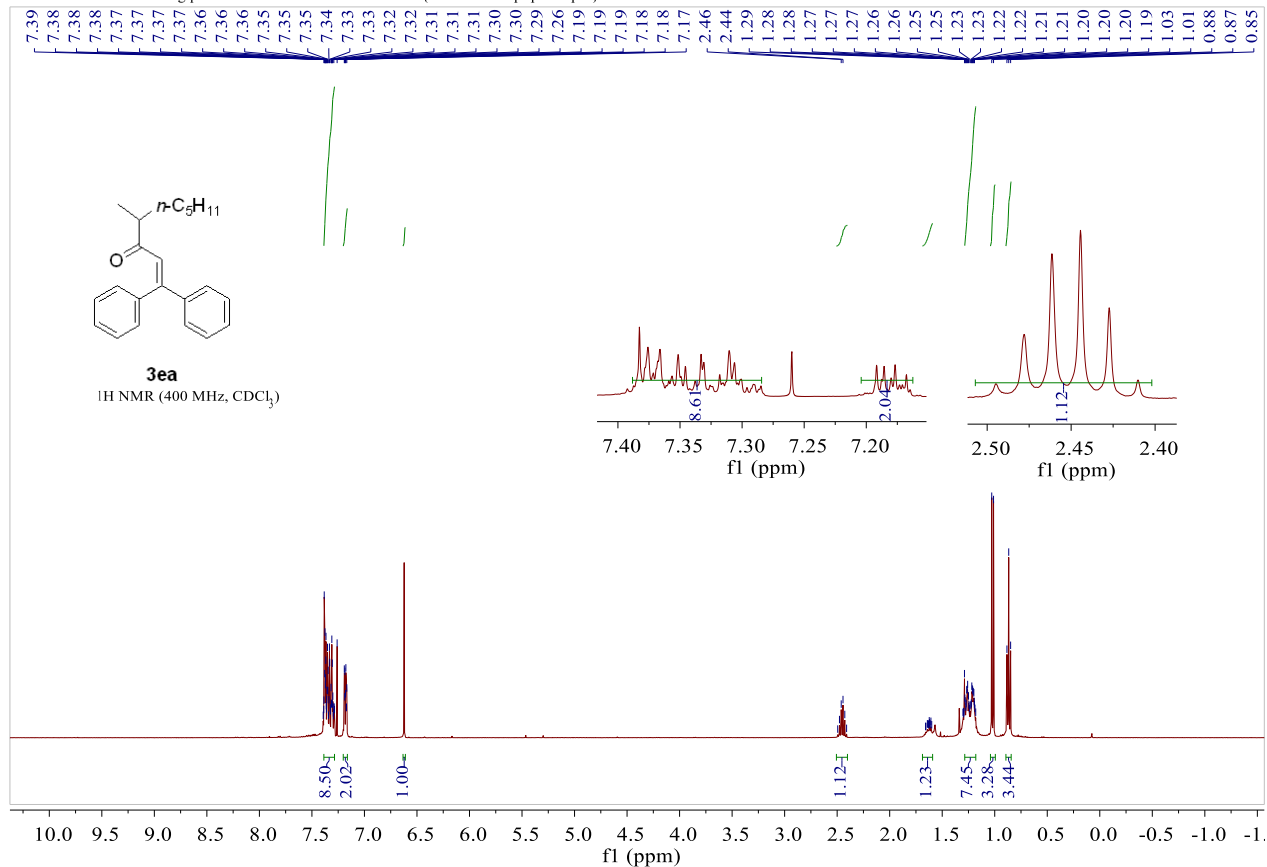

200303.426.11.fid — Zhao/ zd-361 — Au13C CDCl3 {C:\Bruker\TopSpin3.5pl6} 2003 26

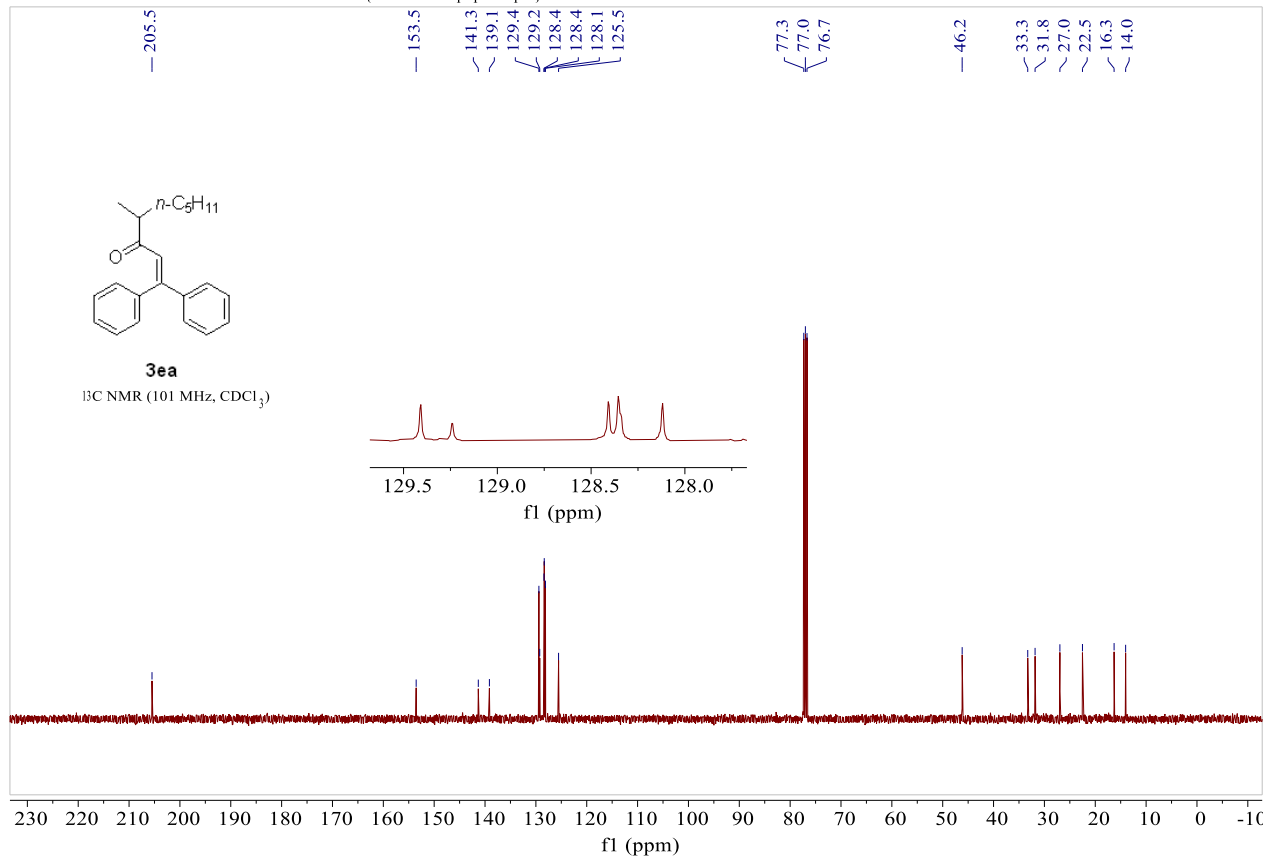

200324.f312.10.fid — Fengqian Zhao / zd-401 — PROTON CDCl<sub>3</sub> {C:\Bruker\TopSpin3.6.0} 2003 12

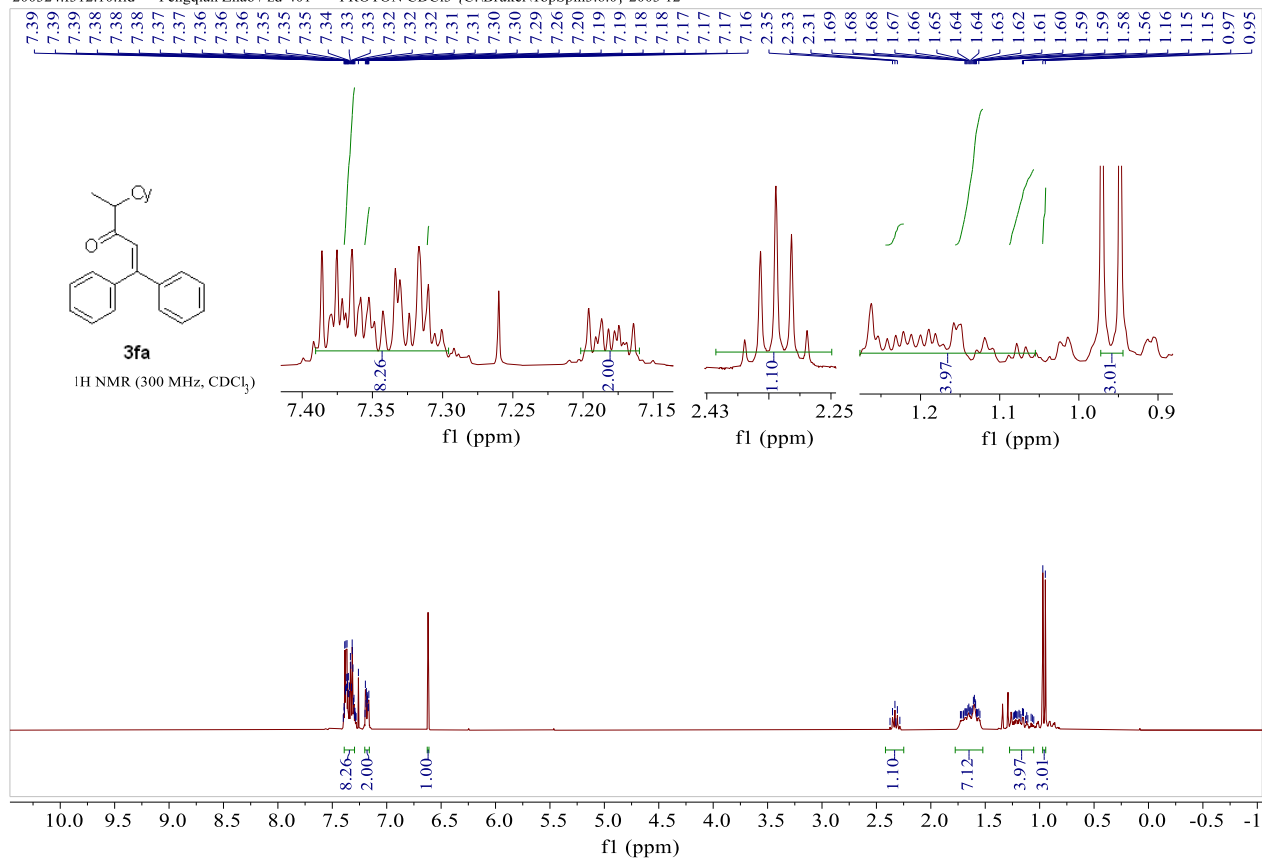

200324.f312.11.fid — Fengqian Zhao / zd-401 — C13CPD CDCl<sub>3</sub> {C:\Bruker\TopSpin3.6.0} 2003 12

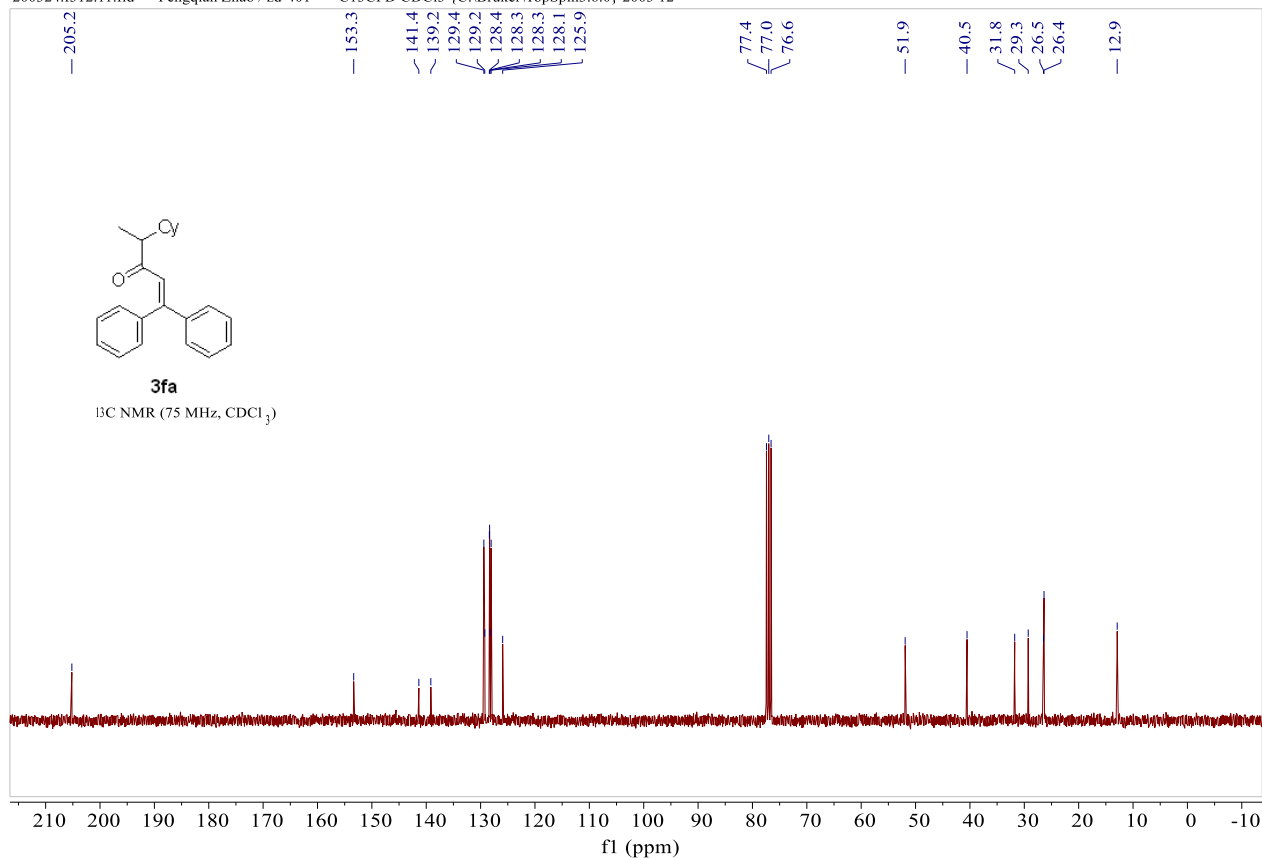

200324.f313.10.fid — Fengqian Zhao / zd-402 — PROTON CDCl3 {C:\Bruker\TopSpin3.6.0} 2003 13

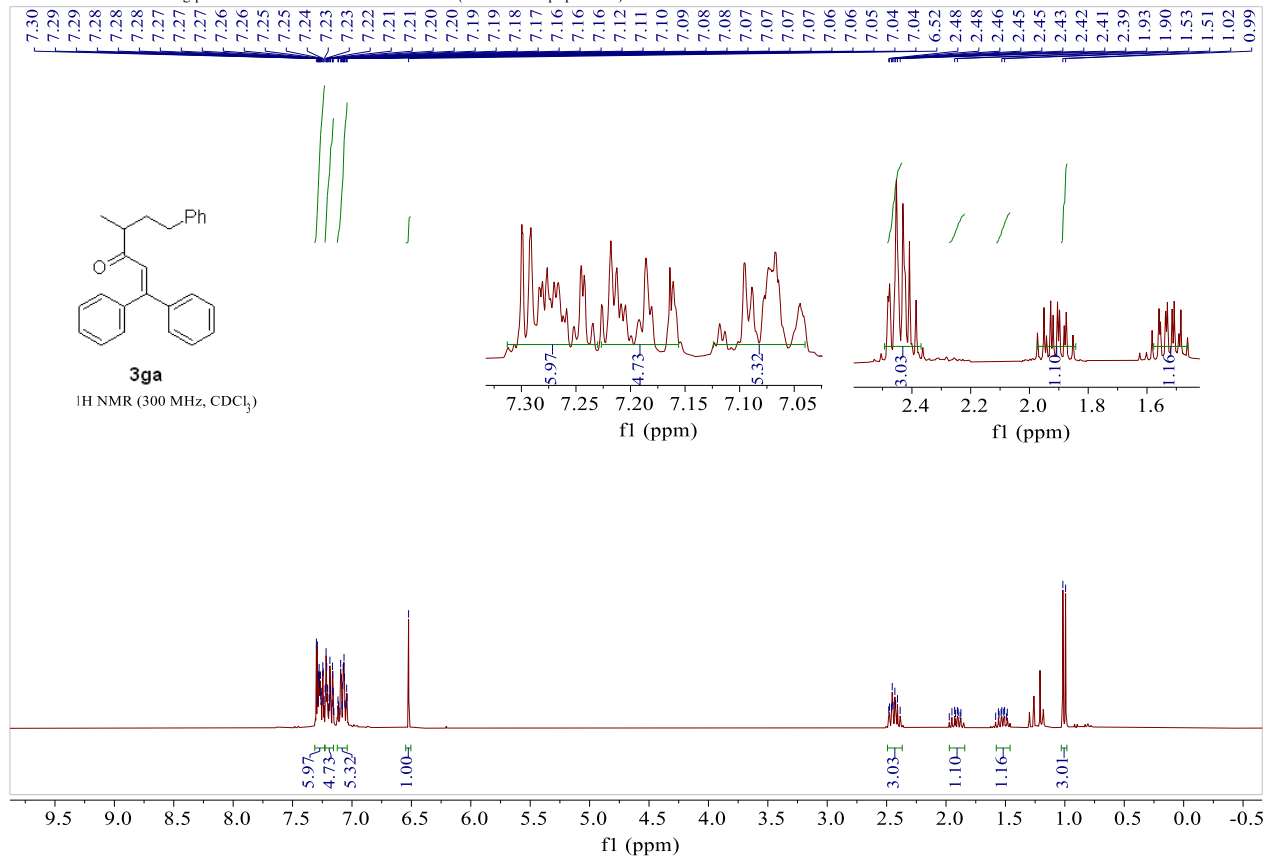

200324.f313.11.fid — Fengqian Zhao / zd-402 — C13CPD CDCl3 {C:\Bruker\TopSpin3.6.0} 2003 13

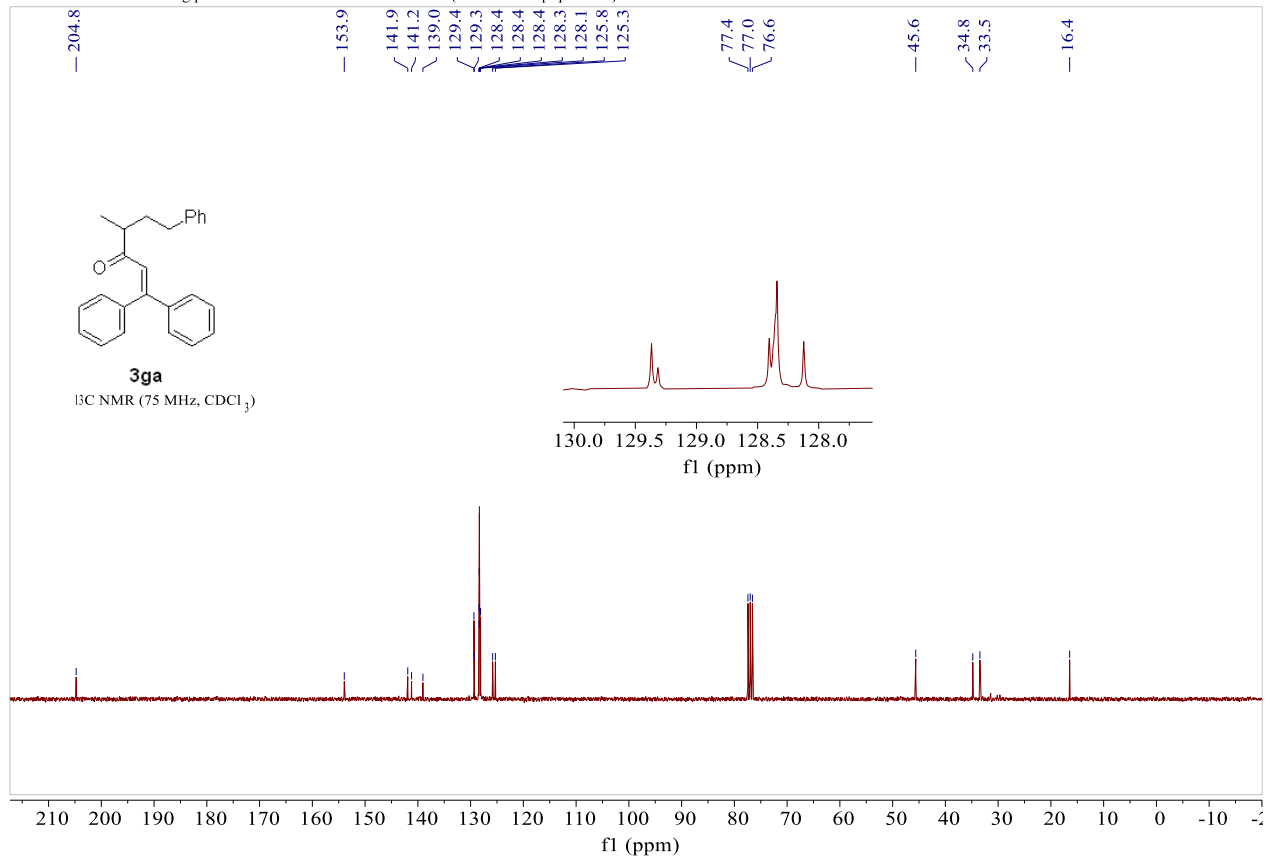



200407.413.10.fid — Fengqian Zhao zd-417 — Au1H CDCl3 {C:\Bruker\TopSpin3.5pl6} 2004 13

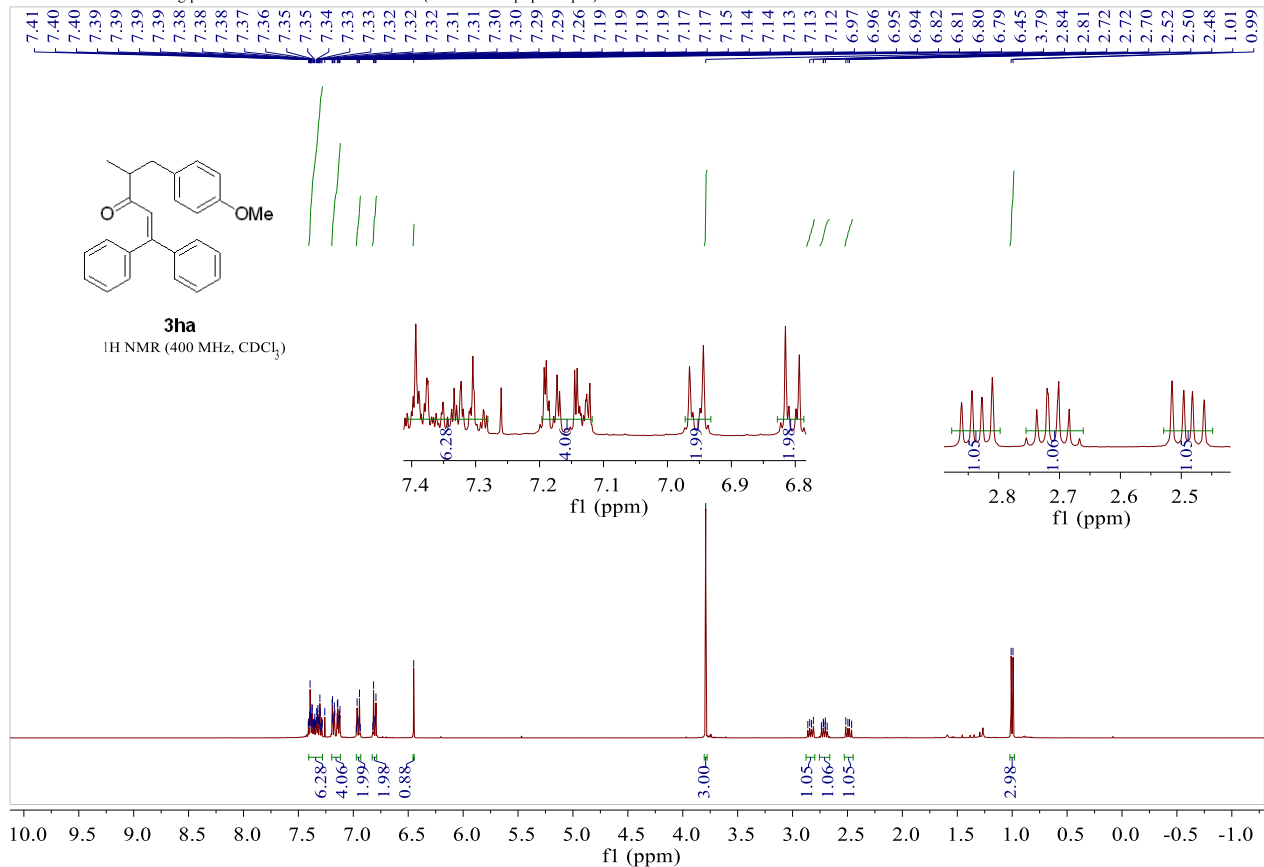

200407.413.11.fid — Fengqian Zhao zd-417 — Au13C CDCl3 {C:\Bruker\TopSpin3.5pl6} 2004 13

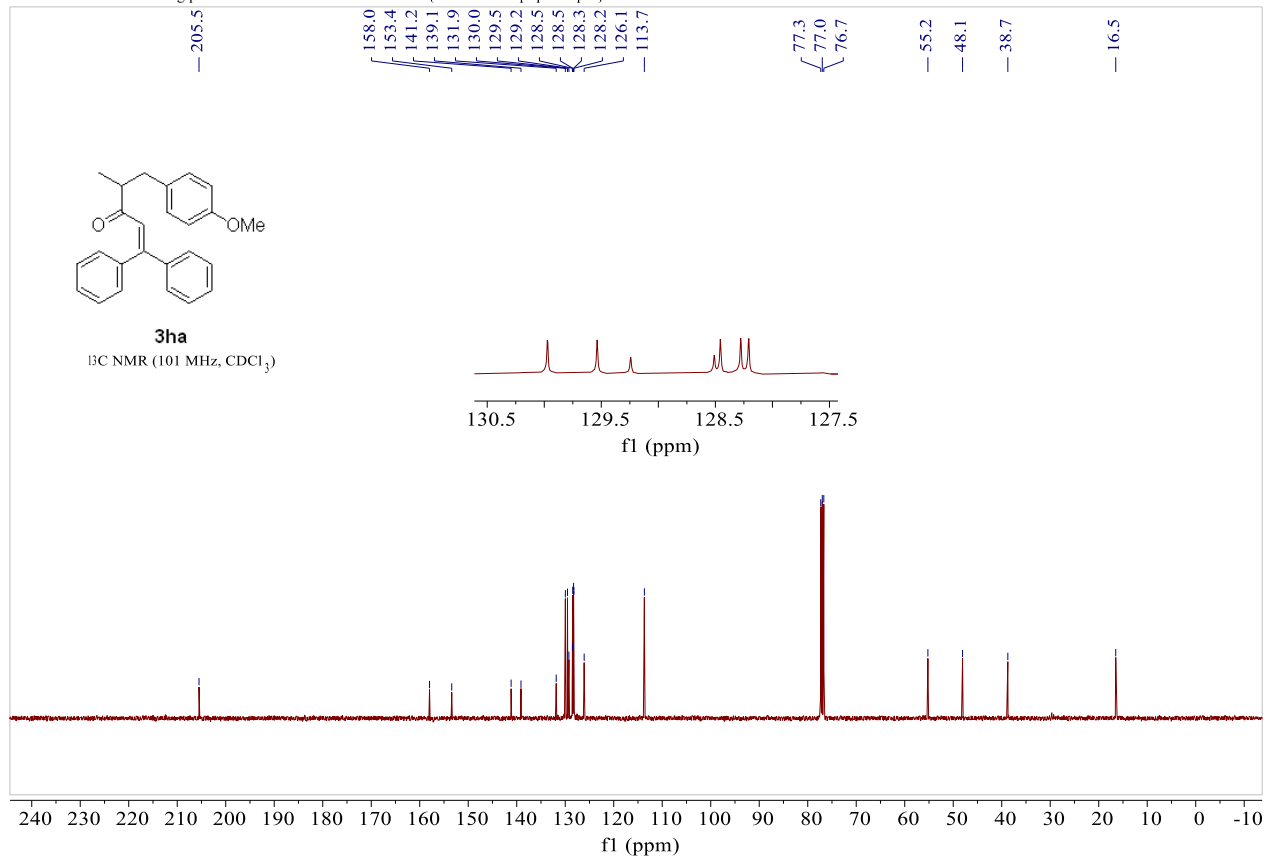

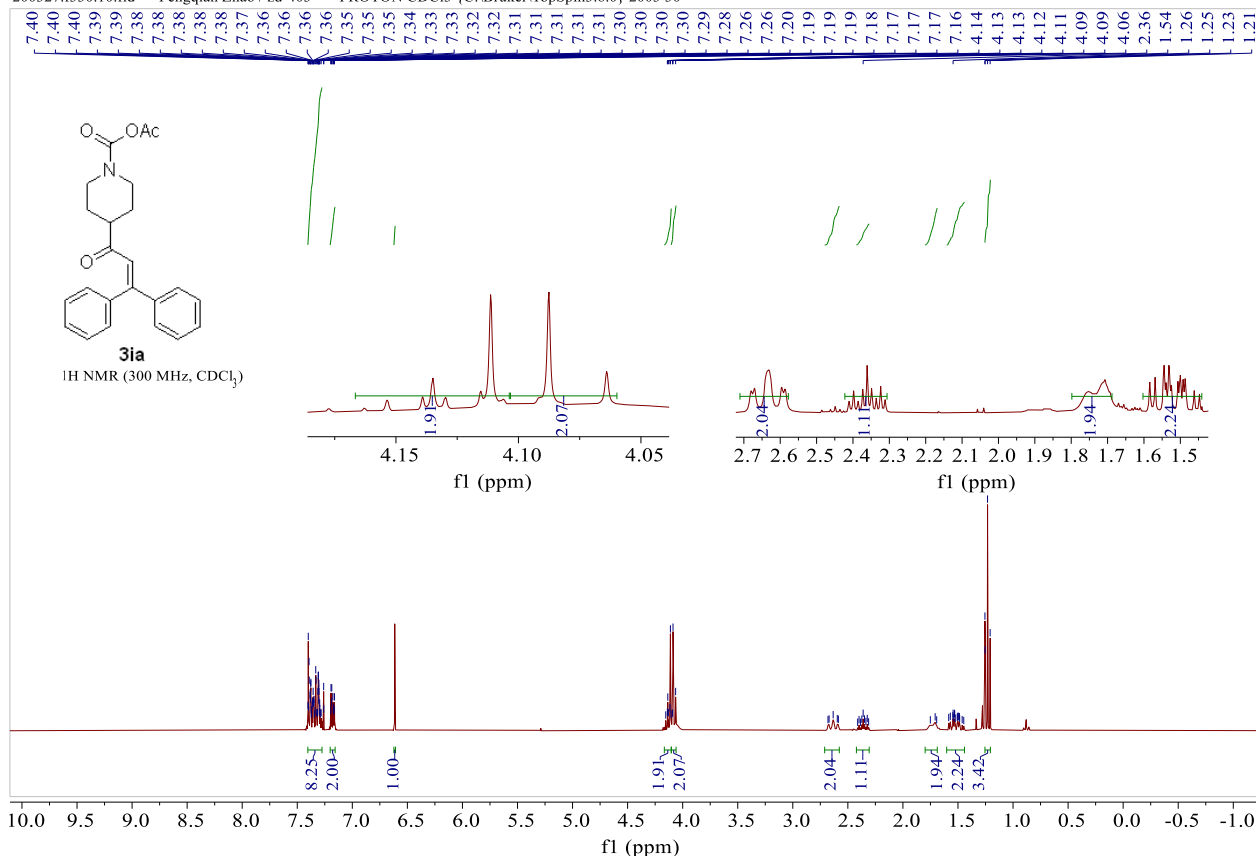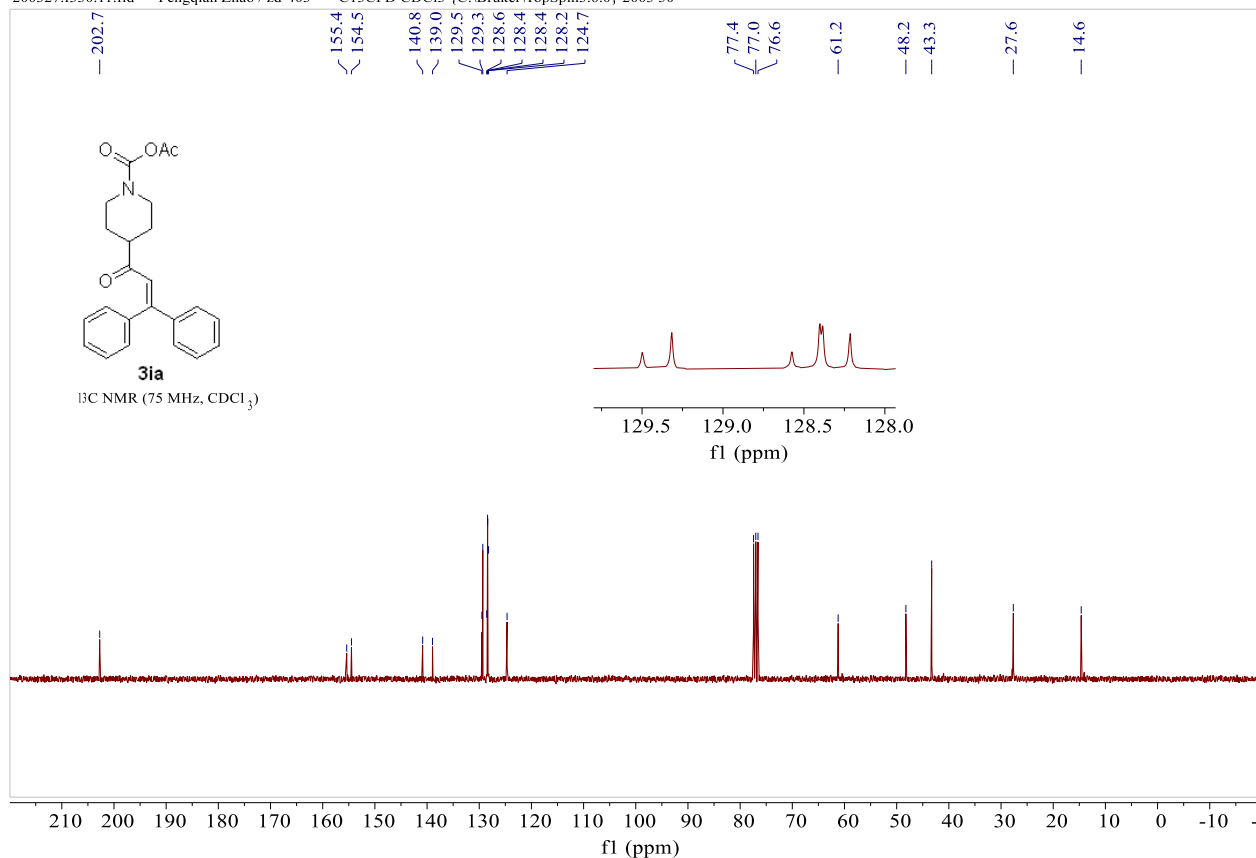

200407.412.10.fid — Fengqian Zhao zd-416 — Au1H CDCl3 (C:\Bruker\TopSpin3.5pl6) 2004 12

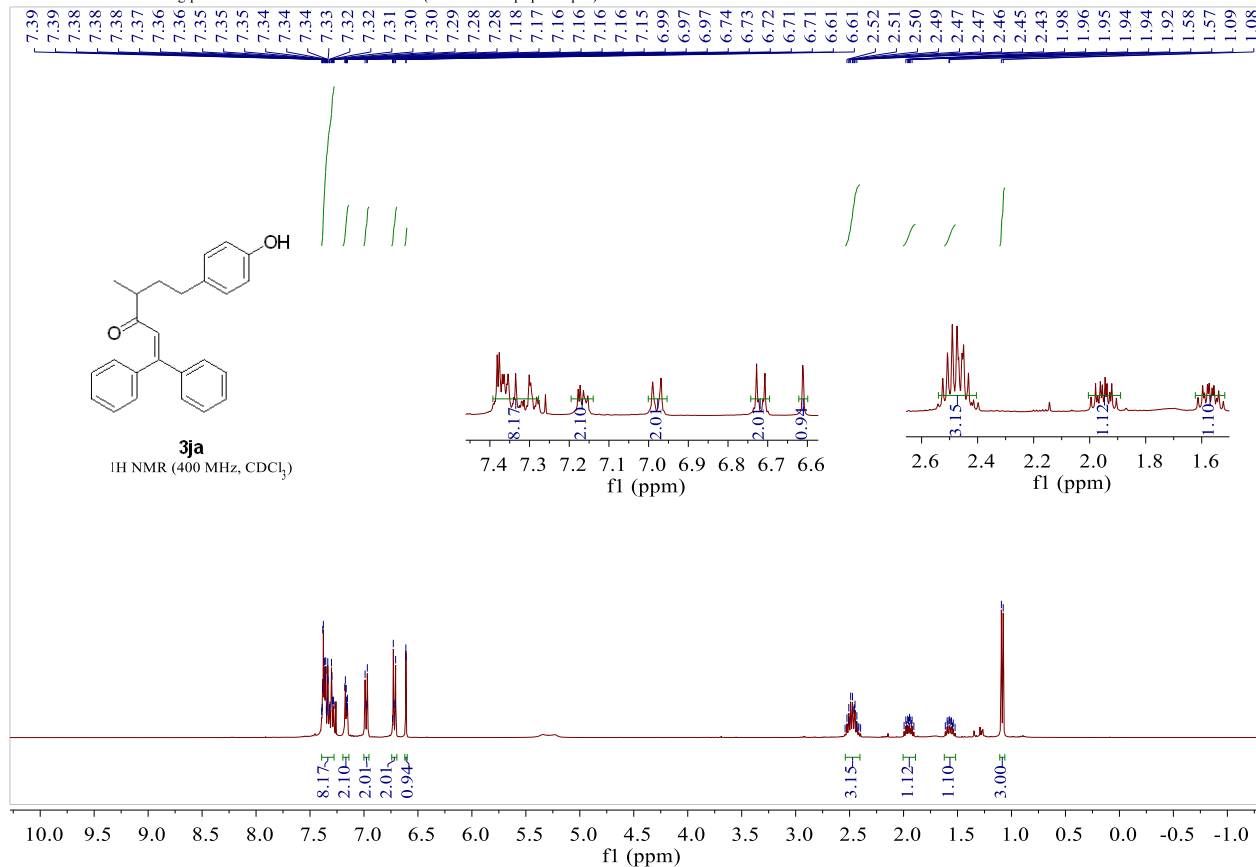

200407.412.11.fid — Fengqian Zhao zd-416 — Au13C CDCl3 (C:\Bruker\TopSpin3.5pl6) 2004 12

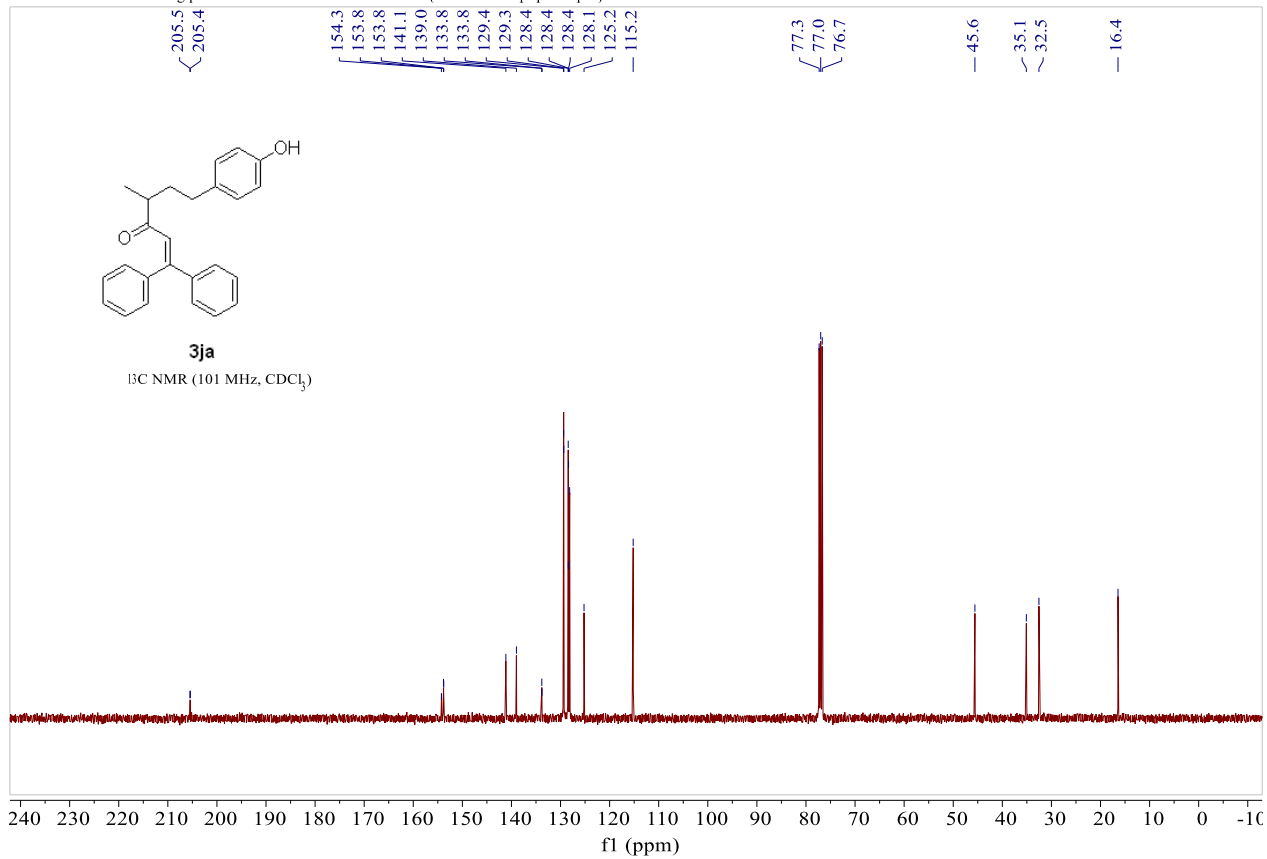

200407.418.10.fid — Fengqian Zhao zd-424-2 — Au1H CDCl3 {C:\Bruker\TopSpin3.5pl6} 2004 18

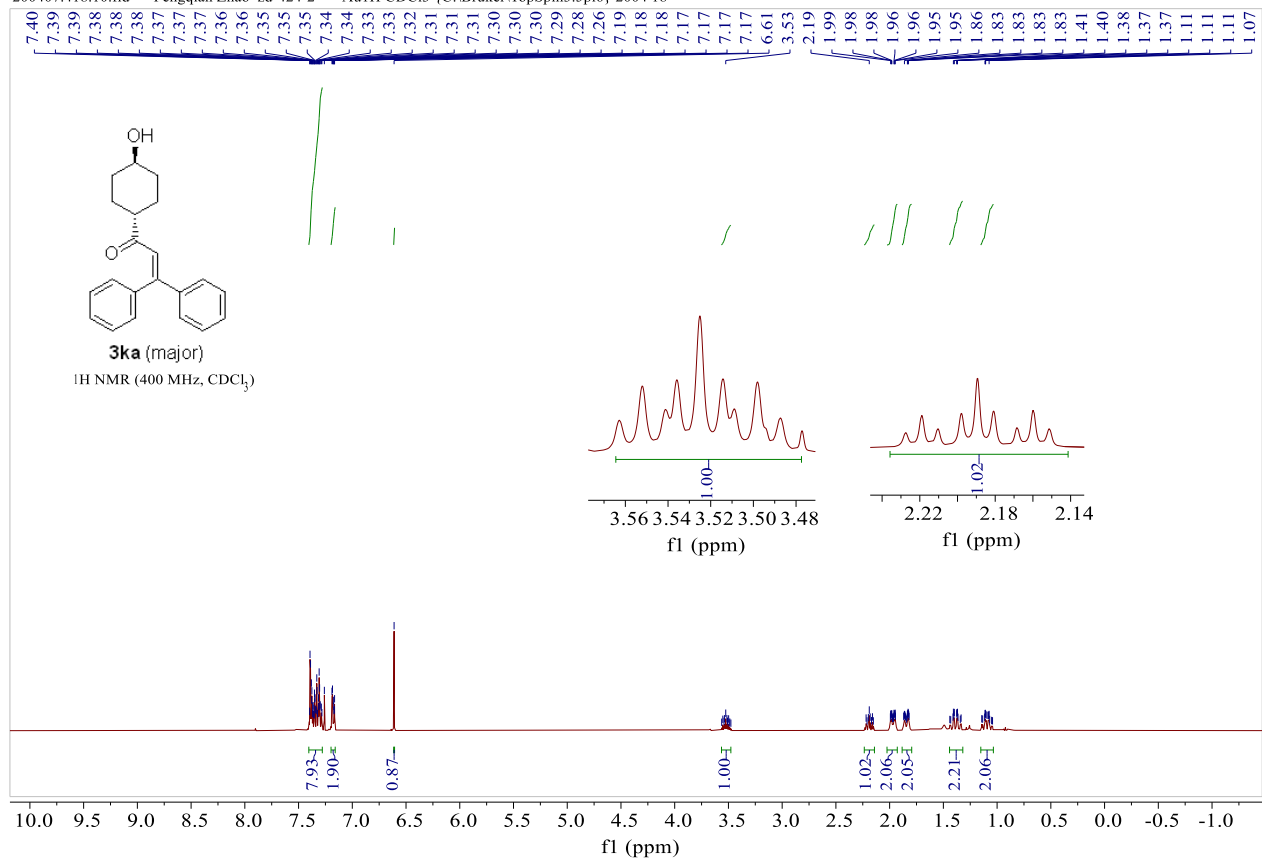

200407.418.11.fid — Fengqian Zhao zd-424-2 — Au13C CDCl3 {C:\Bruker\TopSpin3.5pl6} 2004 18

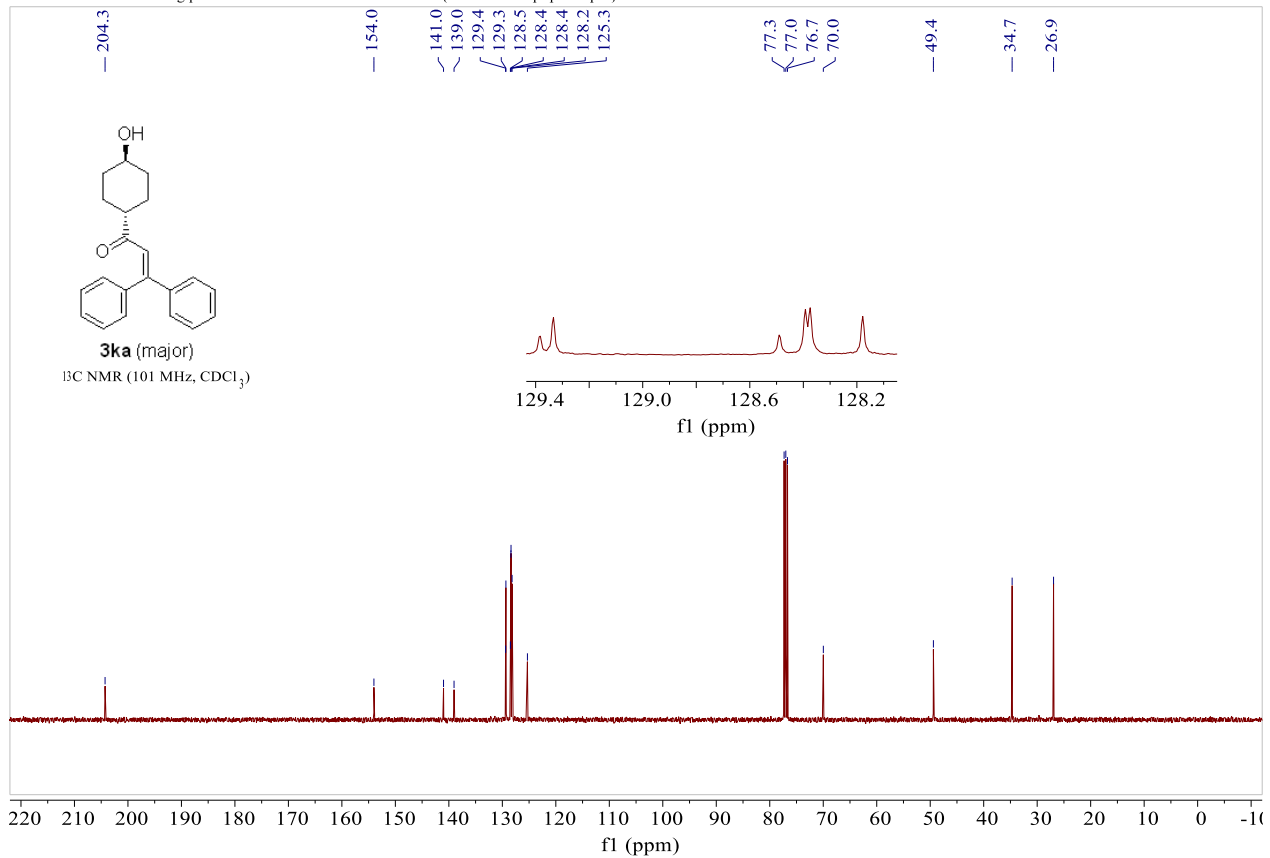

200417.f321.10.fid — Fengqian Zhao zd-424-1 — PROTON CDCl<sub>3</sub> {C:\Bruker\TopSpin3.6.0} 2004 21

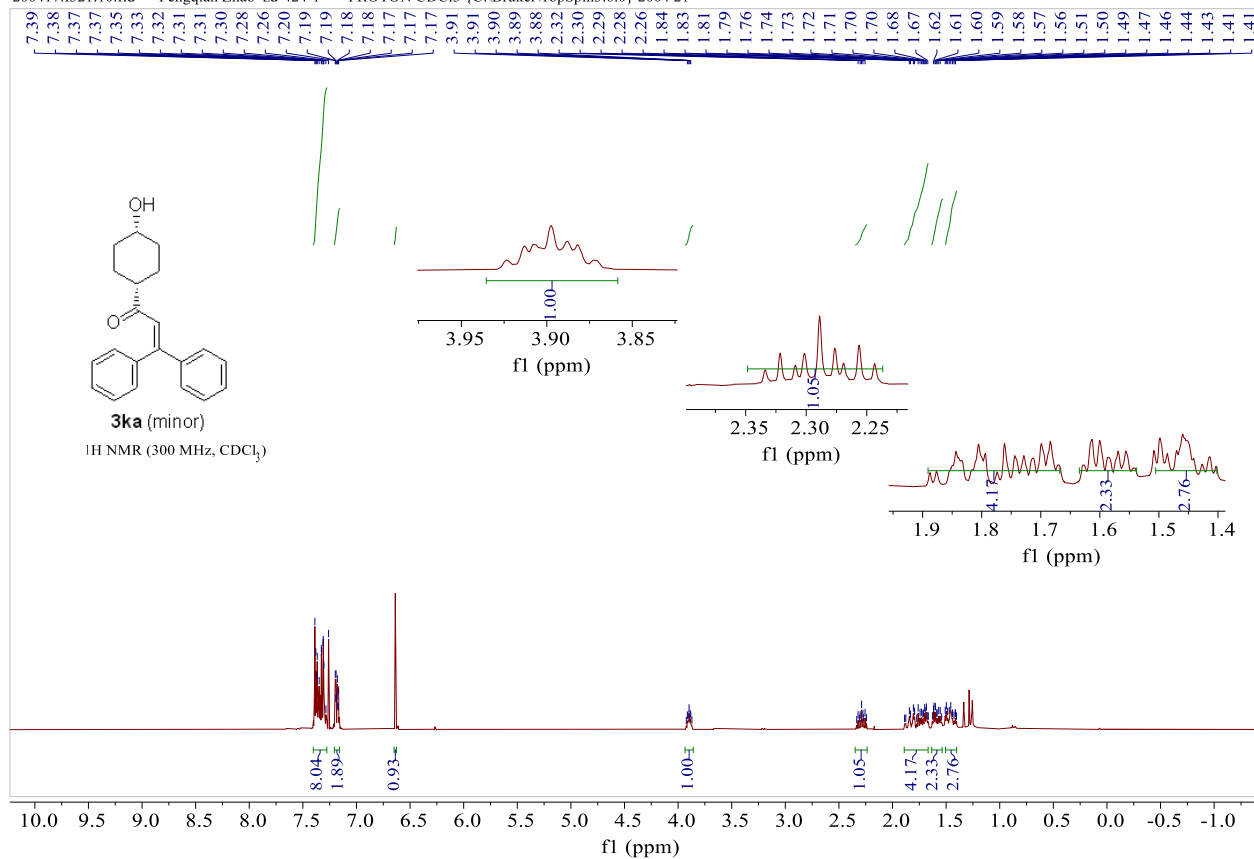

200407.417.11.fid — Fengqian Zhao zd-424-1 — Au13C CDCl<sub>3</sub> {C:\Bruker\TopSpin3.5p16} 2004 17

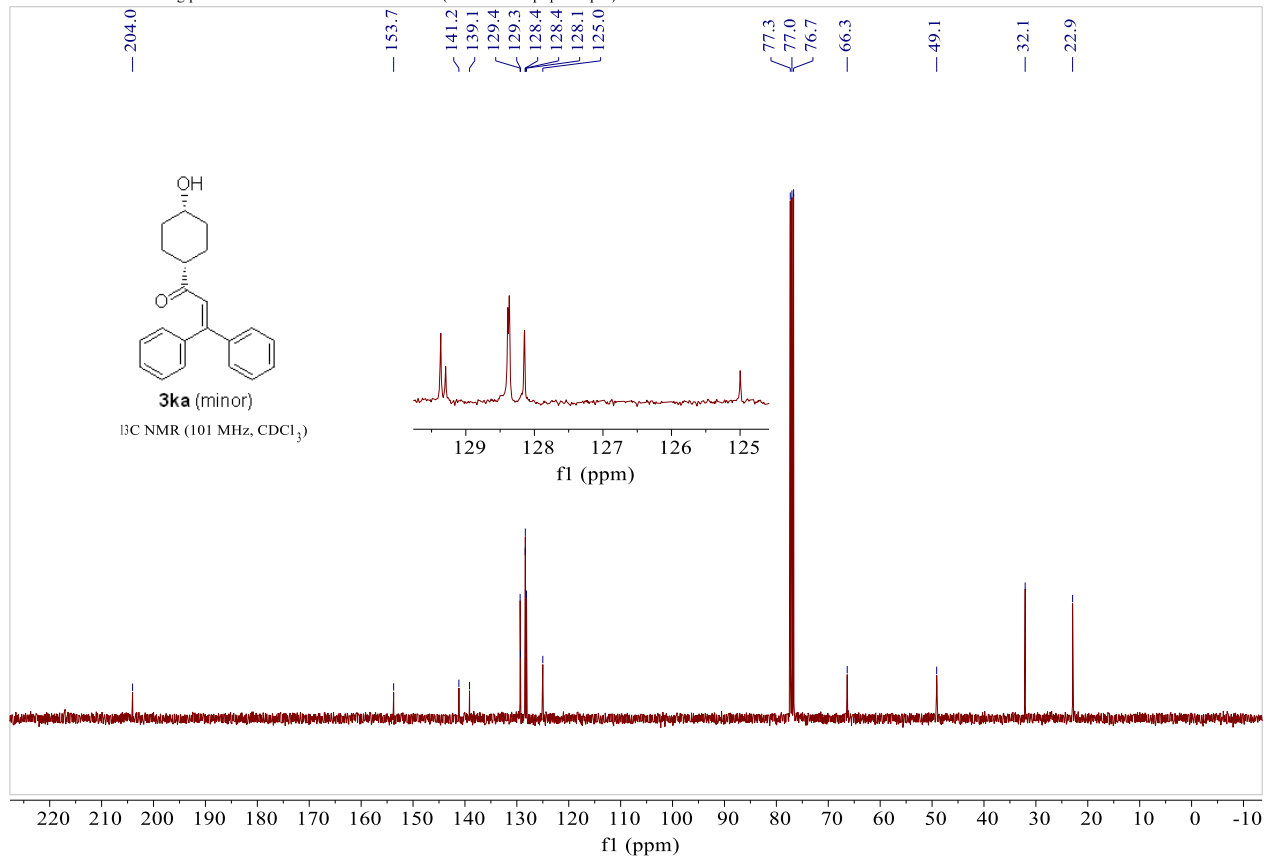

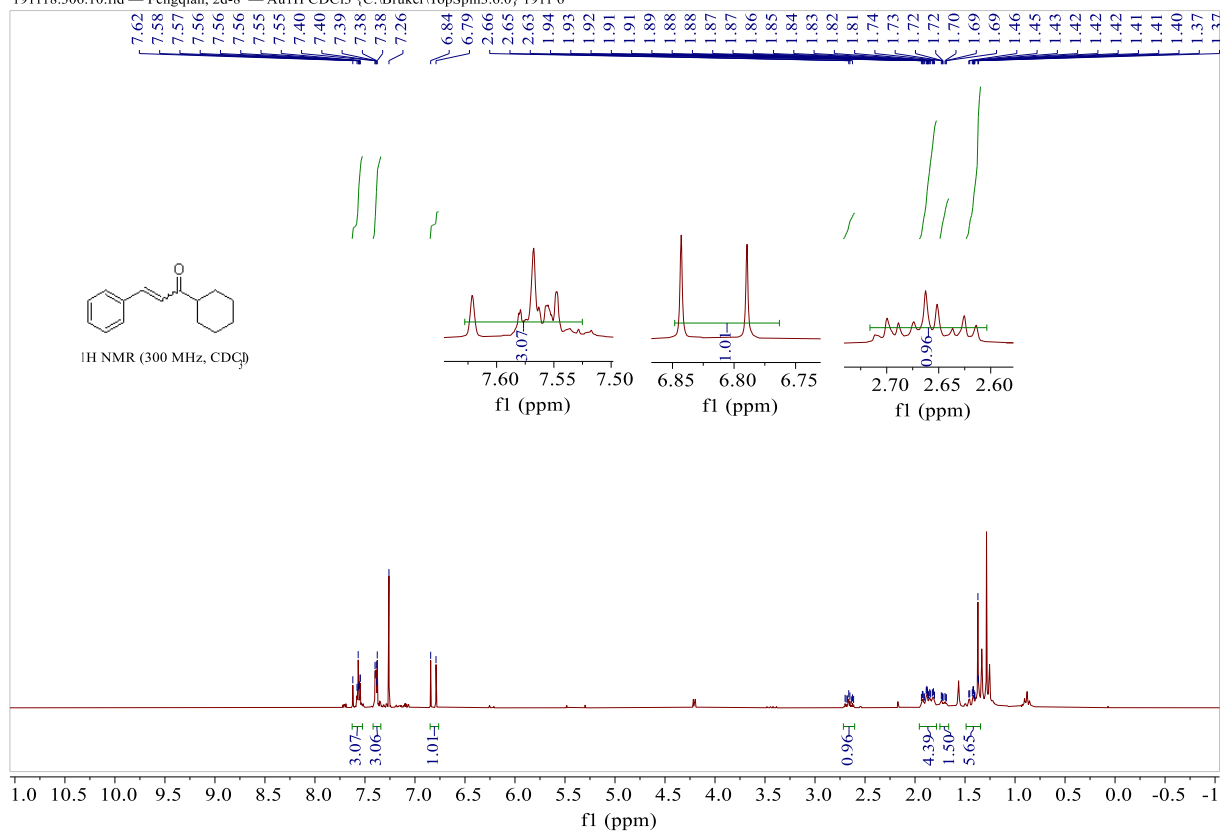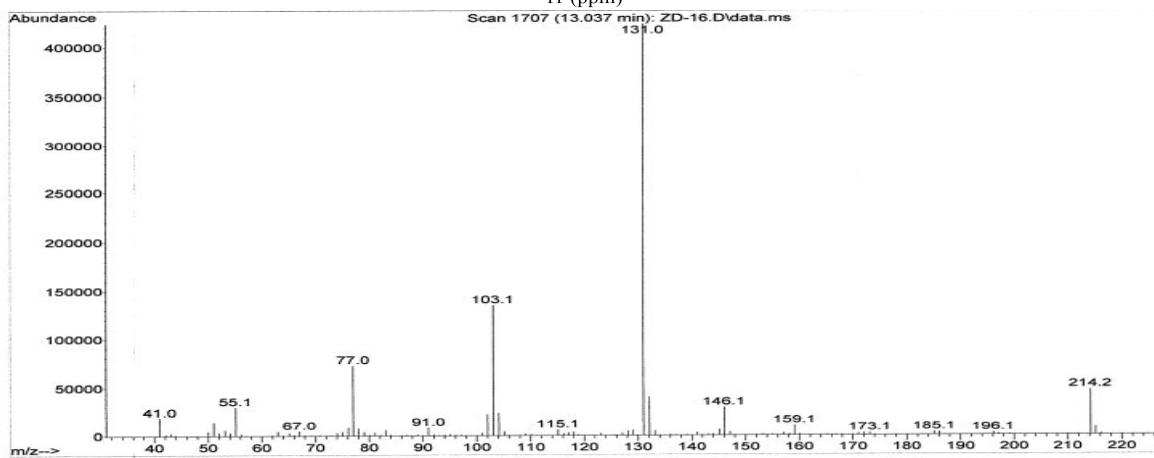

Supplement: d0cc04062b1.pdf [file d0cc04062b1.pdf]
